# Supplementary material for: Comparative Transcriptome Analysis of the Accessory Sex Gland and Testis from the Chinese Mitten Crab (Eriocheir sinensis)
Source: PLoS One. 2013 Jan 16;8(1):e53915. doi: 10.1371/journal.pone.0053915 (PMC3547057; doi:10.1371/journal.pone.0053915)
Supplement: Table S1 — Sequences with significant BLAST matches against Nr database for E. sinensis . (XLS) [file pone.0053915.s001.xls]

## Sheet: Annotation-all
geneID	geneLength	FuXingXianZuZhi_RPKM	JingChaoZuZhi2_RPKM	Nr-Evalue	Nr-annotation
Unigene10000_All	509	0	0	--	--
Unigene10001_All	565	0.4448	0.443	--	--
Unigene10002_All	534	4.0001	2.3435	--	--
Unigene10003_All	589	0.4267	0	3e-06	protein-cysteine N-palmitoyltransferase HHAT-like [Ailuropoda melanoleuca]
Unigene10004_All	593	3.6021	0.8441	--	--
Unigene10005_All	538	0.4671	2.3261	1e-07	mCG1050357 [Mus musculus]
Unigene10006_All	582	5.8291	3.4404	2e-30	Protein son of sevenless [Harpegnathos saltator]
Unigene10007_All	753	3.5042	2.4929	3e-30	phosphatidylinositol 3-kinase catalytic subunit type 3 [Bos taurus] >gi|148743832|gb|AAI42207.1| PIK3C3 protein [Bos taurus]
Unigene10008_All	571	2.4206	1.315	2e-16	RecName: Full=UPF0462 protein C4orf33 homolog >gi|56789482|gb|AAH88236.1| Similar to protein C33A12.3 [Rattus norvegicus] >gi|149048817|gb|EDM01358.1| similar to protein C33A12.3, isoform CRA_a [Rattus norvegicus] >gi|149048819|gb|EDM01360.1| similar to protein C33A12.3, isoform CRA_a [Rattus norvegicus] >gi|149048820|gb|EDM01361.1| similar to protein C33A12.3, isoform CRA_a [Rattus norvegicus]
Unigene10009_All	525	0	0.4767	6e-34	AGAP001692-PA [Anopheles gambiae str. PEST] >gi|157012622|gb|EAL38549.3| AGAP001692-PA [Anopheles gambiae str. PEST]
Unigene1000_All	894	45.8186	28.1363	8e-56	AGAP003240-PA [Anopheles gambiae str. PEST] >gi|30177230|gb|EAA08399.2| AGAP003240-PA [Anopheles gambiae str. PEST]
Unigene10010_All	536	0	0	--	--
Unigene10011_All	499	0.2518	1.0032	--	--
Unigene10012_All	495	5.3306	1.0113	--	--
Unigene10013_All	1729	5.8138	29.6755	1e-47	chronic lymphocytic leukemia deletion region gene 6 protein homolog isoform 1 [Apis mellifera]
Unigene10014_All	1195	1.5772	1.5708	6e-79	similar to limd1 [Tribolium castaneum]
Unigene10015_All	470	7.2182	134.463	--	--
Unigene10016_All	507	1.7348	0.2468	6e-09	similar to SD01562p [Nasonia vitripennis]
Unigene10017_All	490	0	0	--	--
Unigene10018_All	579	0.434	0.4323	4e-06	similar to endonuclease-reverse transcriptase [Strongylocentrotus purpuratus] >gi|115970603|ref|XP_001182201.1| similar to endonuclease-reverse transcriptase [Strongylocentrotus purpuratus]
Unigene10019_All	798	8.5026	1.4114	6e-25	similar to neuralized [Tribolium castaneum]
Unigene1001_All	1333	39.7781	66.7496	6e-79	calcium-binding protein p22 [Bombyx mori] >gi|87248283|gb|ABD36194.1| calcium-binding protein p22 [Bombyx mori] >gi|225346701|gb|ACN86373.1| calcium-binding protein [Bombyx mandarina]
Unigene10020_All	905	5.8313	1.2445	3e-34	similar to guanine nucleotide exchange factor p532 [Canis familiaris]
Unigene10021_All	543	1.157	0.6914	--	--
Unigene10022_All	535	10.099	2.807	1e-16	transmembrane protein c9orf46 [Ictalurus punctatus]
Unigene10023_All	576	1.3089	0.8691	--	--
Unigene10024_All	540	0	0	--	--
Unigene10025_All	481	3.6572	0.7805	3e-14	LRP1 [Takifugu rubripes]
Unigene10026_All	508	5.6889	0	5e-17	ribosomal protein L12 [Manduca sexta]
Unigene10027_All	513	0.4899	0.4879	7e-09	similar to poly [Nasonia vitripennis]
Unigene10028_All	1480	0	0.0846	2e-79	Probable E3 ubiquitin-protein ligase HERC4 [Harpegnathos saltator]
Unigene10029_All	690	7.1019	1.995	1e-35	probable carboxypeptidase PM20D1 precursor [Xenopus (Silurana) tropicalis] >gi|123884343|sp|Q08BT9.1|P20D1_XENTR RecName: Full=Probable carboxypeptidase PM20D1; AltName: Full=Peptidase M20 domain-containing protein 1; Flags: Precursor >gi|115528562|gb|AAI24565.1| pm20d1 protein [Xenopus (Silurana) tropicalis]
Unigene1002_All	2932	13.6706	33.3347	1e-136	novel protein (zgc:55655) [Danio rerio]
Unigene10030_All	491	9.9803	7.1365	2e-19	histone cluster 1, H2ae-like [Rattus norvegicus]
Unigene10031_All	513	5.1436	36.1039	--	--
Unigene10032_All	910	99.1391	8.1137	4e-28	similar to prefoldin subunit [Nasonia vitripennis]
Unigene10033_All	495	3.0461	2.0225	1e-21	transformation/transcription domain-associated protein isoform 1 [Apis mellifera]
Unigene10034_All	1548	4.1396	9.7819	5e-35	Uncharacterized protein C1orf198 [Camponotus floridanus]
Unigene10035_All	416	11.4776	7.8215	7e-11	endonuclease and reverse transcriptase-like protein [Bombyx mori]
Unigene10036_All	1145	4.7187	10.6017	3e-08	CG32666, isoform B [Drosophila melanogaster] >gi|45554857|ref|NP_996411.1| CG32666, isoform A [Drosophila melanogaster] >gi|122091999|sp|Q0KHT7.1|Y2666_DROME RecName: Full=Probable serine/threonine-protein kinase CG32666 >gi|22833094|gb|AAF48053.2| CG32666, isoform B [Drosophila melanogaster] >gi|45446914|gb|AAS65317.1| CG32666, isoform A [Drosophila melanogaster]
Unigene10037_All	562	8.0487	2.2268	3e-06	GilT [Giardia intestinalis]
Unigene10038_All	634	9.7111	2.9608	1e-32	similar to solute carrier family 35 member 3A [Hydra magnipapillata]
Unigene10039_All	722	4.5248	1.7333	4e-28	Peptidyl-prolyl cis-trans isomerase SDCCAG10 [Camponotus floridanus]
Unigene1003_All	4232	10.0354	36.2538	5e-12	Low-density lipoprotein receptor-related protein 1B [Camponotus floridanus]
Unigene10040_All	524	0.4796	0.4776	--	--
Unigene10041_All	556	3.1638	2.4759	1e-44	similar to G protein beta subunit, partial [Tribolium castaneum]
Unigene10042_All	512	11.7797	1.7109	1e-11	carboxypeptidase inhibitor [Bombyx mori] >gi|95102736|gb|ABF51309.1| carboxypeptidase inhibitor [Bombyx mori]
Unigene10043_All	551	5.2449	25.8918	--	--
Unigene10044_All	1677	3.971	0.9701	--	--
Unigene10045_All	495	2.0307	0.2528	--	--
Unigene10046_All	1133	1.6635	0.9941	3e-57	Rho guanine nucleotide exchange factor 12 [Camponotus floridanus]
Unigene10047_All	550	1.5992	5.9159	6e-20	transbilayer Amphipath transporters family member [Loa loa] >gi|307756223|gb|EFO15457.1| transbilayer Amphipath transporters family member [Loa loa]
Unigene10048_All	538	4.4374	0.4652	--	--
Unigene10049_All	499	1.7626	1.2539	--	--
Unigene1004_All	512	117.551	72.8376	9e-64	filamin-B-like [Apis mellifera]
Unigene10050_All	510	1.2319	0	4e-08	similar to zinc finger protein 99 [Tribolium castaneum]
Unigene10051_All	1813	21.9697	1.2425	1e-140	solute carrier family 23 member 1-like [Xenopus (Silurana) tropicalis]
Unigene10052_All	693	15.7742	0.7223	--	--
Unigene10053_All	810	0	0	5e-57	cxpwmw03 [Periplaneta americana]
Unigene10054_All	1719	0	0	9e-99	p300/CBP-associated factor [Taeniopygia guttata]
Unigene10055_All	559	3.1469	2.2387	--	--
Unigene10056_All	506	3.2282	0.742	--	--
Unigene10057_All	533	3.3004	1.174	--	--
Unigene10058_All	628	1.8007	0.1993	--	--
Unigene10059_All	522	4.092	6.2332	--	--
Unigene1005_All	2059	5.004	12.2166	3e-37	RecName: Full=Foot protein 1 variant 1; Flags: Precursor >gi|66394858|gb|AAY46226.1| foot protein 1 variant 1 [Perna viridis]
Unigene10060_All	509	4.9371	0.9834	--	--
Unigene10061_All	519	4.5999	0.7234	--	--
Unigene10062_All	1208	3.9526	0.9324	6e-27	cytochrome P450 9AA1 [Tribolium castaneum]
Unigene10063_All	738	0.3405	0	5e-45	sorting nexin-27-like isoform 1 [Acyrthosiphon pisum]
Unigene10064_All	1779	3.9552	2.9545	0	tubulin, beta 2C-like [Saccoglossus kowalevskii]
Unigene10065_All	529	0.7126	0.4731	--	--
Unigene10066_All	845	4.6096	0.5924	1e-14	Cytochrome c oxidase subunit 5B, mitochondrial [Camponotus floridanus]
Unigene10067_All	499	0.5036	0	4e-38	flap endonuclease 1 [Apis mellifera]
Unigene10068_All	516	0	0.4851	2e-10	AGAP000892-PA [Anopheles gambiae str. PEST] >gi|55238069|gb|EAA12105.3| AGAP000892-PA [Anopheles gambiae str. PEST]
Unigene10069_All	919	2.461	1.0894	--	--
Unigene1006_All	681	18.2663	222.355	--	--
Unigene10070_All	540	2.3268	1.1587	--	--
Unigene10071_All	831	0	0	--	--
Unigene10072_All	2046	2.5793	2.5689	5e-74	CLIP-associating protein [Camponotus floridanus]
Unigene10073_All	1188	9.6247	7.1631	3e-16	Cation-dependent mannose-6-phosphate receptor [Salmo salar] >gi|209149767|gb|ACI32990.1| Cation-dependent mannose-6-phosphate receptor precursor [Salmo salar]
Unigene10074_All	503	2.7478	1.244	--	--
Unigene10075_All	487	6.9662	0.5139	--	--
Unigene10076_All	484	0	0	3e-06	GK22046 [Drosophila willistoni] >gi|194162323|gb|EDW77224.1| GK22046 [Drosophila willistoni]
Unigene10077_All	619	0	0.2022	--	--
Unigene10078_All	534	0	0	2e-30	LOW QUALITY PROTEIN: probable E3 ubiquitin-protein ligase HERC2-like [Xenopus (Silurana) tropicalis]
Unigene10079_All	995	5.9352	0	7e-09	GI13689 [Drosophila mojavensis] >gi|193920401|gb|EDW19268.1| GI13689 [Drosophila mojavensis]
Unigene1007_All	755	6.1577	20.8849	--	--
Unigene10080_All	958	2.2297	0.7838	2e-64	GH15749 [Drosophila grimshawi] >gi|193896651|gb|EDV95517.1| GH15749 [Drosophila grimshawi]
Unigene10081_All	529	0.475	0.4731	2e-22	GD15625 [Drosophila simulans] >gi|194204732|gb|EDX18308.1| GD15625 [Drosophila simulans]
Unigene10082_All	1163	3.2412	7.1019	2e-90	similar to proteasome subunit alpha type [Tribolium castaneum]
Unigene10083_All	489	1.7987	0.7678	--	--
Unigene10084_All	524	0	0	--	--
Unigene10085_All	540	0	0	4e-17	similar to CRSP complex subunit 3 [Tribolium castaneum]
Unigene10086_All	497	2.5282	1.0072	1e-06	R3H domain-containing protein 1 [Harpegnathos saltator]
Unigene10087_All	1600	13.8215	3.9107	9e-93	similar to ubiquitin conjugating enzyme 7 interacting protein [Nasonia vitripennis]
Unigene10088_All	615	6.7422	5.6976	9e-16	ancient conserved domain protein [Ixodes scapularis] >gi|215495875|gb|EEC05516.1| ancient conserved domain protein [Ixodes scapularis]
Unigene10089_All	544	1.8478	3.6807	--	--
Unigene1008_All	460	49.1673	152.077	--	--
Unigene10090_All	1397	2.9681	12.5412	3e-40	RING finger protein 126-B-like [Acyrthosiphon pisum]
Unigene10091_All	502	2.7533	1.745	--	--
Unigene10092_All	504	0	0	--	--
Unigene10093_All	532	4.4875	0.2352	3e-34	projectin [Procambarus clarkii]
Unigene10094_All	566	2.442	0.6633	--	--
Unigene10095_All	592	0.2122	0	3e-30	similar to nucleolar protein c7b [Tribolium castaneum]
Unigene10096_All	871	3.4622	5.0287	3e-87	NADH dehydrogenase iron-sulfur protein 3, mitochondrial precursor [Lepeophtheirus salmonis] >gi|290562133|gb|ADD38463.1| NADH dehydrogenase iron-sulfur protein 3, mitochondrial [Lepeophtheirus salmonis]
Unigene10097_All	568	1.9909	0.661	1e-17	similar to ENSANGP00000029084 [Nasonia vitripennis]
Unigene10098_All	489	0.5139	0	--	--
Unigene10099_All	547	0.2297	0.6863	7e-18	Protein FAM49B [Harpegnathos saltator]
Unigene1009_All	2114	9.6882	18.9432	2e-57	vrille [Danaus plexippus]
Unigene100_All	830	133.068	98.758	1e-25	eukaryotic translation initiation factor 3, subunit 10 theta, 150/170kDa-like [Saccoglossus kowalevskii]
Unigene10100_All	1813	1.8712	2.0708	0	AGAP009074-PA [Anopheles gambiae str. PEST] >gi|157013694|gb|EAA14748.3| AGAP009074-PA [Anopheles gambiae str. PEST]
Unigene10101_All	494	3.8153	0.5067	--	--
Unigene10102_All	595	0	0	8e-43	Kinesin light chain [Camponotus floridanus]
Unigene10103_All	5770	2.7438	1.8652	4e-63	similar to klarsicht CG17046-PB [Tribolium castaneum]
Unigene10104_All	1122	2.3517	4.2384	4e-37	GK11664 [Drosophila willistoni] >gi|194165786|gb|EDW80687.1| GK11664 [Drosophila willistoni]
Unigene10105_All	1272	4.05	2.6564	--	--
Unigene10106_All	2096	9.0521	4.1197	1e-45	golgi associated PDZ and coiled-coil motif containing, isoform CRA_b [Mus musculus]
Unigene10107_All	1487	3.1265	4.2079	2e-40	cation-independent mannose-6-phosphate receptor [Danio rerio] >gi|48375054|gb|AAT42194.1| cation-independent mannose 6-phosphate receptor [Danio rerio] >gi|55251379|emb|CAH68920.1| novel protein similar to vertebrate insulin-like growth factor 2 receptor (IGF2R) [Danio rerio]
Unigene10108_All	514	0.2445	0	2e-26	Ral guanine nucleotide dissociation stimulator-like 1 [Harpegnathos saltator]
Unigene10109_All	859	0	0.8741	--	--
Unigene1010_All	357	13.3745	23.4864	2e-07	Hypothetical 17.1 kDa protein in PUR5 3'region [Brugia malayi]
Unigene10110_All	498	4.5416	2.0103	1e-13	probable carboxypeptidase PM20D1.1 [Danio rerio] >gi|81097657|gb|AAI09433.1| Zgc:123113 [Danio rerio]
Unigene10111_All	497	0	0	7e-07	similar to CG4699 CG4699-PA [Tribolium castaneum]
Unigene10112_All	3369	18.536	0	2e-83	pol-like protein [Biomphalaria glabrata]
Unigene10113_All	493	3.5681	0.2538	--	--
Unigene10114_All	1112	2.2599	13.3922	--	--
Unigene10115_All	646	9.9197	2.1309	--	--
Unigene10116_All	1498	2.5164	5.5137	--	--
Unigene10117_All	755	1.8307	4.8068	7e-36	Putative RNA-binding protein 15B [Camponotus floridanus]
Unigene10118_All	499	1.0072	0.2508	--	--
Unigene10119_All	565	0	0	1e-11	LOC100137715 protein [Xenopus laevis]
Unigene1011_All	458	6.0356	7.6507	1e-16	Hepatic leukemia factor [Camponotus floridanus]
Unigene10120_All	984	8.0447	2.162	5e-27	GE13386 [Drosophila yakuba] >gi|194177041|gb|EDW90652.1| GE13386 [Drosophila yakuba]
Unigene10121_All	577	17.4211	2.6026	--	--
Unigene10122_All	557	1.3535	2.4714	6e-17	Cell growth-regulating nucleolar protein [Caligus rogercresseyi]
Unigene10123_All	826	1.8254	0.4545	6e-33	similar to CG31108 CG31108-PA [Tribolium castaneum]
Unigene10124_All	560	0	0	2e-18	phospholipase B-like protein [Polysphondylium pallidum PN500]
Unigene10125_All	899	0	0	9e-63	Calponin-3 [Caligus clemensi]
Unigene10126_All	536	2.8131	0.9339	1e-24	hypoxia inducible factor 1 beta [Litopenaeus vannamei]
Unigene10127_All	501	0	0	--	--
Unigene10128_All	468	0	0	--	--
Unigene10129_All	868	2.4609	1.5859	1e-15	similar to ENSANGP00000021503 [Nasonia vitripennis]
Unigene1012_All	1046	4.6848	39.242	1e-83	N(4)-(Beta-N-acetylglucosaminyl)-L-asparaginase [Camponotus floridanus]
Unigene10130_All	546	0.2301	0	6e-20	DNA damage-binding protein 1 [Camponotus floridanus]
Unigene10131_All	528	0.7139	1.1851	1e-05	membrane-spanning 4-domains, subfamily A, member 4-like [Mus musculus]
Unigene10132_All	514	5.6225	4.8694	1e-23	GJ16548 [Drosophila virilis] >gi|194146842|gb|EDW62561.1| GJ16548 [Drosophila virilis]
Unigene10133_All	952	2.3757	2.3662	3e-44	gastric caeca sugar transporter [Locusta migratoria]
Unigene10134_All	551	3.6486	1.3627	2e-24	C-myc promoter-binding protein [Camponotus floridanus]
Unigene10135_All	621	0.2023	0	2e-09	hCG1793893 [Homo sapiens]
Unigene10136_All	510	7.3912	0.2454	--	--
Unigene10137_All	668	4.3263	0.1873	1e-07	RecName: Full=Spidroin-2; AltName: Full=Dragline silk fibroin 2 >gi|159714|gb|AAA29381.1| dragline silk fibroin [Nephila clavipes]
Unigene10138_All	1152	3.2721	2.6072	2e-65	tyrosine-protein kinase Abl-like [Apis mellifera]
Unigene10139_All	483	0	0	--	--
Unigene1013_All	1428	7.5671	15.8621	1e-53	WD repeat-containing protein 81 [Camponotus floridanus]
Unigene10140_All	699	7.7295	0	--	--
Unigene10141_All	711	1.7672	5.4563	4e-15	basic proline-rich protein [Sus scrofa] >gi|15145793|gb|AAK61381.1| basic proline-rich protein [Sus scrofa]
Unigene10142_All	621	4.249	3.0228	8e-23	RIKEN cDNA B230315N10 gene [Mus musculus] >gi|148689406|gb|EDL21353.1| mCG23702, isoform CRA_a [Mus musculus]
Unigene10143_All	921	0	0	6e-06	hypothetical protein DDB_G0280845 [Dictyostelium discoideum AX4] >gi|60469036|gb|EAL67034.1| hypothetical protein DDB_G0280845 [Dictyostelium discoideum AX4]
Unigene10144_All	623	2.2185	1.607	--	--
Unigene10145_All	363	7.6151	52.4018	4e-09	CRE-CLEC-202 protein [Caenorhabditis remanei] >gi|308259993|gb|EFP03946.1| CRE-CLEC-202 protein [Caenorhabditis remanei]
Unigene10146_All	472	2.3959	0.2651	5e-23	similar to ash1 (absent, small, or homeotic)-like [Gallus gallus]
Unigene10147_All	499	2.518	2.7587	--	--
Unigene10148_All	644	6.0484	0.3886	2e-10	Polypeptide N-acetylgalactosaminyltransferase 5 [Camponotus floridanus]
Unigene10149_All	665	0.3779	0	--	--
Unigene1014_All	1488	8.6131	54.7504	--	--
Unigene10150_All	534	1.6471	0.2344	--	--
Unigene10151_All	519	0.7263	0	2e-06	hypothetical protein TTHERM_01229010 [Tetrahymena thermophila] >gi|89284228|gb|EAR82284.1| hypothetical protein TTHERM_01229010 [Tetrahymena thermophila SB210]
Unigene10152_All	523	0	0	--	--
Unigene10153_All	848	3.408	1.3282	--	--
Unigene10154_All	637	1.578	2.161	7e-09	GA18916 [Drosophila pseudoobscura pseudoobscura] >gi|198131136|gb|EAL27215.2| GA18916 [Drosophila pseudoobscura pseudoobscura]
Unigene10155_All	2131	12.3232	0.7634	1e-11	Hypothetical 17.1 kDa protein in PUR5 3'region [Brugia malayi]
Unigene10156_All	551	4.3328	4.3153	6e-14	similar to MICAL-like CG11259-PA [Tribolium castaneum]
Unigene10157_All	938	10.4485	4.2693	1e-06	hypothetical protein PANDA_004153 [Ailuropoda melanoleuca]
Unigene10158_All	537	10.9973	0.233	8e-11	T-cell receptor beta chain ANA 11 [Brugia malayi]
Unigene10159_All	932	2.5615	3.2226	7e-15	U88 [Brugia malayi]
Unigene1015_All	1028	33.9792	3.8955	--	--
Unigene10160_All	483	0	0	--	--
Unigene10161_All	510	0	0	--	--
Unigene10162_All	557	1.8047	1.5727	--	--
Unigene10163_All	517	0	0.9682	9e-22	similar to Dedicator of cytokinesis protein 2 [Tribolium castaneum]
Unigene10164_All	488	10.5566	4.3595	3e-25	similar to predicted protein [Ciona intestinalis]
Unigene10165_All	833	3.9218	4.0563	5e-15	CG12129-like [Saccoglossus kowalevskii]
Unigene10166_All	1027	2.3246	0.1219	6e-26	Ubiquitin carboxyl-terminal hydrolase 32 [Harpegnathos saltator]
Unigene10167_All	621	9.1051	0	--	--
Unigene10168_All	526	0.9555	2.1412	--	--
Unigene10169_All	541	0.2323	0	3e-38	AGAP004451-PA [Anopheles gambiae str. PEST] >gi|157017316|gb|EAA09124.4| AGAP004451-PA [Anopheles gambiae str. PEST]
Unigene1016_All	404	142.756	124.834	6e-15	Sequestosome-1 [Harpegnathos saltator]
Unigene10170_All	602	0.2087	0	--	--
Unigene10171_All	521	6.9939	2.6422	--	--
Unigene10172_All	1301	1.835	0.2886	1e-25	zinc finger protein 76 (expressed in testis)-like [Saccoglossus kowalevskii]
Unigene10173_All	346	5.0841	2.5318	--	--
Unigene10174_All	518	4.1236	0.7248	1e-07	similar to AGAP010801-PA [Tribolium castaneum]
Unigene10175_All	556	4.7458	1.8006	6e-20	Sodium leak channel non-selective protein [Harpegnathos saltator]
Unigene10176_All	982	0	0	4e-60	similar to NAD-dependent deacetylase sirtuin 2 homolog [Tribolium castaneum]
Unigene10177_All	530	1.6595	0	2e-10	Protein AF-10 [Camponotus floridanus]
Unigene10178_All	530	3.082	0	8e-11	Discoidin domain-containing receptor 2 [Camponotus floridanus]
Unigene10179_All	861	4.0862	2.7616	4e-06	peroxisomal biogenesis factor 3-like [Callithrix jacchus]
Unigene1017_All	799	11.6372	64.9996	1e-108	cleavage and polyadenylation specificity factor subunit 5-like isoform 2 [Apis mellifera]
Unigene10180_All	533	8.0152	42.0276	--	--
Unigene10181_All	542	0	0	--	--
Unigene10182_All	1068	2.9412	5.6244	1e-95	u3 small nucleolar ribonucleoprotein protein IMP4-like [Apis mellifera]
Unigene10183_All	514	1.7112	0	--	--
Unigene10184_All	1682	1.4941	0.1488	8e-44	U88 [Brugia malayi]
Unigene10185_All	540	2.3268	1.3905	--	--
Unigene10186_All	935	0.1344	0	3e-62	Pre-mRNA-splicing factor Slu7 [Camponotus floridanus]
Unigene10187_All	505	0.7464	0.4956	1e-12	tomosyn [Aedes aegypti] >gi|108877187|gb|EAT41412.1| tomosyn [Aedes aegypti]
Unigene10188_All	483	0	0	--	--
Unigene10189_All	892	1.5495	0.7015	4e-06	similar to vacuolar protein sorting 13D [Tribolium castaneum]
Unigene1018_All	544	3.9266	4.6009	1e-68	SEC14L1 protein [Homo sapiens]
Unigene10190_All	532	1.6533	0	--	--
Unigene10191_All	306	7.8018	6.9524	1e-07	nuclear localization signal binding protein [Mus musculus]
Unigene10192_All	554	0	0	1e-14	Mitochondrial import inner membrane translocase subunit TIM14 [Oncorhynchus mykiss]
Unigene10193_All	497	0	0	5e-62	Fizzy-related protein-like protein [Camponotus floridanus]
Unigene10194_All	1201	1.6739	2.084	9e-78	similar to armadillo repeat protein [Nasonia vitripennis]
Unigene10195_All	852	0.295	0.1469	3e-18	GI14690 [Drosophila mojavensis] >gi|193908876|gb|EDW07743.1| GI14690 [Drosophila mojavensis]
Unigene10196_All	642	0.3914	0	8e-31	farnesyltransferase, CAAX box, alpha [Danio rerio] >gi|120537655|gb|AAI29223.1| Zgc:158397 [Danio rerio]
Unigene10197_All	2787	6.2667	2.1104	0	Protein Swiss cheese [Harpegnathos saltator]
Unigene10198_All	842	0.2985	0.1486	2e-20	MOSC domain-containing protein 1, mitochondrial-like [Xenopus (Silurana) tropicalis]
Unigene10199_All	1464	3.5189	0.6838	3e-11	U88 [Brugia malayi]
Unigene1019_All	660	4.7595	11.5663	--	--
Unigene101_All	3378	22.7643	4.1492	1e-169	similar to sarcosine dehydrogenase [Ornithorhynchus anatinus]
Unigene10200_All	624	0	0	6e-21	epsilon-trimethyllysine 2-oxoglutarate dioxygenase [Aedes aegypti] >gi|108874140|gb|EAT38365.1| epsilon-trimethyllysine 2-oxoglutarate dioxygenase [Aedes aegypti]
Unigene10201_All	886	1.2764	0	--	--
Unigene10202_All	669	2.066	0	6e-22	similar to dead eye [Strongylocentrotus purpuratus] >gi|115959779|ref|XP_001192951.1| similar to dead eye [Strongylocentrotus purpuratus]
Unigene10203_All	835	13.6936	24.8789	--	--
Unigene10204_All	980	17.95	0	--	--
Unigene10205_All	837	3.3026	0	--	--
Unigene10206_All	823	4.5802	1.6726	--	--
Unigene10207_All	1600	0.5497	0.5475	1e-171	Tousled-like kinase, isoform G [Drosophila melanogaster] >gi|220901669|gb|ACL82886.1| Tousled-like kinase, isoform G [Drosophila melanogaster]
Unigene10208_All	592	0	0	1e-25	acetolactate synthase-like protein [Salmo salar] >gi|209154250|gb|ACI33357.1| Acetolactate synthase-like protein [Salmo salar]
Unigene10209_All	550	1.1423	0.4551	1e-42	GD22283 [Drosophila simulans] >gi|194190916|gb|EDX04492.1| GD22283 [Drosophila simulans]
Unigene1020_All	884	8.6704	37.0901	5e-15	mucin [Homo sapiens]
Unigene10210_All	2103	4.8993	2.2018	2e-33	receptor for egg jelly 7-like [Saccoglossus kowalevskii]
Unigene10211_All	498	0	0	--	--
Unigene10212_All	520	3.1412	0	--	--
Unigene10213_All	579	7.1614	1.513	4e-19	mitochondrial carnitine/acylcarnitine translocase [Loxostege sticticalis]
Unigene10214_All	990	3.6807	1.0113	5e-27	projectin [Procambarus clarkii]
Unigene10215_All	551	5.0169	1.3627	--	--
Unigene10216_All	533	2.8289	2.5827	8e-22	similar to ets [Tribolium castaneum]
Unigene10217_All	1606	4.3031	1.1688	3e-41	CG6178-like [Saccoglossus kowalevskii]
Unigene10218_All	509	3.9497	1.2293	--	--
Unigene10219_All	632	6.5608	2.7722	--	--
Unigene1021_All	813	8.5003	39.8674	1e-08	T-cell receptor beta chain ANA 11 [Brugia malayi]
Unigene10220_All	964	5.344	2.0771	3e-07	serine incorporator 1-like [Saccoglossus kowalevskii]
Unigene10221_All	1151	0.7642	1.7396	2e-22	Apoptosis regulator Bcl-X [Camponotus floridanus]
Unigene10222_All	1672	3.9078	2.3951	3e-27	mRNA-decapping enzyme 1B-like [Xenopus (Silurana) tropicalis]
Unigene10223_All	739	17.8528	144.957	2e-07	unnamed protein product [Homo sapiens]
Unigene10224_All	480	0	0	--	--
Unigene10225_All	313	6.423	38.3828	6e-07	hypothetical protein LOC100427387, partial [Macaca mulatta]
Unigene10226_All	746	2.0212	1.0065	--	--
Unigene10227_All	571	0	0	--	--
Unigene10228_All	564	2.005	0.4438	2e-12	similar to fragile site-associated protein [Tribolium castaneum]
Unigene10229_All	1938	7.3912	4.4556	1e-128	Phosphatidylinositide phosphatase SAC1 [Camponotus floridanus]
Unigene1022_All	1722	2.7728	3.4883	7e-27	similar to Activating molecule in BECN1-regulated autophagy protein 1 [Tribolium castaneum]
Unigene10230_All	739	4.5907	4.5722	2e-18	component of oligomeric golgi complex 2-like [Saccoglossus kowalevskii]
Unigene10231_All	2211	1.8754	0.3396	2e-46	Interleukin-16 [Harpegnathos saltator]
Unigene10232_All	620	0.8106	1.0092	7e-19	RXRa nuclear hormone receptor [Gecarcinus lateralis]
Unigene10233_All	540	5.1191	1.854	--	--
Unigene10234_All	519	6.0525	2.8935	--	--
Unigene10235_All	516	3.4091	0.4851	7e-06	GNAS complex locus, isoform CRA_c [Homo sapiens] >gi|119595876|gb|EAW75470.1| GNAS complex locus, isoform CRA_c [Homo sapiens]
Unigene10236_All	2211	5.4556	0.9622	3e-78	lupus la ribonucleoprotein [Aedes aegypti] >gi|108874874|gb|EAT39099.1| lupus la ribonucleoprotein [Aedes aegypti]
Unigene10237_All	520	0	0	--	--
Unigene10238_All	1051	4.4234	0	1e-132	projectin [Procambarus clarkii]
Unigene10239_All	560	0.4487	0	--	--
Unigene1023_All	955	5.6575	10.2212	1e-91	zinc finger protein 236, partial [Oryctolagus cuniculus]
Unigene10240_All	517	0.4861	0.9682	--	--
Unigene10241_All	498	2.2708	0.5026	3e-25	apoptosis-inducing factor 3-like [Xenopus (Silurana) tropicalis]
Unigene10242_All	509	2.4686	0.4917	--	--
Unigene10243_All	554	0	0	3e-10	similar to Pdia4 protein [Ciona intestinalis]
Unigene10244_All	703	4.8258	6.9425	--	--
Unigene10245_All	602	0.8349	0.4158	--	--
Unigene10246_All	484	9.8651	2.0685	6e-16	integrin alpha-ps [Aedes aegypti] >gi|108869905|gb|EAT34130.1| integrin alpha-ps [Aedes aegypti]
Unigene10247_All	505	0.4976	0	--	--
Unigene10248_All	549	0	0	5e-06	Adenomatous polyposis coli protein [Camponotus floridanus]
Unigene10249_All	564	1.3367	0.4438	--	--
Unigene1024_All	707	88.3281	8.3193	3e-23	serine protease [Aedes aegypti] >gi|108882943|gb|EAT47168.1| serine protease [Aedes aegypti]
Unigene10250_All	528	126.602	2.6072	7e-07	conserved hypothetical protein [Culex quinquefasciatus] >gi|167863488|gb|EDS26871.1| conserved hypothetical protein [Culex quinquefasciatus]
Unigene10251_All	518	18.1925	126.835	--	--
Unigene10252_All	1048	9.5916	1.6718	4e-09	Heterogeneous nuclear ribonucleoprotein Q [Harpegnathos saltator]
Unigene10253_All	617	0.4073	0	--	--
Unigene10254_All	526	5.9719	1.4275	2e-34	Mitogen-activated protein kinase kinase kinase kinase 5 [Harpegnathos saltator]
Unigene10255_All	801	0.3137	0	2e-79	similar to GF15407 [Hydra magnipapillata]
Unigene10256_All	555	0	1.3529	3e-20	ubiquitin specific protease 14-like isoform 1 [Saccoglossus kowalevskii]
Unigene10257_All	782	1.6068	1.1202	2e-07	T-cell receptor beta chain ANA 11 [Brugia malayi]
Unigene10258_All	537	0.702	0.233	1e-22	brain protein 44-like protein-like [Mus musculus]
Unigene10259_All	490	1.0257	1.0216	--	--
Unigene1025_All	503	92.9259	70.6577	1e-54	similar to AGAP005121-PB [Tribolium castaneum]
Unigene10260_All	456	7.4398	3.0188	3e-08	histone deacetylase 4, 5, putative [Ixodes scapularis] >gi|215509414|gb|EEC18867.1| histone deacetylase 4, 5, putative [Ixodes scapularis]
Unigene10261_All	520	7.0074	55.1114	--	--
Unigene10262_All	674	4.6606	1.8567	2e-14	similar to LReO_3 [Strongylocentrotus purpuratus] >gi|115924837|ref|XP_001189981.1| similar to LReO_3 [Strongylocentrotus purpuratus]
Unigene10263_All	627	0	0	--	--
Unigene10264_All	549	0.2289	0.2279	--	--
Unigene10265_All	1621	1.9378	2.8565	1e-131	bleomycin hydrolase [Culex quinquefasciatus] >gi|167866605|gb|EDS29988.1| bleomycin hydrolase [Culex quinquefasciatus]
Unigene10266_All	1469	0	0.0852	1e-07	Uncharacterized protein C16orf14-like protein [Camponotus floridanus]
Unigene10267_All	666	1.132	1.5032	--	--
Unigene10268_All	474	3.4461	3.6962	--	--
Unigene10269_All	507	2.4783	2.2215	4e-09	GD19728 [Drosophila simulans] >gi|194198024|gb|EDX11600.1| GD19728 [Drosophila simulans]
Unigene1026_All	539	19.8149	74.7612	--	--
Unigene10270_All	581	3.0277	2.8001	6e-10	Hypothetical 17.1 kDa protein in PUR5 3'region [Brugia malayi]
Unigene10271_All	548	0.2293	1.1418	3e-07	phosphoinositide-3-kinase, regulatory subunit 4 [Taeniopygia guttata]
Unigene10272_All	921	0.6821	2.4458	4e-21	similar to ubiquitin ligase E3 alpha [Tribolium castaneum]
Unigene10273_All	1321	7.4191	9.4734	2e-89	similar to ubiquitin specific peptidase 14 [Tribolium castaneum]
Unigene10274_All	862	0.2915	0.2904	4e-54	similar to AGAP010676-PA [Tribolium castaneum]
Unigene10275_All	813	4.9456	6.6189	4e-10	Extracellular sulfatase SULF-1-like protein [Harpegnathos saltator]
Unigene10276_All	583	1.7242	0.2147	--	--
Unigene10277_All	1129	1.0016	5.3205	--	--
Unigene10278_All	513	2.4493	0.7318	1e-11	Papilin [Harpegnathos saltator]
Unigene10279_All	487	4.3861	2.3127	4e-11	GE10774 [Drosophila yakuba] >gi|194185280|gb|EDW98891.1| GE10774 [Drosophila yakuba]
Unigene1027_All	768	8.0167	33.4043	3e-19	similar to CG1785-PA [Nasonia vitripennis]
Unigene10280_All	502	3.7545	0.7479	1e-25	Activating signal cointegrator 1 complex subunit 3 [Harpegnathos saltator]
Unigene10281_All	486	1.2927	0.515	4e-09	Ral guanine nucleotide dissociation stimulator-like 1 [Camponotus floridanus]
Unigene10282_All	3263	7.3164	1.1122	0	similar to nonsense-mediated mrna decay protein 1 (rent1) [Nasonia vitripennis]
Unigene10283_All	592	2.3347	1.057	--	--
Unigene10284_All	527	7.6296	1.4248	--	--
Unigene10285_All	512	2.9449	2.6886	--	--
Unigene10286_All	498	0.5046	0	--	--
Unigene10287_All	1345	7.4736	3.8148	1e-128	GA22927 [Drosophila pseudoobscura pseudoobscura] >gi|269969677|sp|B5DKS8.1|SWS_DROPS RecName: Full=Neuropathy target esterase sws; AltName: Full=Swiss cheese >gi|198145507|gb|EDY72128.1| GA22927 [Drosophila pseudoobscura pseudoobscura]
Unigene10288_All	377	21.997	815.924	1e-06	membrane associated thioredoxin [Cryptosporidium parvum Iowa II] >gi|46227005|gb|EAK87955.1| membrane associated thioredoxin [Cryptosporidium parvum Iowa II]
Unigene10289_All	989	10.2908	1.898	2e-20	GH14569 [Drosophila grimshawi] >gi|193898805|gb|EDV97671.1| GH14569 [Drosophila grimshawi]
Unigene1028_All	1721	3.5045	16.7973	2e-38	Thymidine kinase 2, mitochondrial precursor [Anoplopoma fimbria]
Unigene10290_All	540	1.8615	0	2e-08	hypothetical protein [Nasonia vitripennis]
Unigene10291_All	888	6.0844	1.8321	2e-21	Nuclear receptor coactivator 6 [Harpegnathos saltator]
Unigene10292_All	755	0.4993	0.3315	9e-47	ankyrin repeat containing protein [Ixodes scapularis] >gi|215504353|gb|EEC13847.1| ankyrin repeat containing protein [Ixodes scapularis]
Unigene10293_All	935	0.2688	0	--	--
Unigene10294_All	892	2.8173	0.4209	--	--
Unigene10295_All	4095	1.258	2.7199	0	similar to MGC80357 protein [Nasonia vitripennis]
Unigene10296_All	705	0.1782	1.4201	4e-34	similar to BRCA1/BRCA2-containing complex subunit 3 [Strongylocentrotus purpuratus] >gi|115728682|ref|XP_780255.2| similar to BRCA1/BRCA2-containing complex subunit 3 [Strongylocentrotus purpuratus]
Unigene10297_All	1339	0	0.7477	1e-109	Rho-associated protein kinase 2 [Harpegnathos saltator]
Unigene10298_All	526	2.3888	0.4758	3e-20	similar to ENSANGP00000018661 [Nasonia vitripennis]
Unigene10299_All	1263	5.3722	8.7194	6e-13	similar to blood island enriched kruppel like factor [Gallus gallus]
Unigene1029_All	669	12.2081	9.7272	1e-110	Myosin-VIIa [Harpegnathos saltator]
Unigene102_All	1470	7.4364	20.006	8e-76	trimethyllysine hydroxylase, epsilon [Xenopus (Silurana) tropicalis] >gi|134025492|gb|AAI35631.1| LOC100124877 protein [Xenopus (Silurana) tropicalis]
Unigene10300_All	550	1.3707	1.1377	--	--
Unigene10301_All	503	3.9968	0.7464	--	--
Unigene10302_All	970	2.0726	0.258	--	--
Unigene10303_All	515	0	0	--	--
Unigene10304_All	648	5.2354	7.5318	--	--
Unigene10305_All	964	1.6944	1.6876	--	--
Unigene10306_All	509	1.2343	0.2459	--	--
Unigene10307_All	826	0	0	3e-86	AGAP009600-PA [Anopheles gambiae str. PEST] >gi|157013889|gb|EAA14456.4| AGAP009600-PA [Anopheles gambiae str. PEST]
Unigene10308_All	532	1.8895	3.058	9e-06	similar to Ku (p70/p80) protein [Gallus gallus]
Unigene10309_All	1516	0.3315	0.6604	1e-26	similar to broad-complex core-protein [Nasonia vitripennis]
Unigene1030_All	1031	4.8749	2.549	2e-12	similar to zinc finger protein 650 [Tribolium castaneum]
Unigene10310_All	4312	37.998	0.7836	1e-53	similar to CG13913 CG13913-PA [Tribolium castaneum]
Unigene10311_All	603	0.2084	0.2075	2e-17	GD17060 [Drosophila simulans] >gi|194204138|gb|EDX17714.1| GD17060 [Drosophila simulans]
Unigene10312_All	646	7.1967	5.2305	7e-80	similar to carbamoyl-phosphate synthase large chain [Tribolium castaneum]
Unigene10313_All	666	5.4712	1.879	3e-09	hypothetical protein NEMVEDRAFT_v1g71141 [Nematostella vectensis] >gi|156207466|gb|EDO29384.1| predicted protein [Nematostella vectensis]
Unigene10314_All	1668	1.8079	2.7009	5e-56	Growth inhibition and differentiation-related protein 88-like protein [Camponotus floridanus]
Unigene10315_All	501	1.254	2.2481	--	--
Unigene10316_All	503	0.4996	0.4976	--	--
Unigene10317_All	1305	2.7922	6.1373	--	--
Unigene10318_All	1046	4.0842	37.3278	6e-93	20S proteasome B2 subunit [Anastrepha suspensa]
Unigene10319_All	523	2.883	0	7e-07	similar to ankyrin 2,3/unc44 [Tribolium castaneum]
Unigene1031_All	1155	11.0963	47.3488	--	--
Unigene10320_All	261	9.6283	7.1922	--	--
Unigene10321_All	549	1.3732	0.2279	--	--
Unigene10322_All	2398	1.2575	1.6178	3e-81	LOW QUALITY PROTEIN: ubiquitin carboxyl-terminal hydrolase 24-like [Xenopus (Silurana) tropicalis]
Unigene10323_All	541	1.6258	0	1e-07	AGAP006797-PA [Anopheles gambiae str. PEST] >gi|157020654|gb|EAA04178.4| AGAP006797-PA [Anopheles gambiae str. PEST]
Unigene10324_All	509	4.9371	1.2293	--	--
Unigene10325_All	538	0	0	3e-09	similar to CDNA sequence BC060632 [Tribolium castaneum]
Unigene10326_All	1769	0.6393	0.7074	1e-139	similar to GA22169-PA [Tribolium castaneum]
Unigene10327_All	2675	5.8245	3.6023	2e-32	similar to mannosidase alpha class 2a [Tribolium castaneum]
Unigene10328_All	1012	4.4698	3.4625	1e-11	predicted protein [Nematostella vectensis] >gi|156221859|gb|EDO42709.1| predicted protein [Nematostella vectensis]
Unigene10329_All	642	1.37	0	8e-29	similar to E1a binding protein P400 [Tribolium castaneum]
Unigene1032_All	507	194.299	29.1262	--	--
Unigene10330_All	507	2.974	1.481	--	--
Unigene10331_All	671	1.6853	0	1e-08	similar to GA16823-PA [Nasonia vitripennis]
Unigene10332_All	507	6.1957	3.4556	--	--
Unigene10333_All	1288	0.1951	0.1943	--	--
Unigene10334_All	487	0	0	--	--
Unigene10335_All	554	4.0825	0.2259	3e-07	similar to armadillo repeat-containing protein 8 [Tribolium castaneum]
Unigene10336_All	514	1.7112	1.7043	4e-06	cDNA sequence BC016201 isoform 1 [Mus musculus] >gi|304569480|gb|ADM45272.1| cGMP-gated cation channel beta subunit [Mus musculus]
Unigene10337_All	531	0.2366	0	5e-29	n-acetyltransferase 10-like [Sus scrofa]
Unigene10338_All	684	0.7348	0.3659	3e-14	Protein furry [Harpegnathos saltator]
Unigene10339_All	548	6.4201	2394.63	8e-06	hypothetical protein [Leishmania major strain Friedlin] >gi|68124951|emb|CAJ02606.1| hypothetical protein LMJF_12_0470 [Leishmania major strain Friedlin]
Unigene1033_All	827	5.9254	22.0931	9e-26	Protein downstream neighbor of son-like protein [Camponotus floridanus]
Unigene10340_All	345	5.0988	0	--	--
Unigene10341_All	545	2.7666	2.7555	3e-17	F-box/LRR-repeat protein 20 [Camponotus floridanus]
Unigene10342_All	504	0	0	--	--
Unigene10343_All	531	2.1297	0.4714	3e-08	similar to LOC431877 protein [Ciona intestinalis]
Unigene10344_All	742	3.0481	0.1687	2e-54	dynactin subunit 5 [Penaeus monodon]
Unigene10345_All	905	1.9438	1.6594	7e-07	AGAP011100-PA [Anopheles gambiae str. PEST] >gi|116131757|gb|EAA05228.4| AGAP011100-PA [Anopheles gambiae str. PEST]
Unigene10346_All	526	2.8665	0.4758	--	--
Unigene10347_All	1164	3.994	0.7526	2e-24	similar to organic anion transporter [Tribolium castaneum]
Unigene10348_All	1096	0.9172	0	2e-65	Splicing factor U2af 38 kDa subunit [Camponotus floridanus] >gi|307174220|gb|EFN64865.1| Splicing factor U2af 38 kDa subunit [Camponotus floridanus]
Unigene10349_All	716	26.6743	1.0487	9e-35	zinc proteinase Mpc1 [Paralithodes camtschaticus]
Unigene1034_All	474	3.181	7.1284	9e-06	diaphanous homolog 1 (Drosophila) [Equus caballus]
Unigene10350_All	1176	1.4958	9.5773	2e-86	gemin 4 [Taeniopygia guttata]
Unigene10351_All	501	1.5048	1.2489	--	--
Unigene10352_All	507	0.7435	14.5631	7e-11	GJ24396 [Drosophila virilis] >gi|194152439|gb|EDW67873.1| GJ24396 [Drosophila virilis]
Unigene10353_All	474	3.7112	0.528	--	--
Unigene10354_All	530	1.1854	0.4722	--	--
Unigene10355_All	597	9.892	0.4192	--	--
Unigene10356_All	536	0	0	1e-06	novel protein similar to H.sapiens TRIP11, thyroid hormone receptor interactor 11 (TRIP11) [Danio rerio]
Unigene10357_All	623	0.2017	0	9e-32	zinc finger protein Xfin-like [Xenopus (Silurana) tropicalis]
Unigene10358_All	2151	42.409	0.989	8e-57	reverse transcriptase [Ciona intestinalis]
Unigene10359_All	958	0.2623	0.2613	2e-36	3'(2'),5'-bisphosphate nucleotidase 1-like [Apis mellifera]
Unigene1035_All	1012	4.0973	7.7906	6e-39	similar to rab gdp/gtp exchange factor [Nasonia vitripennis]
Unigene10360_All	571	5.2813	1.0958	9e-12	similar to VPS13C-1A protein [Strongylocentrotus purpuratus] >gi|115943043|ref|XP_780744.2| similar to VPS13C-1A protein [Strongylocentrotus purpuratus]
Unigene10361_All	556	4.2938	1.1254	4e-10	similar to FAT tumor suppressor homolog 1, partial [Ornithorhynchus anatinus]
Unigene10362_All	504	2.7424	1.4898	--	--
Unigene10363_All	527	0	0	--	--
Unigene10364_All	577	1.5243	1.7351	1e-11	multicopper oxidase [Aedes aegypti] >gi|108876239|gb|EAT40464.1| multicopper oxidase [Aedes aegypti]
Unigene10365_All	2008	7.0084	2.3683	1e-57	Hamartin [Camponotus floridanus]
Unigene10366_All	530	1.6595	0.7084	--	--
Unigene10367_All	720	3.3158	1.5643	--	--
Unigene10368_All	522	1.4443	1.1987	--	--
Unigene10369_All	645	1.9481	9.313	--	--
Unigene1036_All	703	8.9367	53.7602	6e-52	similar to AGAP009638-PA [Tribolium castaneum]
Unigene10370_All	566	3.9959	0.2211	9e-08	Disrupted in renal carcinoma protein 2-like protein [Camponotus floridanus]
Unigene10371_All	944	0.6655	0.6628	1e-69	projectin [Procambarus clarkii]
Unigene10372_All	478	0	0	--	--
Unigene10373_All	499	2.0144	2.7587	--	--
Unigene10374_All	803	0.1565	0	1e-14	similar to zinc finger, FYVE domain containing 9 isoform 1 isoform 3 [Canis familiaris]
Unigene10375_All	582	0	0	1e-09	Chain B, Crystal Structure Of A Bovine Rabex-5 Fragment Complexed With Ubiquitin >gi|90109437|pdb|2FIF|B Chain B, Crystal Structure Of A Bovine Rabex-5 Fragment Complexed With Ubiquitin >gi|90109439|pdb|2FIF|D Chain D, Crystal Structure Of A Bovine Rabex-5 Fragment Complexed With Ubiquitin >gi|90109441|pdb|2FIF|F Chain F, Crystal Structure Of A Bovine Rabex-5 Fragment Complexed With Ubiquitin
Unigene10376_All	537	0.234	0	--	--
Unigene10377_All	509	2.2217	1.4752	2e-33	Another transcription unit protein [Camponotus floridanus]
Unigene10378_All	575	1.9667	0.2176	3e-28	Histone-lysine N-methyltransferase, H3 lysine-79 specific [Harpegnathos saltator]
Unigene10379_All	542	0	0	8e-14	enhancer of polycomb 1-like [Saccoglossus kowalevskii]
Unigene1037_All	402	2.5005	8.7165	--	--
Unigene10380_All	559	0.4496	1.3432	1e-17	tRNA methyltransferase 11-2 homolog [Saccoglossus kowalevskii]
Unigene10381_All	903	0	1.1087	4e-25	DNA directed RNA polymerase II polypeptide C [Oryctolagus cuniculus]
Unigene10382_All	457	0.8248	1.3692	--	--
Unigene10383_All	2142	1.3492	0.9932	2e-49	similar to rCG36659 [Tribolium castaneum]
Unigene10384_All	887	2.4082	0	2e-06	splicing factor 1 isoform 1 [Pan troglodytes]
Unigene10385_All	526	0.4778	0	--	--
Unigene10386_All	709	6.9116	0.706	--	--
Unigene10387_All	1033	1.4596	2.3018	1e-131	similar to phosphatidylinositol-binding clathrin assembly protein [Nasonia vitripennis]
Unigene10388_All	1748	0	0	1e-32	glucocorticoid induced transcript 1-like [Nasonia vitripennis]
Unigene10389_All	1958	5.2621	1.5339	1e-76	doublecortin-like protein kinase [Saccoglossus kowalevskii] >gi|268054037|gb|ACY92505.1| doublecortin-like protein kinase [Saccoglossus kowalevskii]
Unigene1038_All	1329	4.9163	15.7254	1e-165	Dual specificity tyrosine-phosphorylation-regulated kinase 2 [Camponotus floridanus]
Unigene10390_All	624	3.8259	1.0028	1e-16	chaoptic [Tribolium castaneum]
Unigene10391_All	531	3.5494	0.4714	1e-20	similar to ENSANGP00000015879 [Nasonia vitripennis]
Unigene10392_All	522	1.2035	2.6371	--	--
Unigene10393_All	1117	2.6997	1.0083	6e-84	WD repeat-containing protein 26-like [Acyrthosiphon pisum]
Unigene10394_All	876	2.4384	14.7144	--	--
Unigene10395_All	1476	0	0	4e-22	fruitless [Tribolium castaneum]
Unigene10396_All	516	0	0	--	--
Unigene10397_All	553	0.4544	0	4e-06	Hypothetical protein CBG10141 [Caenorhabditis briggsae]
Unigene10398_All	563	1.5623	0.2223	--	--
Unigene10399_All	524	0.9592	0	--	--
Unigene1039_All	1454	32.0606	39.3334	3e-69	Protein RER1 [Lepeophtheirus salmonis]
Unigene103_All	1401	8.3408	25.5468	2e-69	similar to P-element somatic inhibitor [Tribolium castaneum]
Unigene10400_All	539	4.1961	1.3931	--	--
Unigene10401_All	681	2.2141	1.2864	--	--
Unigene10402_All	1139	6.8396	5.9331	1e-06	Protein outspread [Camponotus floridanus]
Unigene10403_All	521	0.9647	0.2402	6e-08	similar to Protein Shroom [Tribolium castaneum]
Unigene10404_All	495	0.5077	0.2528	--	--
Unigene10405_All	545	2.5361	1.837	--	--
Unigene10406_All	993	0.7592	1.5123	6e-55	HSPC303-like [Saccoglossus kowalevskii]
Unigene10407_All	944	3.0614	1.7234	--	--
Unigene10408_All	544	2.7717	0.6901	--	--
Unigene10409_All	641	0.5881	0.3905	1e-21	similar to IP14385p [Nasonia vitripennis]
Unigene1040_All	714	1.9358	13.6712	3e-12	rCG54054-like [Rattus norvegicus]
Unigene10410_All	1300	0.3866	0.0963	2e-78	WD repeat-containing protein 37 [Harpegnathos saltator]
Unigene10411_All	534	2.1177	1.4061	4e-14	zinc finger protein 208 [Bos taurus]
Unigene10412_All	531	1.893	0.2357	--	--
Unigene10413_All	568	0	0	2e-19	COP9 signalosome complex subunit 3 [Bos taurus] >gi|162416117|sp|A6H7B5.1|CSN3_BOVIN RecName: Full=COP9 signalosome complex subunit 3; Short=SGN3; Short=Signalosome subunit 3 >gi|148877451|gb|AAI46184.1| COPS3 protein [Bos taurus] >gi|296476711|gb|DAA18826.1| COP9 signalosome complex subunit 3 [Bos taurus]
Unigene10414_All	522	1.4443	0	1e-12	Breakpoint cluster region protein [Harpegnathos saltator]
Unigene10415_All	537	0.9359	0	--	--
Unigene10416_All	1262	7.6664	0.8925	8e-16	similar to serine threonine-protein kinase [Tribolium castaneum]
Unigene10417_All	494	0	0	--	--
Unigene10418_All	482	1.5641	0.2596	9e-07	hCG1793893 [Homo sapiens]
Unigene10419_All	860	2.0455	2.7648	--	--
Unigene1041_All	570	3.9679	21.5159	--	--
Unigene10420_All	935	4.3003	0.8031	4e-33	zinc finger protein 91 [Bos taurus]
Unigene10421_All	727	5.7035	0	1e-24	CBR-CTL-3 protein [Caenorhabditis briggsae AF16]
Unigene10422_All	563	2.6781	0	1e-20	similar to protein phosphatase-5 [Nasonia vitripennis]
Unigene10423_All	1525	7.1682	0	4e-13	oxygenase [Oplophorus gracilorostris]
Unigene10424_All	985	0.5103	0.127	9e-54	KIF21A protein-like [Saccoglossus kowalevskii]
Unigene10425_All	1587	7.3632	3.3119	7e-13	GH10507 [Drosophila grimshawi] >gi|193904565|gb|EDW03432.1| GH10507 [Drosophila grimshawi]
Unigene10426_All	1089	0.2308	0.2298	5e-29	CG11092-like [Saccoglossus kowalevskii]
Unigene10427_All	1351	0.744	0.1853	2e-46	similar to ATP-dependent RNA helicase DBP9 [Tribolium castaneum]
Unigene10428_All	830	11.0511	2.4124	7e-16	similar to cpg binding protein [Strongylocentrotus purpuratus]
Unigene10429_All	598	0.8405	0.8371	--	--
Unigene1042_All	912	8.542	7.1354	1e-19	gigaxonin [Callithrix jacchus]
Unigene10430_All	487	2.0641	1.5418	5e-21	bromodomain and PHD finger containing, 1 [Oryzias latipes] >gi|237823392|dbj|BAH59433.1| bromodomain and PHD finger containing, 1 [Oryzias latipes]
Unigene10431_All	530	0.2371	0.7084	--	--
Unigene10432_All	530	2.1337	0	2e-12	GK13610 [Drosophila willistoni] >gi|194168666|gb|EDW83567.1| GK13610 [Drosophila willistoni]
Unigene10433_All	934	1.2108	0.8039	--	--
Unigene10434_All	502	0.2503	0	--	--
Unigene10435_All	526	3.1054	0.4758	--	--
Unigene10436_All	498	1.5139	2.0103	--	--
Unigene10437_All	501	1.0032	2.7477	7e-13	Hypothetical protein CBG22019 [Caenorhabditis briggsae]
Unigene10438_All	576	0.6544	0	--	--
Unigene10439_All	1133	0.3327	0.1105	2e-09	transmembrane protein C5orf28 homolog [Xenopus laevis] >gi|82182640|sp|Q6DED9.1|CE028_XENLA RecName: Full=Transmembrane protein C5orf28 homolog >gi|50416514|gb|AAH77184.1| MGC78830 protein [Xenopus laevis]
Unigene1043_All	669	4.5076	3.5542	6e-25	Cell division protein kinase 4 [Caligus clemensi]
Unigene10440_All	491	4.8622	0	9e-20	Cold-inducible RNA-binding protein [Salmo salar]
Unigene10441_All	524	0	0	--	--
Unigene10442_All	1854	9.0137	4.455	--	--
Unigene10443_All	598	3.572	2.302	--	--
Unigene10444_All	1179	2.984	6.0502	--	--
Unigene10445_All	520	2.658	0	2e-16	ATP synthase subunit beta, mitochondrial [Acyrthosiphon pisum]
Unigene10446_All	506	2.4832	0.4946	--	--
Unigene10447_All	540	1.1634	0.4635	--	--
Unigene10448_All	653	3.8484	11.4987	2e-14	GH21314 [Drosophila grimshawi] >gi|193902354|gb|EDW01221.1| GH21314 [Drosophila grimshawi]
Unigene10449_All	519	0	0	9e-14	copine IV-like [Saccoglossus kowalevskii]
Unigene1044_All	490	5.1286	30.3921	3e-15	similar to MGC80215 protein, partial [Strongylocentrotus purpuratus] >gi|115898671|ref|XP_791901.2| similar to MGC80215 protein, partial [Strongylocentrotus purpuratus]
Unigene10450_All	658	0.191	0.3804	4e-43	Carbonyl reductase [NADPH] 1 [Harpegnathos saltator]
Unigene10451_All	518	0.2426	0	--	--
Unigene10452_All	460	4.3704	4.0808	8e-23	likely orthologue of H. sapiens chromosome 20 open reading frame 95 (C20orf95)-like [Rattus norvegicus]
Unigene10453_All	549	1.1444	0.2279	--	--
Unigene10454_All	605	15.161	1.4479	5e-18	GA25136 [Drosophila pseudoobscura pseudoobscura] >gi|198137372|gb|EDY69575.1| GA25136 [Drosophila pseudoobscura pseudoobscura]
Unigene10455_All	523	0	0	--	--
Unigene10456_All	515	1.7079	0.243	--	--
Unigene10457_All	547	2.9862	0.6863	--	--
Unigene10458_All	615	0.2043	0	3e-43	similar to dynamin [Nasonia vitripennis]
Unigene10459_All	2136	1.1765	0.8202	1e-114	similar to ENSANGP00000011450 [Nasonia vitripennis]
Unigene1045_All	1645	11.6866	19.0949	6e-94	similar to AGAP007723-PA [Tribolium castaneum]
Unigene10460_All	1116	4.0532	5.9432	6e-46	abhydrolase domain containing 14B-like [Saccoglossus kowalevskii]
Unigene10461_All	937	5.2298	0.5342	--	--
Unigene10462_All	1336	1.5048	0.7494	1e-38	similar to ENSANGP00000017873 [Nasonia vitripennis]
Unigene10463_All	514	0.7334	1.7043	--	--
Unigene10464_All	613	2.2547	0.6124	--	--
Unigene10465_All	579	0.434	0	--	--
Unigene10466_All	576	1.527	0.6518	4e-18	sterol regulatory element-binding protein cleavage-activating protein-like isoform 1 [Acyrthosiphon pisum]
Unigene10467_All	920	4.6436	1.9044	4e-77	Phosphatidate cytidylyltransferase, photoreceptor-specific [Harpegnathos saltator]
Unigene10468_All	520	2.1747	0	--	--
Unigene10469_All	500	0	0.7509	2e-18	cyclin H [Scylla paramamosain]
Unigene1046_All	588	8.5476	125.569	--	--
Unigene10470_All	2945	0	0	0	similar to GA13798-PA [Tribolium castaneum]
Unigene10471_All	801	1.5687	0.3125	4e-06	peroxisome proliferator-activated receptor gamma [Oncorhynchus keta]
Unigene10472_All	590	2.3426	10.3933	--	--
Unigene10473_All	533	4.0076	1.4087	--	--
Unigene10474_All	1320	1.9038	0.5688	--	--
Unigene10475_All	827	2.431	0	4e-17	U88 [Brugia malayi]
Unigene10476_All	512	4.9082	13.6876	--	--
Unigene10477_All	828	0	0	6e-38	similar to YTH domain family, member 3 [Tribolium castaneum]
Unigene10478_All	961	3.661	9.2458	2e-08	mucin-associated surface protein (MASP) [Trypanosoma cruzi strain CL Brener]
Unigene10479_All	1514	3.3197	4.2155	1e-20	similar to eIF2B-gamma protein [Tribolium castaneum]
Unigene1047_All	393	10.5507	44.8989	--	--
Unigene10480_All	511	3.9342	1.7143	4e-19	similar to CG2747 CG2747-PB [Tribolium castaneum]
Unigene10481_All	840	1.6454	0.8939	1e-38	similar to dynactin [Tribolium castaneum]
Unigene10482_All	545	2.5361	3.9036	--	--
Unigene10483_All	501	2.508	4.4962	2e-06	midline-2-like [Xenopus (Silurana) tropicalis]
Unigene10484_All	594	2.3268	3.1602	--	--
Unigene10485_All	2013	0.3745	0	7e-82	low-density lipoprotein receptor (ldl) [Aedes aegypti] >gi|108873980|gb|EAT38205.1| low-density lipoprotein receptor (ldl) [Aedes aegypti]
Unigene10486_All	545	0	0	9e-10	poly (ADP-ribose) polymerase family, member 2-like [Saccoglossus kowalevskii]
Unigene10487_All	504	1.9944	0	6e-20	similar to 17-beta-hydroxysteroid dehydrogenase type 4 [Strongylocentrotus purpuratus] >gi|115969616|ref|XP_001188817.1| similar to 17-beta-hydroxysteroid dehydrogenase type 4 [Strongylocentrotus purpuratus]
Unigene10488_All	641	4.7045	4.4903	--	--
Unigene10489_All	512	5.6444	0.2444	--	--
Unigene1048_All	524	845.019	896.306	3e-66	ribosomal protein S24 [Rimicaris exoculata]
Unigene10490_All	495	2.7922	0	1e-15	Vacuolar protein sorting-associated protein 13A [Camponotus floridanus]
Unigene10491_All	500	0.2513	0	--	--
Unigene10492_All	527	5.0069	7.5989	6e-06	hypothetical protein [Monosiga brevicollis MX1] >gi|163774752|gb|EDQ88379.1| predicted protein [Monosiga brevicollis MX1]
Unigene10493_All	518	3.3959	2.8991	1e-32	trehalase 1 [Callinectes sapidus]
Unigene10494_All	590	1.9167	2.7574	--	--
Unigene10495_All	495	0.2538	0	--	--
Unigene10496_All	559	0.2248	0	--	--
Unigene10497_All	1149	6.9988	0.3267	--	--
Unigene10498_All	595	2.3229	1.6826	1e-28	similar to stromal antigen [Nasonia vitripennis]
Unigene10499_All	486	1.0342	0	5e-12	UDP-xylose and UDP-N-acetylglucosamine transporter-like [Harpegnathos saltator]
Unigene1049_All	596	7.3788	13.4383	--	--
Unigene104_All	1205	9.5932	9.5545	4e-07	GJ11255 [Drosophila virilis] >gi|194155781|gb|EDW70965.1| GJ11255 [Drosophila virilis]
Unigene10500_All	537	0	0	3e-13	similar to enhancer of polycomb [Nasonia vitripennis]
Unigene10501_All	806	3.2738	1.2421	7e-19	glyoxylate reductase/hydroxypyruvate reductase, gene 1 [Xenopus (Silurana) tropicalis]
Unigene10502_All	494	7.6306	4.0532	--	--
Unigene10503_All	879	4.8602	0	2e-07	lectin C [Marsupenaeus japonicus]
Unigene10504_All	499	1.0072	0.5016	--	--
Unigene10505_All	314	5.6022	0.7971	6e-17	similar to polyprotein [Hydra magnipapillata]
Unigene10506_All	571	2.6406	1.5342	8e-13	polybromo-1 [Culex quinquefasciatus] >gi|167865675|gb|EDS29058.1| polybromo-1 [Culex quinquefasciatus]
Unigene10507_All	486	1.5512	3.605	1e-21	Neurobeachin [Harpegnathos saltator]
Unigene10508_All	857	0	0	2e-21	GD24595 [Drosophila simulans] >gi|194202890|gb|EDX16466.1| GD24595 [Drosophila simulans]
Unigene10509_All	1840	3.3461	3.1966	2e-79	Bystin [Harpegnathos saltator]
Unigene1050_All	601	22.9975	284.645	2e-08	reverse transcriptase [Chelonia mydas]
Unigene10510_All	546	3.682	1.146	--	--
Unigene10511_All	534	0.4706	0.7031	9e-07	WD repeat-containing protein 55 [Harpegnathos saltator]
Unigene10512_All	495	0.7615	1.0113	2e-22	similar to 26S proteasome subunit [Tribolium castaneum]
Unigene10513_All	1220	2.0598	3.2825	1e-19	GA17505 [Drosophila pseudoobscura pseudoobscura] >gi|198132655|gb|EAL28628.2| GA17505 [Drosophila pseudoobscura pseudoobscura]
Unigene10514_All	560	4.7119	1.7878	--	--
Unigene10515_All	730	0.6885	0	1e-74	Protein FAM76A [Harpegnathos saltator]
Unigene10516_All	532	2.3618	0	4e-13	f-box and wd40 domain protein 7 (fbw7) [Aedes aegypti] >gi|108872497|gb|EAT36722.1| f-box and wd40 domain protein 7 (fbw7) [Aedes aegypti]
Unigene10517_All	563	2.455	12.4477	--	--
Unigene10518_All	795	2.0547	3.4631	--	--
Unigene10519_All	523	0.4805	0	4e-07	glycosyltransferase-like domain-containing protein 1-like [Sus scrofa]
Unigene1051_All	637	2.9588	6.6796	5e-39	sorting nexin 14 [Xenopus (Silurana) tropicalis] >gi|111305933|gb|AAI21403.1| sorting nexin 14 [Xenopus (Silurana) tropicalis]
Unigene10520_All	521	0	0	5e-26	similar to KIAA1033 [Taeniopygia guttata]
Unigene10521_All	495	2.2845	5.3091	--	--
Unigene10522_All	502	1.2515	0	--	--
Unigene10523_All	349	6.8405	11.8331	--	--
Unigene10524_All	829	3.1829	1.2077	5e-11	similar to suppressor of yeast mitotic catastrophe [Tribolium castaneum]
Unigene10525_All	536	0.2344	0.2335	1e-18	CDKAL1-like protein [Harpegnathos saltator]
Unigene10526_All	548	0	0	--	--
Unigene10527_All	593	1.4832	3.7986	--	--
Unigene10528_All	1444	3.8287	0.6067	9e-54	similar to CG14435 CG14435-PA [Tribolium castaneum]
Unigene10529_All	736	0	0	6e-63	exocyst complex component 5-like [Apis mellifera]
Unigene1052_All	697	12.9796	317.976	3e-28	histone H1-like [Saccoglossus kowalevskii]
Unigene10530_All	535	3.7578	0.9357	3e-20	GA16976 [Drosophila pseudoobscura pseudoobscura] >gi|198146402|gb|EAL31752.2| GA16976 [Drosophila pseudoobscura pseudoobscura]
Unigene10531_All	511	0.2459	0	1e-29	Protein yippee-like 5 [Harpegnathos saltator]
Unigene10532_All	894	0.8433	0.8399	--	--
Unigene10533_All	582	0	0	--	--
Unigene10534_All	469	0.8037	1.0673	--	--
Unigene10535_All	836	0	0	--	--
Unigene10536_All	509	1.2343	0	--	--
Unigene10537_All	682	1.6581	14.3126	--	--
Unigene10538_All	539	1.1656	4.8757	2e-11	GK17115 [Drosophila willistoni] >gi|194157748|gb|EDW72649.1| GK17115 [Drosophila willistoni]
Unigene10539_All	519	1.2105	1.2056	1e-12	tuberin [Aedes aegypti] >gi|108871026|gb|EAT35251.1| tuberin [Aedes aegypti]
Unigene1053_All	952	5.5434	54.0274	--	--
Unigene10540_All	938	0.134	0	2e-22	Hypothetical protein T17H7.1 [Caenorhabditis elegans]
Unigene10541_All	857	1.7594	11.244	--	--
Unigene10542_All	515	0	0	2e-31	rcd1 (required for cell differentiation) homolog 1-like [Saccoglossus kowalevskii]
Unigene10543_All	548	3.8979	0.6851	2e-06	notch [Aedes aegypti] >gi|108875951|gb|EAT40176.1| notch [Aedes aegypti]
Unigene10544_All	566	0.444	0.4422	--	--
Unigene10545_All	513	6.1233	0.9758	--	--
Unigene10546_All	975	0.1289	0.2567	2e-64	GH22344 [Drosophila grimshawi] >gi|193899686|gb|EDV98552.1| GH22344 [Drosophila grimshawi]
Unigene10547_All	506	1.4899	1.9786	--	--
Unigene10548_All	526	3.1054	2.6171	8e-19	GH17907 [Drosophila grimshawi] >gi|193896502|gb|EDV95368.1| GH17907 [Drosophila grimshawi]
Unigene10549_All	652	6.9377	0.3839	2e-12	endothelin-converting enzyme 1-like [Saccoglossus kowalevskii]
Unigene1054_All	602	5.8442	8.1073	--	--
Unigene10550_All	524	0.7194	0	--	--
Unigene10551_All	1790	0.2106	0.6991	3e-11	viral A-type inclusion protein [Trichomonas vaginalis G3]
Unigene10552_All	1302	0.0965	0	2e-90	similar to AGAP011768-PA [Tribolium castaneum]
Unigene10553_All	536	3.9852	11.6739	--	--
Unigene10554_All	682	1.8424	2.7524	2e-08	similar to cell division cycle 27 [Nasonia vitripennis]
Unigene10555_All	512	5.399	146.164	4e-07	hypothetical protein EAI_13325 [Harpegnathos saltator]
Unigene10556_All	593	0.6357	0.4221	3e-19	similar to CG3625 CG3625-PB isoform 2 [Tribolium castaneum]
Unigene10557_All	563	2.0086	0.8891	--	--
Unigene10558_All	519	7.263	1.6879	2e-07	similar to AGAP006608-PB [Tribolium castaneum]
Unigene10559_All	634	10.1075	21.3179	--	--
Unigene1055_All	1868	12.982	24.3856	2e-94	novel protein similar to vertebrate golgi-specific brefeldin A resistance factor 1 (GBF1) [Danio rerio]
Unigene10560_All	519	0.2421	0	--	--
Unigene10561_All	517	0.4861	0	2e-15	structural maintenance of chromosomes protein 3 [Culex quinquefasciatus] >gi|167864265|gb|EDS27648.1| structural maintenance of chromosomes protein 3 [Culex quinquefasciatus]
Unigene10562_All	519	2.1789	13.0207	--	--
Unigene10563_All	536	2.8131	0.2335	--	--
Unigene10564_All	512	0	0	3e-20	GD20137 [Drosophila simulans] >gi|194198805|gb|EDX12381.1| GD20137 [Drosophila simulans]
Unigene10565_All	488	0.515	0.2564	--	--
Unigene10566_All	565	2.6687	1.9934	--	--
Unigene10567_All	500	48.5008	1.0012	--	--
Unigene10568_All	937	9.9232	1.202	3e-11	RecName: Full=Basic proline-rich protein; Contains: RecName: Full=Proline-rich peptide SP-A; Short=PRP-SP-A; Contains: RecName: Full=Proline-rich peptide SP-B; Short=PRP-SP-B; Contains: RecName: Full=Parotid hormone; AltName: Full=PH-Ab; Flags: Precursor
Unigene10569_All	520	0	0	1e-22	similar to sec-23 interacting protein P125 [Nasonia vitripennis]
Unigene1056_All	1513	6.2285	32.8368	1e-136	Microspherule protein 1 [Harpegnathos saltator]
Unigene10570_All	972	6.3342	2.06	3e-34	Neurexin-4 [Camponotus floridanus]
Unigene10571_All	549	2.7464	0	--	--
Unigene10572_All	656	1.9154	2.6708	1e-11	AGAP002960-PA [Anopheles gambiae str. PEST] >gi|116129315|gb|EAA44850.3| AGAP002960-PA [Anopheles gambiae str. PEST]
Unigene10573_All	1174	1.3914	0.2132	5e-10	PAB-dependent poly(A)-specific ribonuclease subunit 3 [Oryctolagus cuniculus]
Unigene10574_All	879	2.1442	2.2779	--	--
Unigene10575_All	491	2.3032	0.2549	1e-16	mitochondrial translation elongation factor Tu [Glossina morsitans morsitans]
Unigene10576_All	693	6.8899	1.0835	8e-19	GPI inositol-deacylase [Danio rerio]
Unigene10577_All	536	9.6113	4.2026	--	--
Unigene10578_All	1353	1.2073	1.5724	--	--
Unigene10579_All	608	0	0	--	--
Unigene1057_All	357	7.3912	9.4647	9e-13	GA23437 [Drosophila pseudoobscura pseudoobscura] >gi|198150417|gb|EDY73721.1| GA23437 [Drosophila pseudoobscura pseudoobscura]
Unigene10580_All	551	0	0	--	--
Unigene10581_All	973	0.2583	0	5e-71	similar to rho-associated protein kinase 1 [Tribolium castaneum]
Unigene10582_All	762	1.4841	0.6569	2e-63	Nucleolar protein K01G5.5 [Brugia malayi]
Unigene10583_All	596	2.7407	16.7978	1e-06	dopamine receptor D4 [Homo sapiens]
Unigene10584_All	486	1.0342	0	--	--
Unigene10585_All	593	1.2713	0	--	--
Unigene10586_All	528	2.8557	0.711	--	--
Unigene10587_All	568	1.3273	0.2203	--	--
Unigene10588_All	515	7.0754	20.6548	--	--
Unigene10589_All	949	0.7944	0.5275	4e-14	kunitz-like protein [Ornithodoros parkeri]
Unigene1058_All	815	4.7793	9.6737	3e-72	Williams Beuren syndrome chromosome region 22 protein [Danio rerio] >gi|126631536|gb|AAI33942.1| Zgc:162306 protein [Danio rerio]
Unigene10590_All	1261	11.7579	5.5575	1e-12	T-cell receptor beta chain ANA 11 [Brugia malayi]
Unigene10591_All	530	2.1337	1.889	6e-13	AGAP002757-PA [Anopheles gambiae str. PEST] >gi|157017962|gb|EAA07885.4| AGAP002757-PA [Anopheles gambiae str. PEST]
Unigene10592_All	517	2.1873	1.2103	--	--
Unigene10593_All	389	9.6902	1.9302	--	--
Unigene10594_All	488	0.2575	0	8e-21	similar to neurotransmitter transporter [Nasonia vitripennis]
Unigene10595_All	1104	2.2763	1.1335	3e-46	5-methylthioadenosine phosphorylase-like [Saccoglossus kowalevskii]
Unigene10596_All	966	14.1779	0	8e-27	hatching enzyme [Clupea pallasii]
Unigene10597_All	913	3.303	3.4267	--	--
Unigene10598_All	2026	8.7446	0.9265	1e-37	similar to vacuolar protein sorting-associated protein [Tribolium castaneum]
Unigene10599_All	555	2.9431	0.2255	2e-24	GI13760 [Drosophila mojavensis] >gi|193920535|gb|EDW19402.1| GI13760 [Drosophila mojavensis]
Unigene1059_All	2051	4.5334	17.2065	--	--
Unigene105_All	778	247.746	537.25	1e-102	similar to ENSANGP00000005081 [Nasonia vitripennis]
Unigene10600_All	1128	0.4456	0.7766	1e-73	glutaminyl-trna synthetase [Aedes aegypti] >gi|108872298|gb|EAT36523.1| glutaminyl-trna synthetase [Aedes aegypti]
Unigene10601_All	391	1.9281	2.5605	3e-64	ADP-ribosylation factor 6 [Harpegnathos saltator]
Unigene10602_All	561	0.4479	0.2231	--	--
Unigene10603_All	496	2.2799	1.7661	1e-08	Ubiquitin carboxyl-terminal hydrolase 16 [Camponotus floridanus]
Unigene10604_All	576	2.3996	1.0863	2e-14	uncharacterized conserved protein [Glossina morsitans morsitans]
Unigene10605_All	553	0.2272	0	8e-20	AGAP011192-PA [Anopheles gambiae str. PEST] >gi|157019644|gb|EAA05242.4| AGAP011192-PA [Anopheles gambiae str. PEST]
Unigene10606_All	613	0.41	0	6e-28	C. elegans protein Y76A2B.5, confirmed by transcript evidence [Caenorhabditis elegans]
Unigene10607_All	508	3.4628	0.9854	--	--
Unigene10608_All	530	4.9786	4.7224	--	--
Unigene10609_All	514	3.4224	0.7304	--	--
Unigene1060_All	600	6.0731	33.9974	--	--
Unigene10610_All	1332	9.3388	0.5637	2e-46	GK11736 [Drosophila willistoni] >gi|194165922|gb|EDW80823.1| GK11736 [Drosophila willistoni]
Unigene10611_All	1150	0.5463	0.8706	4e-08	lysosomal trafficking regulator-like [Oryctolagus cuniculus]
Unigene10612_All	498	3.0277	1.5078	--	--
Unigene10613_All	551	3.1926	0.4542	2e-15	protein phosphatase 1H [Salmo salar] >gi|209155078|gb|ACI33771.1| phosphatase 1H [Salmo salar]
Unigene10614_All	399	6.6131	3.4501	4e-07	similar to gpi inositol deacylase pgap1 [Tribolium castaneum]
Unigene10615_All	816	2.7717	0.9202	--	--
Unigene10616_All	611	0.4113	0	2e-19	integrator complex subunit 12-like, partial [Saccoglossus kowalevskii]
Unigene10617_All	1088	2.0788	5.521	7e-10	similar to CG11141 CG11141-PB [Tribolium castaneum]
Unigene10618_All	1164	4.3179	6.4507	--	--
Unigene10619_All	581	3.8928	1.2924	--	--
Unigene1061_All	460	7.6482	22.5803	--	--
Unigene10620_All	634	1.1891	2.3687	5e-15	GH15103 [Drosophila grimshawi] >gi|193897757|gb|EDV96623.1| GH15103 [Drosophila grimshawi]
Unigene10621_All	542	1.6228	2.3089	--	--
Unigene10622_All	476	4.4875	1.3145	2e-22	GA25322 [Drosophila pseudoobscura pseudoobscura] >gi|198137477|gb|EDY69626.1| GA25322 [Drosophila pseudoobscura pseudoobscura]
Unigene10623_All	1085	3.8216	2.7682	1e-108	Si:dkey-91i17.1 protein [Danio rerio]
Unigene10624_All	526	2.8665	9.2787	--	--
Unigene10625_All	1618	17.9389	6.0329	1e-90	Thrombospondin type-1 domain-containing protein 4 [Harpegnathos saltator]
Unigene10626_All	552	0	0	6e-28	similar to Ubiquitin domain-containing protein UBFD1 [Tribolium castaneum]
Unigene10627_All	1460	6.5407	1.2857	9e-13	basic proline-rich protein [Sus scrofa] >gi|15145793|gb|AAK61381.1| basic proline-rich protein [Sus scrofa]
Unigene10628_All	1348	2.3303	0.6499	7e-53	Vacuolar proton translocating ATPase 116 kDa subunit a isoform 1 [Camponotus floridanus]
Unigene10629_All	564	3.5645	1.7751	6e-20	Armadillo repeat-containing protein 7 [Camponotus floridanus]
Unigene1062_All	453	5.8248	9.9452	--	--
Unigene10630_All	1527	3.456	2.8684	1e-156	structural maintenance of chromosomes 1A [Nasonia vitripennis]
Unigene10631_All	2347	6.1567	6.5585	1e-160	similar to transglutaminase [Tribolium castaneum]
Unigene10632_All	609	3.5075	0	--	--
Unigene10633_All	1372	15.9352	3.2837	--	--
Unigene10634_All	582	0.4318	0	1e-17	NMDA receptor regulated 1-like [Saccoglossus kowalevskii]
Unigene10635_All	547	2.0674	0.4576	6e-07	receptor for egg jelly protein [Strongylocentrotus purpuratus] >gi|124289154|gb|ABM98427.1| receptor for egg jelly protein 9 [Strongylocentrotus purpuratus]
Unigene10636_All	551	0	0	--	--
Unigene10637_All	571	3.7409	3.2875	3e-21	GD20321 [Drosophila simulans] >gi|194199184|gb|EDX12760.1| GD20321 [Drosophila simulans]
Unigene10638_All	1495	0.5043	0.1674	2e-97	TIA-1-like protein [Scylla paramamosain]
Unigene10639_All	504	1.4958	0	5e-17	Chymotrypsin-1 [Harpegnathos saltator]
Unigene1063_All	1094	6.2021	18.0738	1e-120	GJ22766 [Drosophila virilis] >gi|194152598|gb|EDW68032.1| GJ22766 [Drosophila virilis]
Unigene10640_All	497	0	0	5e-13	AGAP012096-PA [Anopheles gambiae str. PEST] >gi|157013208|gb|EAA00318.3| AGAP012096-PA [Anopheles gambiae str. PEST]
Unigene10641_All	515	0	0	6e-15	Transmembrane and coiled-coil domains protein 1 [Harpegnathos saltator]
Unigene10642_All	528	3.8076	0	5e-08	flotillin 1 [Schistosoma japonicum] >gi|226487910|emb|CAX75620.1| flotillin 1 [Schistosoma japonicum] >gi|226487912|emb|CAX75621.1| flotillin 1 [Schistosoma japonicum] >gi|226487914|emb|CAX75622.1| flotillin 1 [Schistosoma japonicum] >gi|226487916|emb|CAX75623.1| flotillin 1 [Schistosoma japonicum]
Unigene10643_All	670	3.1881	0	3e-09	Cytokine receptor [Harpegnathos saltator]
Unigene10644_All	616	4.0795	1.6252	--	--
Unigene10645_All	597	3.3675	21.3813	--	--
Unigene10646_All	559	0	0	3e-13	exportin-5 [Apis mellifera]
Unigene10647_All	1079	1.6303	1.0438	1e-113	GK10232 [Drosophila willistoni] >gi|194167966|gb|EDW82867.1| GK10232 [Drosophila willistoni]
Unigene10648_All	551	6.6131	0	6e-18	Unknown (protein for IMAGE:7925381) [Danio rerio]
Unigene10649_All	1543	3.5016	2.9198	2e-10	GH12898 [Drosophila grimshawi] >gi|193901620|gb|EDW00487.1| GH12898 [Drosophila grimshawi]
Unigene1064_All	1014	5.9479	77.135	3e-34	Uncharacterized protein KIAA1267 [Harpegnathos saltator]
Unigene10650_All	898	4.4775	1.2542	3e-15	Brefeldin A-inhibited guanine nucleotide-exchange protein 3 [Camponotus floridanus]
Unigene10651_All	355	5.6631	3.5252	--	--
Unigene10652_All	518	11.8858	1.4495	--	--
Unigene10653_All	638	0.1969	29.6187	--	--
Unigene10654_All	950	1.1904	0.7904	--	--
Unigene10655_All	312	8.8599	5.2143	2e-06	hypothetical protein LOC500855, isoform CRA_b [Rattus norvegicus] >gi|149066512|gb|EDM16385.1| hypothetical protein LOC500855, isoform CRA_b [Rattus norvegicus]
Unigene10656_All	538	5.8387	1.8609	3e-33	calcium-regulated heat stable protein 1 [Acyrthosiphon pisum] >gi|239789112|dbj|BAH71202.1| ACYPI008400 [Acyrthosiphon pisum]
Unigene10657_All	525	4.0687	0.2384	--	--
Unigene10658_All	516	0	0	3e-42	Sodium/hydrogen exchanger 8 [Camponotus floridanus]
Unigene10659_All	2569	8.0701	3.4586	2e-49	Uncharacterized protein KIAA0090 [Camponotus floridanus]
Unigene1065_All	381	102.235	133.027	--	--
Unigene10660_All	954	21.4685	94.8417	3e-28	AGAP008664-PA [Anopheles gambiae str. PEST] >gi|116127809|gb|EAA10132.4| AGAP008664-PA [Anopheles gambiae str. PEST]
Unigene10661_All	572	0.8787	0.4376	--	--
Unigene10662_All	1649	0.762	0.683	--	--
Unigene10663_All	495	0.5077	2.781	--	--
Unigene10664_All	1299	0.0967	0	--	--
Unigene10665_All	594	0	0	--	--
Unigene10666_All	1298	3.9689	0.2892	2e-25	DHHC-types zinc finger transcription factor family member (dhhc-1)-like [Saccoglossus kowalevskii]
Unigene10667_All	970	0.2591	0	5e-37	sumo ligase [Aedes aegypti] >gi|108872204|gb|EAT36429.1| sumo ligase [Aedes aegypti]
Unigene10668_All	547	3.4456	20.1328	8e-12	GE14484 [Drosophila yakuba] >gi|194185748|gb|EDW99359.1| GE14484 [Drosophila yakuba]
Unigene10669_All	1219	1.34	1.5399	1e-73	similar to CG7899-PB [Nasonia vitripennis]
Unigene1066_All	706	12.2802	75.1572	--	--
Unigene10670_All	921	1.0914	0	8e-17	zinc finger protein [Aedes aegypti] >gi|108869464|gb|EAT33689.1| zinc finger protein [Aedes aegypti]
Unigene10671_All	610	0.412	0	9e-18	Sorting nexin-27 [Camponotus floridanus]
Unigene10672_All	531	0	0	4e-07	uncharacterized protein C9orf72-like [Pongo abelii]
Unigene10673_All	520	0.4833	1.444	--	--
Unigene10674_All	942	0.1334	0	--	--
Unigene10675_All	502	8.2598	37.8921	2e-14	GF17078 [Drosophila ananassae] >gi|190626780|gb|EDV42304.1| GF17078 [Drosophila ananassae]
Unigene10676_All	1559	0.0806	1.2041	1e-119	similar to phosphoglycerate kinase [Nasonia vitripennis]
Unigene10677_All	1032	0.3653	2.0615	--	--
Unigene10678_All	541	1.3935	1.1566	2e-13	Leucine-rich repeat-containing protein 68 [Camponotus floridanus]
Unigene10679_All	386	9.44	4.2147	6e-46	similar to Elongation factor Tu GTP-binding domain-containing protein 1 [Hydra magnipapillata]
Unigene1067_All	770	12.565	24.8662	--	--
Unigene10680_All	957	2.6259	2.7461	2e-64	CG8745-like [Saccoglossus kowalevskii]
Unigene10681_All	564	0.2228	0	--	--
Unigene10682_All	519	4.1157	0.2411	--	--
Unigene10683_All	1236	6.8111	3.24	1e-140	rugose, isoform D [Drosophila melanogaster] >gi|220901675|gb|ACL82890.1| rugose, isoform D [Drosophila melanogaster]
Unigene10684_All	582	2.1589	1.0751	--	--
Unigene10685_All	506	3.2282	2.2259	2e-11	Nuclear receptor 2C2-associated protein [Harpegnathos saltator]
Unigene10686_All	1578	0.2389	0	2e-23	similar to huntingtin interacting protein [Nasonia vitripennis]
Unigene10687_All	965	6.1197	1.5562	6e-45	TLC domain-containing protein 2 [Danio rerio] >gi|182701398|sp|A8WGS4.1|TLCD2_DANRE RecName: Full=TLC domain-containing protein 2 >gi|159156007|gb|AAI54829.1| Zgc:175098 protein [Danio rerio]
Unigene10688_All	482	0	0	2e-10	similar to AGAP005020-PA isoform 2 [Tribolium castaneum]
Unigene10689_All	663	5.875	1.6988	9e-28	vacuolar protein sorting-associated protein 53 homolog [Sus scrofa]
Unigene1068_All	833	5.7319	67.6047	1e-10	GI18209 [Drosophila mojavensis] >gi|229891423|sp|B4KID9.1|PESC_DROMO RecName: Full=Pescadillo homolog >gi|193914569|gb|EDW13436.1| GI18209 [Drosophila mojavensis]
Unigene10690_All	525	2.3933	0	--	--
Unigene10691_All	494	0.2544	0	--	--
Unigene10692_All	518	0.4851	0.9664	7e-14	similar to AGAP005226-PA [Tribolium castaneum]
Unigene10693_All	538	3.5032	0.6978	2e-06	similar to Vesicle-associated membrane protein 2 (VAMP-2) (Synaptobrevin 2) [Canis familiaris]
Unigene10694_All	1051	1.1955	0.3572	1e-07	similar to cation-independent mannose-6-phosphate receptor, partial [Ciona intestinalis]
Unigene10695_All	602	0	0	--	--
Unigene10696_All	1422	0.3534	0.352	1e-07	novel protein similar to vertebrate symplekin (SYMPK) [Danio rerio]
Unigene10697_All	557	0	0	--	--
Unigene10698_All	690	1.0926	0.5441	2e-09	similar to CG15744-PA [Nasonia vitripennis]
Unigene10699_All	1027	2.9363	7.7986	--	--
Unigene1069_All	332	11.7324	35.0553	1e-10	AGAP006243-PA [Anopheles gambiae str. PEST] >gi|157016117|gb|EAA11579.4| AGAP006243-PA [Anopheles gambiae str. PEST]
Unigene106_All	826	20.0796	48.4818	--	--
Unigene10700_All	930	0.5404	2.9604	--	--
Unigene10701_All	853	4.1245	2.3474	7e-09	GG19108 [Drosophila erecta] >gi|190649194|gb|EDV46472.1| GG19108 [Drosophila erecta]
Unigene10702_All	498	0	0	--	--
Unigene10703_All	487	8.5143	0.257	--	--
Unigene10704_All	896	10.0969	41.7611	1e-13	similar to leucine zipper protein [Tribolium castaneum]
Unigene10705_All	641	3.5284	0.7809	--	--
Unigene10706_All	1514	5.8094	2.9757	1e-168	protein kinase c zeta and iota isoform [Aedes aegypti] >gi|108881648|gb|EAT45873.1| protein kinase c zeta and iota isoform [Aedes aegypti]
Unigene10707_All	567	0.8864	0	--	--
Unigene10708_All	512	1.227	0	--	--
Unigene10709_All	514	2.2001	1.2174	3e-31	histone H2B [Rhynchosciara americana]
Unigene1070_All	885	6.6729	9.757	5e-40	similar to solute carrier family 25, member 38 [Tribolium castaneum]
Unigene10710_All	1505	4.6753	1.9125	--	--
Unigene10711_All	523	2.6427	11.7247	--	--
Unigene10712_All	1111	0.9048	0.7885	4e-44	similar to MGC83808 protein, partial [Strongylocentrotus purpuratus]
Unigene10713_All	1011	2.7342	2.847	3e-26	kappa B-ras 1 [Oryctolagus cuniculus]
Unigene10714_All	1687	3.9475	2.7447	1e-115	Pyruvate dehydrogenase E1 component subunit beta, mitochondrial [Camponotus floridanus]
Unigene10715_All	542	2.5501	1.8471	--	--
Unigene10716_All	551	7.7533	1.817	--	--
Unigene10717_All	1031	5.8498	0.3641	1e-30	Olfactomedin-like protein 2A [Camponotus floridanus]
Unigene10718_All	835	8.8782	26.5275	8e-42	Transcription initiation factor TFIID subunit 9 [Harpegnathos saltator]
Unigene10719_All	556	0.452	1.3505	--	--
Unigene1071_All	232	27.0797	15.643	--	--
Unigene10720_All	360	7.3296	2.4334	--	--
Unigene10721_All	389	14.8583	0.6434	--	--
Unigene10722_All	607	1.242	2.8863	5e-67	leukotriene A-4 hydrolase [Gallus gallus]
Unigene10723_All	678	0	0.5537	1e-27	Uncharacterized protein C19orf29 [Harpegnathos saltator]
Unigene10724_All	859	4.3882	1.6025	7e-35	prophenoloxdiase [Eriocheir sinensis]
Unigene10725_All	548	5.5029	3.6538	2e-37	transcription initiation factor IIA (TFIIA), gamma chain [Aedes aegypti] >gi|108882476|gb|EAT46701.1| transcription initiation factor IIA (TFIIA), gamma chain [Aedes aegypti]
Unigene10726_All	1560	8.2961	12.2737	1e-100	AGAP005160-PA [Anopheles gambiae str. PEST] >gi|158292678|ref|XP_001688512.1| AGAP005160-PB [Anopheles gambiae str. PEST] >gi|157017103|gb|EDO64093.1| AGAP005160-PA [Anopheles gambiae str. PEST] >gi|157017105|gb|EDO64095.1| AGAP005160-PB [Anopheles gambiae str. PEST]
Unigene10727_All	522	0	0	3e-31	cell division protein kinase 8-like [Sus scrofa]
Unigene10728_All	543	2.7768	2.9961	6e-52	AGAP009094-PA [Anopheles gambiae str. PEST] >gi|116117683|gb|EAA14741.3| AGAP009094-PA [Anopheles gambiae str. PEST]
Unigene10729_All	1579	9.4695	0.5548	5e-06	similar to nucleoporin 98kDa [Hydra magnipapillata]
Unigene1072_All	480	76.1752	113.933	6e-06	RecName: Full=Uncharacterized protein DKFZp434B061
Unigene10730_All	591	0.4252	0	3e-17	Uncharacterized protein KIAA1109 [Harpegnathos saltator]
Unigene10731_All	496	0.76	0	--	--
Unigene10732_All	1107	3.0646	1.2435	2e-78	similar to neurofibromin [Nasonia vitripennis]
Unigene10733_All	1051	2.5106	0.7144	3e-31	GK17827 [Drosophila willistoni] >gi|194164901|gb|EDW79802.1| GK17827 [Drosophila willistoni]
Unigene10734_All	1748	0	0.0716	1e-146	lysyl-tRNA synthetase [Aedes aegypti] >gi|108868817|gb|EAT33042.1| lysyl-tRNA synthetase [Aedes aegypti]
Unigene10735_All	526	1.6721	0.4758	1e-22	phosphoglucomutase 1-like [Saccoglossus kowalevskii]
Unigene10736_All	565	0.6672	6.8663	--	--
Unigene10737_All	471	3.2013	1.8599	--	--
Unigene10738_All	507	0.7435	0	--	--
Unigene10739_All	527	0	0.2375	--	--
Unigene1073_All	1867	3.9034	25.7393	--	--
Unigene10740_All	623	1.6135	6.0262	7e-34	NudE-like protein 1a [Danio rerio]
Unigene10741_All	1628	12.1945	0	4e-13	similar to SI:dZ173M20.16 (novel transposase), partial [Strongylocentrotus purpuratus] >gi|115657371|ref|XP_785127.2| similar to SI:dZ173M20.16 (novel transposase), partial [Strongylocentrotus purpuratus]
Unigene10742_All	2018	5.417	2.6046	4e-90	GA11483 [Drosophila pseudoobscura pseudoobscura] >gi|54635970|gb|EAL25373.1| GA11483 [Drosophila pseudoobscura pseudoobscura]
Unigene10743_All	510	1.4782	0.2454	1e-15	Protein Disulfide Isomerase family member (pdi-2)-like, partial [Saccoglossus kowalevskii]
Unigene10744_All	539	2.3312	4.4114	--	--
Unigene10745_All	508	2.9681	0.4927	--	--
Unigene10746_All	622	0	0	3e-16	reverse transcriptase [Penaeus monodon]
Unigene10747_All	676	6.8773	0.9256	2e-24	similar to Discoidin domain receptor CG33531-PA [Tribolium castaneum]
Unigene10748_All	511	4.1801	2.2041	--	--
Unigene10749_All	723	0	0	2e-40	GK25759 [Drosophila willistoni] >gi|194167456|gb|EDW82357.1| GK25759 [Drosophila willistoni]
Unigene1074_All	646	6.2241	78.457	2e-08	hypothetical protein TRIADDRAFT_53787 [Trichoplax adhaerens] >gi|190587723|gb|EDV27765.1| hypothetical protein TRIADDRAFT_53787 [Trichoplax adhaerens]
Unigene10750_All	597	0	5.8694	7e-44	AMP deaminase [Nicoletia meinerti]
Unigene10751_All	525	0.4787	0.2384	--	--
Unigene10752_All	666	3.0186	0	--	--
Unigene10753_All	543	0.2314	2.7656	4e-30	RecName: Full=Cytosolic Fe-S cluster assembly factor nubp1; AltName: Full=Nucleotide-binding protein 1; Short=NBP 1
Unigene10754_All	636	0.1976	0	7e-65	5-methyltetrahydrofolate-homocysteine methyltransferase-like [Saccoglossus kowalevskii]
Unigene10755_All	545	6.9165	22.2733	--	--
Unigene10756_All	500	0	0.2503	4e-15	zinc finger and SCAN domain-containing protein 5C-like [Macaca mulatta]
Unigene10757_All	510	6.8984	0.7361	1e-13	neuroblastoma-amplified protein [Taeniopygia guttata]
Unigene10758_All	633	1.7865	0.3954	2e-09	adenosine deaminase [Takifugu rubripes]
Unigene10759_All	494	2.2892	3.0399	--	--
Unigene1075_All	885	5.1112	4.8078	--	--
Unigene10760_All	524	2.3979	0.4776	--	--
Unigene10761_All	497	1.5169	0.5036	4e-15	similar to Kinesin-like protein KIF21A (Kinesin-like protein KIF2) (Renal carcinoma antigen NY-REN-62) [Equus caballus]
Unigene10762_All	527	3.8148	0.2375	3e-30	galactosyltransferase [Loa loa] >gi|307759171|gb|EFO18405.1| galactosyltransferase [Loa loa]
Unigene10763_All	499	0.5036	0	--	--
Unigene10764_All	1021	0.4923	2.3288	9e-59	similar to Brix domain-containing protein 2 (Ribosome biogenesis protein Brix) [Ciona intestinalis]
Unigene10765_All	836	0	0	2e-43	protein OS-9 [Xenopus (Silurana) tropicalis]
Unigene10766_All	1313	4.402	1.1437	2e-09	CRE-PQN-75 protein [Caenorhabditis remanei] >gi|308243266|gb|EFO87218.1| CRE-PQN-75 protein [Caenorhabditis remanei]
Unigene10767_All	840	0.5983	0.149	1e-40	similar to Small nuclear ribonucleoprotein Sm D1 [Hydra magnipapillata]
Unigene10768_All	551	0	0	--	--
Unigene10769_All	1280	4.7119	1.6621	--	--
Unigene1076_All	1865	6.5351	15.0307	1e-180	Leukotriene A-4 hydrolase [Salmo salar] >gi|209154604|gb|ACI33534.1| Leukotriene A-4 hydrolase [Salmo salar]
Unigene10770_All	514	9.7782	0.9739	8e-28	similar to blue cheese CG14001-PA [Tribolium castaneum]
Unigene10771_All	515	0	0	4e-24	mixed-lineage leukemia protein [Culex quinquefasciatus] >gi|167871728|gb|EDS35111.1| mixed-lineage leukemia protein [Culex quinquefasciatus]
Unigene10772_All	515	5.8555	4.86	--	--
Unigene10773_All	589	5.3332	2.7621	9e-07	TBC1 domain family member 16 [Harpegnathos saltator]
Unigene10774_All	680	2.5869	3.8647	--	--
Unigene10775_All	557	5.1884	0.674	--	--
Unigene10776_All	532	0	0	1e-07	Protein furry [Harpegnathos saltator]
Unigene10777_All	552	0.2276	0	2e-36	similar to rab [Tribolium castaneum]
Unigene10778_All	1335	0.0941	0	2e-11	similar to mini-me CG3231-PA [Tribolium castaneum]
Unigene10779_All	583	1.5087	0.2147	--	--
Unigene1077_All	1240	7.1945	14.8356	1e-111	cell division protein kinase 17-like [Ailuropoda melanoleuca]
Unigene10780_All	939	1.3381	0.1333	5e-16	similar to Chromosome 18 open reading frame 8 [Gallus gallus]
Unigene10781_All	678	0.1853	0	6e-06	proteophosphoglycan ppg4 [Leishmania braziliensis MHOM/BR/75/M2904] >gi|134065504|emb|CAM43271.1| proteophosphoglycan ppg4 [Leishmania braziliensis MHOM/BR/75/M2904]
Unigene10782_All	561	6.7192	10.4844	7e-06	hypothetical protein IscW_ISCW024522 [Ixodes scapularis] >gi|215502011|gb|EEC11505.1| hypothetical protein IscW_ISCW024522 [Ixodes scapularis]
Unigene10783_All	518	6.5493	1.208	8e-23	Acetyl-CoA carboxylase [Camponotus floridanus]
Unigene10784_All	1451	6.9276	1.3799	1e-142	Large neutral amino acids transporter small subunit 2 [Harpegnathos saltator]
Unigene10785_All	1529	0.5752	1.5551	--	--
Unigene10786_All	532	6.6131	3.5285	2e-23	aprataxin-like [Apis mellifera]
Unigene10787_All	1423	0.7064	1.3192	--	--
Unigene10788_All	529	3.3253	0.4731	--	--
Unigene10789_All	522	4.5735	3.5961	--	--
Unigene1078_All	715	3.8661	8.9263	1e-40	ACYPI008275 [Acyrthosiphon pisum]
Unigene10790_All	1821	1.863	1.4432	--	--
Unigene10791_All	566	1.11	4.422	--	--
Unigene10792_All	546	2.7615	0.6876	2e-16	Protein dopey-1-like protein [Harpegnathos saltator]
Unigene10793_All	474	26.5084	0.792	--	--
Unigene10794_All	908	6.3655	3.0321	8e-35	Tuberin [Camponotus floridanus]
Unigene10795_All	657	6.3112	0.5714	2e-46	high affinity cationic amino acid transporter 1-like [Acyrthosiphon pisum]
Unigene10796_All	1281	4.7082	1.4654	7e-43	similar to fibrillin 2 precursor [Strongylocentrotus purpuratus]
Unigene10797_All	485	6.9949	1.8062	--	--
Unigene10798_All	3026	7.3912	1.861	3e-58	similar to AGAP005275-PA [Tribolium castaneum]
Unigene10799_All	559	0.2248	0	--	--
Unigene1079_All	614	6.5485	35.0566	--	--
Unigene107_All	777	58.863	23.1927	2e-72	ETHE1 protein, mitochondrial precursor [Caligus clemensi]
Unigene10800_All	495	1.2692	0	1e-25	similar to ENSANGP00000009625 [Nasonia vitripennis]
Unigene10801_All	515	3.4157	0.486	4e-13	retinaldehyde binding protein 1-like [Saccoglossus kowalevskii]
Unigene10802_All	517	0.9721	7.0197	4e-24	GF17090 [Drosophila ananassae] >gi|190626753|gb|EDV42277.1| GF17090 [Drosophila ananassae]
Unigene10803_All	548	0	0.2284	--	--
Unigene10804_All	508	0.2473	0.2463	--	--
Unigene10805_All	841	3.8845	2.2321	1e-06	transport and Golgi organization protein 11 [Apis mellifera]
Unigene10806_All	625	8.0416	13.8159	--	--
Unigene10807_All	2276	6.5144	3.519	1e-107	similar to mFLJ00229 protein [Strongylocentrotus purpuratus] >gi|115951225|ref|XP_001179638.1| similar to mFLJ00229 protein [Strongylocentrotus purpuratus]
Unigene10808_All	515	0	0	--	--
Unigene10809_All	628	0	0	--	--
Unigene1080_All	1301	6.8571	24.4324	--	--
Unigene10810_All	3255	4.169	4.7289	6e-81	atlastin-1 [Danio rerio] >gi|220678990|emb|CAX14695.1| novel protein similar to H.sapiens SPG3A, spastic paraplegia 3A (autosomal dominant) (SPG3A) [Danio rerio]
Unigene10811_All	1633	2.1544	0.6131	8e-17	similar to oxidase/peroxidase [Tribolium castaneum]
Unigene10812_All	1642	2.9844	1.6767	3e-61	WD40 repeat-containing protein SMU1 [Gallus gallus] >gi|82233961|sp|Q5ZME8.1|SMU1_CHICK RecName: Full=WD40 repeat-containing protein SMU1; AltName: Full=Smu-1 suppressor of mec-8 and unc-52 protein homolog
Unigene10813_All	542	7.8821	3.4634	--	--
Unigene10814_All	536	0.2344	0	--	--
Unigene10815_All	545	2.9972	3.9036	--	--
Unigene10816_All	918	3.285	0.9543	4e-57	Membrane-associated guanylate kinase, WW and PDZ domain-containing protein 2 [Harpegnathos saltator]
Unigene10817_All	929	1.4878	4.5801	5e-16	e3 ubiquitin-protein ligase UBR1-like [Acyrthosiphon pisum]
Unigene10818_All	385	4.2427	1.6252	8e-60	projectin [Procambarus clarkii]
Unigene10819_All	2288	3.5696	1.258	1e-126	SPRY domain-containing SOCS box protein 1 [Harpegnathos saltator]
Unigene1081_All	680	18.2931	8.4656	4e-07	hypothetical protein EAI_06176 [Harpegnathos saltator]
Unigene10820_All	780	10.793	2.5671	4e-08	GA28568 [Drosophila pseudoobscura pseudoobscura] >gi|198151215|gb|EDY74106.1| GA28568 [Drosophila pseudoobscura pseudoobscura]
Unigene10821_All	507	2.7261	1.481	2e-19	hCG1793893 [Homo sapiens]
Unigene10822_All	551	0	0	4e-13	Regulator of nonsense transcripts 1 [Harpegnathos saltator]
Unigene10823_All	568	0.2212	0	2e-55	similar to spliceosome associated protein [Tribolium castaneum]
Unigene10824_All	537	1.4039	0	3e-15	similar to KIAA1018 protein [Taeniopygia guttata]
Unigene10825_All	526	1.6721	0.9517	--	--
Unigene10826_All	551	5.4729	0.2271	1e-17	similar to Glypican-5 precursor [Canis familiaris]
Unigene10827_All	658	0	0	--	--
Unigene10828_All	1412	0.267	0	1e-102	Histone demethylase JARID1A [Harpegnathos saltator]
Unigene10829_All	1433	3.2443	2.2706	2e-64	outspread, isoform E [Drosophila melanogaster] >gi|272407043|gb|AAN10878.3| outspread, isoform E [Drosophila melanogaster]
Unigene1082_All	1477	32.9225	68.291	6e-08	Hypothetical protein CBG21638 [Caenorhabditis briggsae]
Unigene10830_All	624	5.6381	0.6017	--	--
Unigene10831_All	560	0	0	1e-29	similar to CG32473-PA [Nasonia vitripennis]
Unigene10832_All	1301	0	0	4e-31	transforming acidic coiled-coil containing protein 1/2 [Schistosoma mansoni]
Unigene10833_All	501	0	0.2498	9e-24	GD11803 [Drosophila simulans] >gi|194194871|gb|EDX08447.1| GD11803 [Drosophila simulans]
Unigene10834_All	1181	0.4256	0.106	4e-47	mitochondrial UCP5-like protein [Crassostrea virginica]
Unigene10835_All	674	1.4914	0	1e-37	guanylate kinase 1-like isoform 2 [Saccoglossus kowalevskii]
Unigene10836_All	578	0.2174	0.2165	--	--
Unigene10837_All	555	3.6223	1.3529	4e-09	protein dpy-19 homolog 1-like [Ailuropoda melanoleuca]
Unigene10838_All	716	2.9833	1.573	--	--
Unigene10839_All	1369	0.2753	0	6e-75	similar to ubiquitin-activating enzyme E1 [Tribolium castaneum]
Unigene1083_All	1060	12.0908	5.7849	8e-83	Neuronal membrane glycoprotein M6-b [Harpegnathos saltator]
Unigene10840_All	857	2.4925	1.8983	5e-58	myocyte enhancing factor 2 isoform A [Bombyx mori] >gi|68989026|dbj|BAE06225.1| myocyte enhancer factor-2 [Bombyx mori]
Unigene10841_All	630	1.3961	2.3837	--	--
Unigene10842_All	570	3.0861	8.1234	3e-18	zinc finger HIT domain-containing protein 1-like [Apis mellifera]
Unigene10843_All	530	2.6078	1.889	3e-06	alpha-1,6-mannosyltransferase ALG12 [Taeniopygia guttata]
Unigene10844_All	518	0.9703	0.9664	--	--
Unigene10845_All	652	0.3854	0	--	--
Unigene10846_All	487	0	0	3e-26	protein tyrosine phosphatase-like (proline instead of catalytic arginine), member b [Xenopus (Silurana) tropicalis]
Unigene10847_All	572	0	0	--	--
Unigene10848_All	2043	2.4601	1.3476	0	calpain T [Gecarcinus lateralis]
Unigene10849_All	529	0.2375	0	--	--
Unigene1084_All	606	7.4643	93.135	--	--
Unigene10850_All	676	6.1338	3.7025	--	--
Unigene10851_All	904	6.5327	2.6302	1e-49	protein prune homolog 2 [Xenopus (Silurana) tropicalis] >gi|123911519|sp|Q0IHU9.1|PRUN2_XENTR RecName: Full=Protein prune homolog 2; AltName: Full=BNIP2 motif-containing molecule at the C-terminal region 1
Unigene10852_All	904	4.8648	2.7687	--	--
Unigene10853_All	860	13.8799	3.7834	--	--
Unigene10854_All	519	0.7263	6.2692	1e-33	matrix metalloproteinase 1 isoform 2 [Bombyx mori] >gi|169730454|gb|ACA64805.1| matrix metalloproteinase variant 2 [Bombyx mori]
Unigene10855_All	526	2.8665	3.0929	7e-44	similar to metal response element-binding transcription factor-1 [Nasonia vitripennis]
Unigene10856_All	525	2.6327	0.9535	1e-06	UHRF1-binding protein 1-like [Harpegnathos saltator]
Unigene10857_All	1535	4.9932	1.3044	4e-58	similar to GA17603-PA [Tribolium castaneum]
Unigene10858_All	608	3.5132	1.4408	1e-16	hypothetical protein, partial [Strongylocentrotus purpuratus] >gi|115934135|ref|XP_001179806.1| hypothetical protein, partial [Strongylocentrotus purpuratus]
Unigene10859_All	538	0	0	--	--
Unigene1085_All	969	2.4637	25.0546	--	--
Unigene10860_All	536	0	0	1e-24	Serine/threonine-protein kinase Genghis Khan [Harpegnathos saltator]
Unigene10861_All	555	1.8112	1.3529	--	--
Unigene10862_All	535	9.8641	0.4678	--	--
Unigene10863_All	703	7.5068	3.3823	1e-55	short stop, isoform B [Drosophila melanogaster] >gi|21627201|gb|AAG22268.2| short stop, isoform B [Drosophila melanogaster]
Unigene10864_All	1882	3.0044	9.9743	7e-06	T. brucei spp.-specific protein [Trypanosoma brucei gambiense DAL972]
Unigene10865_All	568	3.7606	6.3894	--	--
Unigene10866_All	489	3.5973	1.0237	--	--
Unigene10867_All	502	0	0	2e-19	surfeit 5 [Bombyx mori] >gi|95102660|gb|ABF51268.1| surfeit 5 [Bombyx mori]
Unigene10868_All	493	4.8425	0	5e-31	RecName: Full=Cytochrome b6-f complex iron-sulfur subunit, chloroplastic; AltName: Full=Plastohydroquinone:plastocyanin oxidoreductase iron-sulfur protein; AltName: Full=Rieske iron-sulfur protein; Short=ISP; Short=RISP; Flags: Precursor >gi|32307530|gb|AAP79170.1| Fe-S subunit of cytochrome c6f complex [Bigelowiella natans]
Unigene10869_All	878	4.8657	2.9932	--	--
Unigene1086_All	1170	3.7588	11.4448	--	--
Unigene10870_All	543	0.9256	0	--	--
Unigene10871_All	1055	1.0719	0.8303	1e-08	similar to Enabled homolog (Drosophila) [Strongylocentrotus purpuratus] >gi|115945717|ref|XP_001180726.1| similar to Enabled homolog (Drosophila) [Strongylocentrotus purpuratus]
Unigene10872_All	542	4.1729	0.2309	--	--
Unigene10873_All	653	0.3848	1.3415	4e-39	Ras opposite [Tribolium castaneum]
Unigene10874_All	512	1.4725	1.2221	--	--
Unigene10875_All	662	1.5184	1.1342	--	--
Unigene10876_All	729	0.6894	2.9183	3e-22	l-seryl-tRNA(Sec) kinase-like [Ailuropoda melanoleuca]
Unigene10877_All	986	1.9115	1.1423	--	--
Unigene10878_All	932	3.6401	1.7456	3e-96	derlin-2-like [Apis mellifera]
Unigene10879_All	562	0.8943	0	--	--
Unigene1087_All	576	5.8898	8.4733	6e-13	AGAP011901-PA [Anopheles gambiae str. PEST] >gi|157013331|gb|EDO63344.1| AGAP011901-PA [Anopheles gambiae str. PEST]
Unigene10880_All	689	4.7415	0.9082	--	--
Unigene10881_All	530	5.4527	5.1946	--	--
Unigene10882_All	574	1.0945	0	--	--
Unigene10883_All	507	0.4957	0	--	--
Unigene10884_All	575	0.6556	0	--	--
Unigene10885_All	786	0.9592	2.7067	1e-10	AGAP008669-PA [Anopheles gambiae str. PEST] >gi|157016702|gb|EAA10126.4| AGAP008669-PA [Anopheles gambiae str. PEST]
Unigene10886_All	967	0.7796	0	--	--
Unigene10887_All	1148	1.204	2.6162	2e-92	similar to thioredoxin-like protein [Nasonia vitripennis]
Unigene10888_All	1288	1.8535	0.9716	2e-92	RecName: Full=Semaphorin-1A; AltName: Full=Fasciclin IV; AltName: Full=Fasciclin-4; AltName: Full=Semaphorin-I; Short=Sema I; Flags: Precursor >gi|160845|gb|AAA29808.1| fasciclin IV [Schistocerca americana]
Unigene10889_All	554	1.134	0.2259	1e-09	hypothetical protein EAI_11486 [Harpegnathos saltator]
Unigene1088_All	1044	4.9345	13.4254	7e-23	similar to LOC496342 protein [Strongylocentrotus purpuratus] >gi|115946306|ref|XP_001181047.1| similar to LOC496342 protein [Strongylocentrotus purpuratus]
Unigene10890_All	779	2.5807	0	--	--
Unigene10891_All	508	2.9681	0.739	--	--
Unigene10892_All	541	0	0.694	--	--
Unigene10893_All	1420	49.3751	1.6745	2e-15	GI15320 [Drosophila mojavensis] >gi|193907830|gb|EDW06697.1| GI15320 [Drosophila mojavensis]
Unigene10894_All	560	1.1219	2.2347	--	--
Unigene10895_All	507	0	0	--	--
Unigene10896_All	1144	1.2082	5.7977	--	--
Unigene10897_All	527	2.3842	0.7124	4e-13	DNA ligase 3 [Danio rerio] >gi|68533696|gb|AAH98869.1| Zgc:112973 [Danio rerio]
Unigene10898_All	569	2.4291	0	--	--
Unigene10899_All	1169	5.0518	9.2065	1e-103	syntenin [Penaeus monodon]
Unigene1089_All	571	3.5208	14.9033	7e-48	GL17299 [Drosophila persimilis] >gi|194113457|gb|EDW35500.1| GL17299 [Drosophila persimilis]
Unigene108_All	2417	47.5151	14.5492	0	similar to ENSANGP00000007666 [Nasonia vitripennis]
Unigene10900_All	1123	7.6084	0.8915	3e-34	predicted protein [Nematostella vectensis] >gi|156219255|gb|EDO40140.1| predicted protein [Nematostella vectensis]
Unigene10901_All	540	6.2825	1.6222	2e-27	amino acid transporter [Crassostrea gigas]
Unigene10902_All	530	1.1854	0	3e-38	similar to ENSANGP00000016870 [Nasonia vitripennis]
Unigene10903_All	499	3.2734	1.0032	6e-15	Ras-like without CAAX 1-like [Saccoglossus kowalevskii]
Unigene10904_All	1141	0	0	3e-64	AGAP001751-PA [Anopheles gambiae str. PEST] >gi|157012583|gb|EAA01249.5| AGAP001751-PA [Anopheles gambiae str. PEST]
Unigene10905_All	373	7.7478	4.3616	--	--
Unigene10906_All	923	0.1361	0.1356	--	--
Unigene10907_All	1754	3.0804	1.4983	1e-143	AGAP000519-PA [Anopheles gambiae str. PEST] >gi|157018707|gb|EAA06452.4| AGAP000519-PA [Anopheles gambiae str. PEST]
Unigene10908_All	728	0	1.3752	1e-16	viral A-type inclusion protein [Trichomonas vaginalis G3]
Unigene10909_All	477	0	0	--	--
Unigene1090_All	1153	3.9232	22.3587	--	--
Unigene10910_All	543	0	0	--	--
Unigene10911_All	615	0	0	3e-10	heat shock 70 kDa protein 14 [Rattus norvegicus] >gi|81891348|sp|Q6AYB4.1|HSP7E_RAT RecName: Full=Heat shock 70 kDa protein 14 >gi|50925705|gb|AAH79118.1| Heat shock protein 14 [Rattus norvegicus] >gi|149021082|gb|EDL78689.1| heat shock 70kDa protein 14 [Rattus norvegicus]
Unigene10912_All	492	0.7662	0	3e-47	prophenoloxidase-activating factor [Eriocheir sinensis]
Unigene10913_All	3159	5.2105	2.4165	1e-174	autophagy-related protein 9 [Nasonia vitripennis]
Unigene10914_All	1137	1.1051	1.761	3e-74	similar to CG7766-PB [Nasonia vitripennis]
Unigene10915_All	721	7.8422	109.002	--	--
Unigene10916_All	594	7.1921	2.7388	2e-38	tumor necrosis factor receptor-associated factor 6 [Litopenaeus vannamei]
Unigene10917_All	785	3.0412	3.9855	2e-15	beta-galactosides-binding lectin [Canis lupus familiaris]
Unigene10918_All	366	9.2692	0	--	--
Unigene10919_All	536	7.9703	2.3348	5e-13	solute carrier family 25 member 36-like [Acyrthosiphon pisum]
Unigene1091_All	523	16.5771	44.9848	3e-46	AGAP003328-PA [Anopheles gambiae str. PEST] >gi|157016943|gb|EAA09633.4| AGAP003328-PA [Anopheles gambiae str. PEST]
Unigene10920_All	519	0.4842	0.7234	3e-16	Zinc finger CCCH domain-containing protein 12C [Camponotus floridanus]
Unigene10921_All	886	10.9199	35.8764	7e-81	Protein pob [Camponotus floridanus]
Unigene10922_All	970	2.7203	0.9031	4e-29	PAP-associated domain-containing protein 5 [Harpegnathos saltator]
Unigene10923_All	538	0.4671	0.4652	--	--
Unigene10924_All	1390	1.0847	1.5305	6e-07	GE13076 [Drosophila yakuba] >gi|194176472|gb|EDW90083.1| GE13076 [Drosophila yakuba]
Unigene10925_All	1000	3.0156	6.0069	--	--
Unigene10926_All	1680	10.9196	2.7561	1e-147	Adenomatous polyposis coli protein [Harpegnathos saltator]
Unigene10927_All	942	5.4688	2.657	2e-08	similar to DNA polymerase zeta catalytic subunit [Tribolium castaneum]
Unigene10928_All	530	0.7112	0.9445	5e-08	GH21580 [Drosophila grimshawi] >gi|224493096|sp|B4J4Y2.1|KTU_DROGR RecName: Full=Protein kintoun; AltName: Full=PP1-interacting protein 20 >gi|193902821|gb|EDW01688.1| GH21580 [Drosophila grimshawi]
Unigene10929_All	845	3.8661	1.481	5e-25	similar to RHO guanyl-nucleotide exchange factor [Tribolium castaneum]
Unigene1092_All	711	13.6076	15.1369	7e-75	v-type proton ATPase 116 kDa subunit a isoform 1-like isoform 2 [Acyrthosiphon pisum]
Unigene10930_All	2046	2.3951	2.5078	1e-122	similar to ATP-dependent clp protease atp-binding subunit clpx [Nasonia vitripennis]
Unigene10931_All	2077	1.0889	2.2896	1e-92	similar to nuclear export factor CRM1 [Nasonia vitripennis]
Unigene10932_All	1429	5.1878	2.89	2e-98	Protein mothers against dpp [Camponotus floridanus]
Unigene10933_All	755	8.1548	1.8233	4e-64	AGAP000314-PA [Anopheles gambiae str. PEST] >gi|157018847|gb|EAA06238.5| AGAP000314-PA [Anopheles gambiae str. PEST]
Unigene10934_All	648	6.2049	13.3255	1e-12	myomodulin neuropeptides 1-like [Callithrix jacchus]
Unigene10935_All	514	0.9778	1.4608	2e-18	similar to phosphorylase kinase, gamma [Nasonia vitripennis]
Unigene10936_All	560	2.2437	6.0337	--	--
Unigene10937_All	937	2.2797	4.1403	--	--
Unigene10938_All	518	0	0	--	--
Unigene10939_All	708	8.1637	1.5908	2e-30	Putative sodium-coupled neutral amino acid transporter 7 [Camponotus floridanus]
Unigene1093_All	740	5.0939	15.5584	1e-16	cytochrome c oxidase subunit VIb/COX12 [Rhipicephalus sanguineus]
Unigene10940_All	531	5.2058	1.1784	--	--
Unigene10941_All	555	2.7168	1.1274	--	--
Unigene10942_All	510	2.4637	8.0975	--	--
Unigene10943_All	530	3.5561	1.1806	--	--
Unigene10944_All	1898	0.2648	0.3956	5e-85	GJ18983 [Drosophila virilis] >gi|194149609|gb|EDW65300.1| GJ18983 [Drosophila virilis]
Unigene10945_All	534	2.1177	0.4687	--	--
Unigene10946_All	1343	0.9356	0	--	--
Unigene10947_All	520	4.8327	70.0324	--	--
Unigene10948_All	613	2.2547	4.4913	5e-34	similar to ENSANGP00000023755 [Nasonia vitripennis]
Unigene10949_All	2539	1.1382	2.0701	0	similar to DEAD box ATP-dependent RNA helicase [Tribolium castaneum]
Unigene1094_All	2845	5.2556	3.563	1e-96	Transportin-3 [Camponotus floridanus]
Unigene10950_All	510	0	0	--	--
Unigene10951_All	551	0	0	1e-17	Exportin-2 [Camponotus floridanus]
Unigene10952_All	601	0	0.6247	1e-11	similar to Kinesin-73 CG8183-PB [Tribolium castaneum]
Unigene10953_All	891	3.8076	0.4214	--	--
Unigene10954_All	546	4.8327	2.9796	--	--
Unigene10955_All	509	0	0	--	--
Unigene10956_All	529	0.9501	0	--	--
Unigene10957_All	597	0	0	--	--
Unigene10958_All	520	2.658	1.2033	2e-26	similar to AGAP011312-PA [Tribolium castaneum]
Unigene10959_All	590	0.6389	0.4242	7e-31	similar to WD repeat endosomal protein [Nasonia vitripennis]
Unigene1095_All	843	54.5526	15.4389	6e-34	AGAP005170-PA [Anopheles gambiae str. PEST] >gi|157017117|gb|EAA09429.4| AGAP005170-PA [Anopheles gambiae str. PEST]
Unigene10960_All	529	1.4251	0.2366	--	--
Unigene10961_All	615	6.7422	70.8131	2e-10	Histidine-rich glycoprotein precursor [Brugia malayi]
Unigene10962_All	668	1.881	0.7494	--	--
Unigene10963_All	576	0.4363	0	--	--
Unigene10964_All	748	1.3438	0.3346	1e-25	RecName: Full=Protein arginine N-methyltransferase 6; AltName: Full=Histone-arginine N-methyltransferase PRMT6
Unigene10965_All	586	0.8577	0.4271	6e-30	similar to AGAP003484-PA [Tribolium castaneum]
Unigene10966_All	1285	2.6401	3.8955	1e-08	Protein lava lamp [Harpegnathos saltator]
Unigene10967_All	501	5.5176	17.2354	3e-08	similar to AGAP009788-PA [Tribolium castaneum]
Unigene10968_All	635	0.5936	1.7737	3e-13	similar to wd-repeat protein [Nasonia vitripennis]
Unigene10969_All	543	0.6942	0.6914	--	--
Unigene1096_All	592	9.9756	42.4897	--	--
Unigene10970_All	533	0.4715	0	6e-41	ubiquitin-conjugating enzyme m [Culex quinquefasciatus] >gi|167866160|gb|EDS29543.1| ubiquitin-conjugating enzyme m [Culex quinquefasciatus]
Unigene10971_All	553	4.0899	0	--	--
Unigene10972_All	878	10.7332	3.4208	1e-66	E3 ubiquitin-protein ligase HUWE1 [Camponotus floridanus]
Unigene10973_All	543	0.2314	0	--	--
Unigene10974_All	513	0	0	--	--
Unigene10975_All	743	10.654	2.8633	--	--
Unigene10976_All	499	5.5397	2.7587	--	--
Unigene10977_All	991	2.6626	2.0205	1e-26	similar to exportin 7 [Tribolium castaneum]
Unigene10978_All	814	1.3892	0.3075	4e-52	GD16401 [Drosophila simulans] >gi|194203303|gb|EDX16879.1| GD16401 [Drosophila simulans]
Unigene10979_All	511	4.1801	1.4694	--	--
Unigene1097_All	748	12.2626	20.9131	2e-11	pol-like protein [Biomphalaria glabrata]
Unigene10980_All	681	4.6127	2.2052	3e-58	AGAP008086-PA [Anopheles gambiae str. PEST] >gi|157015024|gb|EAA12324.3| AGAP008086-PA [Anopheles gambiae str. PEST]
Unigene10981_All	469	0.2679	0	--	--
Unigene10982_All	1256	3.4013	1.6938	3e-42	hypothetical protein [Tribolium castaneum] >gi|270009440|gb|EFA05888.1| hypothetical protein TcasGA2_TC008700 [Tribolium castaneum]
Unigene10983_All	485	0	0	7e-53	hect (homologous to the E6-AP (UBE3A) carboxyl terminus) domain and RCC1 (CHC1)-like domain (RLD) 2, isoform CRA_a [Mus musculus]
Unigene10984_All	890	0.5647	0.1406	--	--
Unigene10985_All	586	1.5009	0	1e-12	similar to tripeptidylpeptidase II [Nasonia vitripennis]
Unigene10986_All	524	2.8775	7.1647	--	--
Unigene10987_All	499	0.2518	0.2508	--	--
Unigene10988_All	576	0.8726	0.4345	4e-26	phosphoglucomutase 2-like 1-like [Oryctolagus cuniculus]
Unigene10989_All	522	2.4071	0.4795	1e-15	Zinc finger protein 609 [Harpegnathos saltator]
Unigene1098_All	595	9.0806	104.111	2e-39	ribonuclease UK114-like [Sus scrofa]
Unigene10990_All	514	0	0	--	--
Unigene10991_All	524	0.7194	1.1941	3e-13	similar to ENSANGP00000012211 [Nasonia vitripennis]
Unigene10992_All	679	0.1851	0.1843	2e-16	E3 SUMO-protein ligase RanBP2 [Harpegnathos saltator]
Unigene10993_All	605	0	0	--	--
Unigene10994_All	701	12.0093	1.6067	--	--
Unigene10995_All	1399	8.8018	0.4473	3e-76	similar to acyl-CoA synthetase short-chain family member 1 [Ciona intestinalis]
Unigene10996_All	831	1.3608	4.2166	--	--
Unigene10997_All	542	4.8683	2.078	--	--
Unigene10998_All	635	1.3851	0.9854	1e-08	conserved hypothetical protein [Ixodes scapularis] >gi|215507512|gb|EEC17004.1| conserved hypothetical protein [Ixodes scapularis]
Unigene10999_All	484	0	0	1e-17	drebrin-like protein-like [Acyrthosiphon pisum]
Unigene1099_All	877	5.1578	6.8494	--	--
Unigene109_All	3346	13.0306	21.6552	1e-113	extended synaptotagmin-like protein 2a [Tribolium castaneum]
Unigene10_All	2889	18.2234	49.8582	0	rap guanine nucleotide exchange factor 2-like [Acyrthosiphon pisum]
Unigene11000_All	1260	11.0691	3.8735	--	--
Unigene11001_All	547	0.4594	0	--	--
Unigene11002_All	952	1.4518	18.1406	1e-09	T-cell receptor beta chain ANA 11 [Brugia malayi]
Unigene11003_All	599	2.5172	1.2535	9e-31	NAD-dependent deacetylase sirtuin-1 [Camponotus floridanus]
Unigene11004_All	550	0	0.4551	--	--
Unigene11005_All	504	3.4903	1.9864	--	--
Unigene11006_All	2353	4.539	4.0952	6e-75	fructose 1,6-bisphosphate aldolase [Bombyx mori] >gi|95103026|gb|ABF51454.1| fructose 1,6-bisphosphate aldolase [Bombyx mori]
Unigene11007_All	581	3.8928	0.8616	--	--
Unigene11008_All	525	0.2393	0	5e-12	similar to Presequence protease, mitochondrial precursor (hPreP) (Pitrilysin metalloproteinase 1) (Metalloprotease 1) (hMP1) [Equus caballus]
Unigene11009_All	948	2.7834	1.0561	5e-36	protein phosphatase 1H-like [Ailuropoda melanoleuca]
Unigene1100_All	201	5.001	3.7356	6e-06	cytochrome P450 3A1 [Mytilus edulis]
Unigene11010_All	553	2.9538	0.4526	5e-28	serine hydroxymethyltransferase, mitochondrial-like [Sus scrofa]
Unigene11011_All	549	2.2887	3.8751	1e-21	program cell death 5-like [Penaeus monodon]
Unigene11012_All	825	13.098	0.9101	--	--
Unigene11013_All	612	0	0	3e-12	Serine/threonine-protein kinase TBK1 [Harpegnathos saltator]
Unigene11014_All	647	5.8261	12.5724	7e-10	FAT tumor suppressor homolog 4 (Drosophila) isoform 1 [Equus caballus]
Unigene11015_All	587	2.7827	0	4e-06	Probable G-protein coupled receptor 125 [Harpegnathos saltator]
Unigene11016_All	1111	1.2441	0.7885	1e-10	cyclin A-like [Saccoglossus kowalevskii]
Unigene11017_All	515	3348.63	100.358	2e-27	acyl-CoA-binding protein [Fenneropenaeus chinensis]
Unigene11018_All	885	0	0	3e-31	GG12328 [Drosophila erecta] >gi|190656592|gb|EDV53824.1| GG12328 [Drosophila erecta]
Unigene11019_All	1001	0	0	3e-87	similar to CG5913 CG5913-PA [Tribolium castaneum]
Unigene1101_All	523	12.0124	9.0927	--	--
Unigene11020_All	566	0.666	0	1e-06	baculoviral IAP repeat-containing 6 isoform 2 [Oryctolagus cuniculus]
Unigene11021_All	509	0.4937	0.7376	--	--
Unigene11022_All	1123	0.6713	0.1114	4e-56	Inositol polyphosphate 5-phosphatase OCRL-1 [Camponotus floridanus]
Unigene11023_All	1244	0.303	0	1e-05	poly ADP-ribose polymerase 12-like [Saccoglossus kowalevskii]
Unigene11024_All	518	0	0	--	--
Unigene11025_All	982	2.3032	3.0585	--	--
Unigene11026_All	539	0.2331	0	--	--
Unigene11027_All	783	0.4814	0.3197	--	--
Unigene11028_All	400	5.6542	4.38	--	--
Unigene11029_All	637	1.7753	0.7858	--	--
Unigene1102_All	1376	7.1226	12.5508	4e-42	Transmembrane channel-like protein 6 [Harpegnathos saltator]
Unigene11030_All	588	2.3506	3.8309	--	--
Unigene11031_All	582	5.8291	15.4817	--	--
Unigene11032_All	1616	1.6328	0.7744	--	--
Unigene11033_All	890	0.9883	0.1406	7e-55	similar to LOC495424 protein [Strongylocentrotus purpuratus]
Unigene11034_All	654	1.9213	0.9568	5e-45	Serine/threonine-protein kinase MRCK beta [Camponotus floridanus]
Unigene11035_All	522	0	0	1e-31	calpain B [Gecarcinus lateralis]
Unigene11036_All	581	6.4879	0.4308	2e-18	similar to rGAP-iso [Strongylocentrotus purpuratus] >gi|115941811|ref|XP_001193190.1| similar to rGAP-iso [Strongylocentrotus purpuratus]
Unigene11037_All	929	5.4101	4.9842	2e-35	DDB1- and CUL4-associated factor 13-like [Apis mellifera]
Unigene11038_All	1280	6.9696	1.1732	4e-31	similar to ENSANGP00000004283 [Nasonia vitripennis]
Unigene11039_All	506	4.9664	0	--	--
Unigene1103_All	490	5.1286	16.6007	5e-08	mCG1034352 [Mus musculus]
Unigene11040_All	680	3.5108	1.1042	--	--
Unigene11041_All	612	0	0.409	3e-07	MAX gene-associated protein [Pongo abelii]
Unigene11042_All	931	5.6684	2.554	--	--
Unigene11043_All	483	4.1623	10.623	2e-06	predicted protein [Nematostella vectensis] >gi|156212950|gb|EDO33987.1| predicted protein [Nematostella vectensis]
Unigene11044_All	911	0.1379	0	1e-13	similar to elongin b [Tribolium castaneum]
Unigene11045_All	625	4.0208	4.6053	9e-22	GM30486p [Drosophila melanogaster]
Unigene11046_All	571	0	0	--	--
Unigene11047_All	535	2.8183	0.4678	--	--
Unigene11048_All	647	20.3914	5.6092	--	--
Unigene11049_All	533	11775	29.1141	1e-19	similar to Syne-1B [Strongylocentrotus purpuratus]
Unigene1104_All	925	10.7312	7.1704	3e-37	CG14764 [Drosophila melanogaster] >gi|17862580|gb|AAL39767.1| LD39211p [Drosophila melanogaster] >gi|21627742|gb|AAF59164.2| CG14764 [Drosophila melanogaster]
Unigene11050_All	1335	5.6472	1.4999	7e-76	mitogen-activated protein kinase kinase kinase 1 [Sus scrofa]
Unigene11051_All	544	1.6168	1.1502	3e-06	hypothetical protein [Bos taurus] >gi|297487100|ref|XP_002696034.1| hypothetical protein [Bos taurus] >gi|296476417|gb|DAA18532.1| hypothetical protein BOS_19175 [Bos taurus]
Unigene11052_All	1064	0.1181	0.1176	3e-92	cysteine and histidine-rich protein 1 homolog [Acyrthosiphon pisum]
Unigene11053_All	2019	5.1032	3.1611	1e-99	similar to X-prolyl aminopeptidase (aminopeptidase P) 1, soluble [Gallus gallus]
Unigene11054_All	546	0.2301	0	2e-12	similar to ENSANGP00000011379 [Nasonia vitripennis]
Unigene11055_All	524	0	0	--	--
Unigene11056_All	567	0.2216	0	3e-06	CCAAT displacement protein isoform b variant [Homo sapiens]
Unigene11057_All	1133	3.2161	6.0749	9e-48	hemoglobin [Carcinus maenas]
Unigene11058_All	563	2.2318	0.6668	9e-43	ubiquitin carboxyl-terminal hydrolase 33 [Danio rerio] >gi|46362501|gb|AAH66557.1| Ubiquitin specific peptidase 33 [Danio rerio]
Unigene11059_All	1006	2.8727	1.4928	1e-21	similar to X-prolyl aminopeptidase (aminopeptidase P) 1, soluble [Tribolium castaneum]
Unigene1105_All	498	43.9017	4.7746	--	--
Unigene11060_All	2773	7.114	0.8575	2e-24	RecName: Full=Basic proline-rich protein; Contains: RecName: Full=Proline-rich peptide SP-A; Short=PRP-SP-A; Contains: RecName: Full=Proline-rich peptide SP-B; Short=PRP-SP-B; Contains: RecName: Full=Parotid hormone; AltName: Full=PH-Ab; Flags: Precursor
Unigene11061_All	529	1.6627	1.656	--	--
Unigene11062_All	718	0.175	0	4e-40	sprouty-related protein with EVH-1 domain [Tribolium castaneum]
Unigene11063_All	741	8.648	3.2088	3e-45	mindbomb homolog 2 [Xenopus (Silurana) tropicalis] >gi|170284530|gb|AAI61083.1| mib2 protein [Xenopus (Silurana) tropicalis]
Unigene11064_All	492	1.7877	2.0349	--	--
Unigene11065_All	557	0	0	--	--
Unigene11066_All	551	2.7365	8.4035	--	--
Unigene11067_All	1048	2.1581	1.4329	3e-41	Hypothetical protein GL50581_2285 [Giardia intestinalis ATCC 50581]
Unigene11068_All	986	1.4018	0	--	--
Unigene11069_All	630	1.3961	0.7946	3e-12	Uncharacterized protein KIAA1409 [Camponotus floridanus]
Unigene1106_All	390	130.482	65.4598	3e-44	tropomyosin [Eriocheir sinensis]
Unigene11070_All	1488	0.4222	0.0841	5e-13	Tripeptidyl-peptidase 2 [Harpegnathos saltator]
Unigene11071_All	1673	0.8261	3.2913	1e-124	wings apart-like protein [Tribolium castaneum]
Unigene11072_All	493	0.5097	0	--	--
Unigene11073_All	1818	1.1749	3.4418	2e-50	similar to ubiquitination factor E4 [Tribolium castaneum]
Unigene11074_All	499	4.7843	2.0063	--	--
Unigene11075_All	532	0	0	--	--
Unigene11076_All	515	2.9278	3.402	--	--
Unigene11077_All	1070	0	0	8e-06	CRE-ROL-1 protein [Caenorhabditis remanei] >gi|308263833|gb|EFP07786.1| CRE-ROL-1 protein [Caenorhabditis remanei]
Unigene11078_All	692	0.1816	1.9893	5e-11	similar to chitinase 7 [Nasonia vitripennis]
Unigene11079_All	617	0	0	4e-12	Uncharacterized protein C19orf62-like protein [Harpegnathos saltator]
Unigene1107_All	1176	3.419	38.9478	2e-67	Alpha-aminoadipic semialdehyde synthase, mitochondrial [Camponotus floridanus]
Unigene11080_All	1059	9.0174	22.2163	2e-85	ATP-binding cassette sub-family F member 1-like [Acyrthosiphon pisum]
Unigene11081_All	532	0.2362	0	--	--
Unigene11082_All	983	1.4061	0	2e-08	similar to Tmc5 protein [Strongylocentrotus purpuratus] >gi|115950751|ref|XP_001182227.1| similar to Tmc5 protein [Strongylocentrotus purpuratus]
Unigene11083_All	539	2.7974	1.1609	2e-13	similar to KIAA1694 protein, partial [Strongylocentrotus purpuratus] >gi|115704884|ref|XP_789833.2| similar to KIAA1694 protein, partial [Strongylocentrotus purpuratus]
Unigene11084_All	645	7.013	14.7456	--	--
Unigene11085_All	1015	8.1703	0.6165	2e-45	prophenoloxidase-activating enzyme 2 [Penaeus monodon]
Unigene11086_All	515	0.9759	1.458	--	--
Unigene11087_All	502	1.7521	16.7025	--	--
Unigene11088_All	1133	0.2218	0	2e-28	Dihydrolipoyllysine-residue acetyltransferase component of pyruvate dehydrogenase complex, mitochondrial [Harpegnathos saltator]
Unigene11089_All	789	3.3443	1.2689	1e-37	Exosome complex exonuclease RRP40 [Harpegnathos saltator]
Unigene1108_All	1394	6.0391	25.316	6e-87	ferrochelatase, mitochondrial [Culex quinquefasciatus] >gi|167867960|gb|EDS31343.1| ferrochelatase, mitochondrial [Culex quinquefasciatus]
Unigene11090_All	1630	3.0834	2.1497	7e-54	Probable E3 ubiquitin-protein ligase HERC2 [Camponotus floridanus]
Unigene11091_All	579	1.3021	2.5937	--	--
Unigene11092_All	509	0.2469	0	1e-16	acyl-CoA synthetase bubblegum family member 1, isoform CRA_b [Rattus norvegicus]
Unigene11093_All	1001	0	0.25	1e-12	similar to CG12340 CG12340-PA [Tribolium castaneum]
Unigene11094_All	1415	2.9303	1.2382	--	--
Unigene11095_All	586	1.5009	1.7084	2e-09	similar to ATP-dependent DNA helicase II [Taeniopygia guttata]
Unigene11096_All	1035	0	0	2e-77	Elongation of very long chain fatty acids protein AAEL008004 [Camponotus floridanus]
Unigene11097_All	709	6.9116	0.706	7e-13	chymotrypsin BI [Culex quinquefasciatus] >gi|167868904|gb|EDS32287.1| chymotrypsin BI [Culex quinquefasciatus]
Unigene11098_All	541	2.3225	0.9253	4e-38	Fibrillin-2 [Harpegnathos saltator]
Unigene11099_All	586	1.9298	0.2136	--	--
Unigene1109_All	560	8.0775	6.2572	4e-66	GH13606 [Drosophila grimshawi] >gi|193900099|gb|EDV98965.1| GH13606 [Drosophila grimshawi]
Unigene110_All	1142	16.6139	6.2462	1e-159	Probable RNA-binding protein orb2 [Harpegnathos saltator]
Unigene11100_All	768	0	2.6072	--	--
Unigene11101_All	569	1.1041	0	3e-32	nuclear pore complex protein Nup107 [Rattus norvegicus] >gi|149066873|gb|EDM16606.1| nucleoporin 107, isoform CRA_a [Rattus norvegicus]
Unigene11102_All	533	0	0	1e-35	exocyst complex component 7-like [Acyrthosiphon pisum]
Unigene11103_All	540	1.1634	0.4635	--	--
Unigene11104_All	946	0.2656	0.1323	5e-11	similar to ST7 protein [Strongylocentrotus purpuratus] >gi|115973237|ref|XP_001181872.1| similar to ST7 protein [Strongylocentrotus purpuratus]
Unigene11105_All	558	3.828	1.3456	3e-15	helicase with zinc finger [Culex quinquefasciatus] >gi|167863148|gb|EDS26531.1| helicase with zinc finger [Culex quinquefasciatus]
Unigene11106_All	390	0.6444	0.3209	--	--
Unigene11107_All	605	1.0384	0.2068	1e-12	rutabaga [Tribolium castaneum]
Unigene11108_All	511	2.9507	1.7143	--	--
Unigene11109_All	583	2.8018	1.7172	--	--
Unigene1110_All	1163	9.2914	10.9756	1e-71	GJ10803 [Drosophila virilis] >gi|194142906|gb|EDW59309.1| GJ10803 [Drosophila virilis]
Unigene11110_All	2412	3.8549	2.4385	0	Dystrophin, isoforms A/C/F/G [Harpegnathos saltator]
Unigene11111_All	1388	7.8757	7.3031	1e-110	TEA-domain transcription factor scalloped protein, long form [Daphnia magna]
Unigene11112_All	1145	7.4622	3.4975	6e-71	AKT-interacting protein [Lepeophtheirus salmonis]
Unigene11113_All	498	0	0.5026	--	--
Unigene11114_All	487	5.6762	1.0279	2e-09	AGAP001623-PA [Anopheles gambiae str. PEST] >gi|157012666|gb|EAA00894.4| AGAP001623-PA [Anopheles gambiae str. PEST]
Unigene11115_All	1569	10.3307	0.9571	9e-74	similar to neutral endopeptidase 24.11 isoform 2 [Tribolium castaneum]
Unigene11116_All	1291	2.8225	1.2602	--	--
Unigene11117_All	518	0	0	--	--
Unigene11118_All	2087	9.9942	1330.89	--	--
Unigene11119_All	1378	0.1824	0.1816	2e-46	Helicase domino [Camponotus floridanus]
Unigene1111_All	840	4.6371	15.494	6e-26	probable ATP-dependent RNA helicase YTHDC2-like [Ailuropoda melanoleuca]
Unigene11120_All	622	0.808	0	2e-08	GE18300 [Drosophila yakuba] >gi|194174047|gb|EDW87658.1| GE18300 [Drosophila yakuba]
Unigene11121_All	526	0.9555	0.4758	2e-10	WD repeat, SAM and U-box domain-containing protein 1 isoform 2 [Callithrix jacchus]
Unigene11122_All	560	0	0	--	--
Unigene11123_All	521	3.1352	1.4412	--	--
Unigene11124_All	1078	0	0	5e-32	Structural maintenance of chromosomes protein 3 [Camponotus floridanus]
Unigene11125_All	487	0.516	0.257	--	--
Unigene11126_All	481	2.8735	1.3009	3e-28	trehalase [Danio rerio]
Unigene11127_All	665	2.4563	2.4464	4e-55	GA10519 [Drosophila miranda]
Unigene11128_All	495	1.0154	0.7584	1e-19	similar to AGAP006107-PA [Tribolium castaneum]
Unigene11129_All	587	6.2076	0.6396	--	--
Unigene1112_All	2034	12.2932	12.7974	4e-11	Zinc finger protein 207 [Camponotus floridanus]
Unigene11130_All	612	1.2319	1.4314	--	--
Unigene11131_All	621	0.8093	0	3e-32	zinc finger CCHC domain containing 9 [Scylla paramamosain]
Unigene11132_All	735	3.2481	3.235	6e-16	vacuolar protein sorting-associated protein 13D-like [Xenopus (Silurana) tropicalis]
Unigene11133_All	1530	6.652	13.3323	1e-115	MGC116545 protein [Xenopus laevis]
Unigene11134_All	584	0	0	--	--
Unigene11135_All	564	3.119	2.8845	--	--
Unigene11136_All	614	1.0232	0.4076	8e-73	Cohesin subunit SA-2 [Harpegnathos saltator]
Unigene11137_All	517	1.4582	3.1467	1e-06	X-linked retinitis pigmentosa GTPase regulator-like protein [Camponotus floridanus]
Unigene11138_All	1339	9.853	2.9907	3e-23	baculoviral IAP repeat-containing protein 6 [Danio rerio]
Unigene11139_All	511	4.1801	5.6327	1e-12	GK17072 [Drosophila willistoni] >gi|194157738|gb|EDW72639.1| GK17072 [Drosophila willistoni]
Unigene1113_All	938	5.894	10.1396	1e-65	Acyl-CoA:lysophosphatidylglycerol acyltransferase 1 [Harpegnathos saltator]
Unigene11140_All	728	10.0106	97.4677	--	--
Unigene11141_All	519	0.4842	0.9645	4e-10	molluscan shell protein 1 [Mizuhopecten yessoensis]
Unigene11142_All	577	10.2349	14.9652	6e-08	GG17727 [Drosophila erecta] >gi|190652339|gb|EDV49594.1| GG17727 [Drosophila erecta]
Unigene11143_All	604	0.4161	0	--	--
Unigene11144_All	508	0	0	1e-22	similar to CG6133 CG6133-PA [Tribolium castaneum]
Unigene11145_All	555	0	0	--	--
Unigene11146_All	537	0.468	0	--	--
Unigene11147_All	458	0	0	--	--
Unigene11148_All	580	3.6828	1.7261	4e-27	Ras GTPase-activating protein 3 [Camponotus floridanus]
Unigene11149_All	1000	2.2617	98.8636	--	--
Unigene1114_All	578	17.8257	113.669	2e-33	similar to CG11009 CG11009-PA [Tribolium castaneum]
Unigene11150_All	610	0	0	--	--
Unigene11151_All	796	6.1562	2.6727	1e-49	ACYPI005632 [Acyrthosiphon pisum]
Unigene11152_All	1536	2.4541	2.4442	5e-74	fushi tarazu-factor 1 [Metapenaeus ensis]
Unigene11153_All	526	2.3888	0	--	--
Unigene11154_All	679	3.701	0.9215	--	--
Unigene11155_All	719	0	0	--	--
Unigene11156_All	1423	3.0905	4.3972	1e-06	subtilisin, putative [Toxoplasma gondii VEG]
Unigene11157_All	551	1.8243	0.4542	--	--
Unigene11158_All	882	4.8436	1.7026	--	--
Unigene11159_All	613	2.4597	6.1245	--	--
Unigene1115_All	624	6.6449	15.2419	5e-11	voltage gated chloride channel domain-containing protein [Toxoplasma gondii ME49] >gi|211966343|gb|EEB01539.1| voltage gated chloride channel domain-containing protein [Toxoplasma gondii ME49]
Unigene11160_All	672	0.7479	0.1862	3e-14	Vacuolar protein sorting-associated protein 11-like protein [Harpegnathos saltator]
Unigene11161_All	745	0	0	--	--
Unigene11162_All	587	18.8368	186.33	--	--
Unigene11163_All	1341	1.1244	0.4666	1e-39	PAN3 poly(A) specific ribonuclease subunit homolog [Saccoglossus kowalevskii]
Unigene11164_All	840	1.1967	0.4469	--	--
Unigene11165_All	544	0.4619	0.23	--	--
Unigene11166_All	518	0.2426	1.4495	--	--
Unigene11167_All	560	3.1412	0.4469	--	--
Unigene11168_All	801	1.2549	0	5e-58	Aga protein [Mus musculus]
Unigene11169_All	581	3.6765	2.5847	4e-06	Bradeion alpha [Homo sapiens]
Unigene1116_All	630	14.1605	36.1526	--	--
Unigene11170_All	1127	0.3345	0.2221	2e-81	Deoxyhypusine hydroxylase/monooxygenase [Mus musculus]
Unigene11171_All	553	2.2721	3.1682	--	--
Unigene11172_All	631	0.3983	0	--	--
Unigene11173_All	1221	1.0291	0.1025	3e-48	similar to AGAP005275-PA [Tribolium castaneum]
Unigene11174_All	643	2.7358	3.5032	--	--
Unigene11175_All	559	0	0	--	--
Unigene11176_All	527	5.9606	0.4749	8e-16	Protein sidekick [Camponotus floridanus]
Unigene11177_All	512	0	1.9554	--	--
Unigene11178_All	2253	3.625	7.8874	0	similar to aldehyde dehydrogenase 7 family, member A1 [Tribolium castaneum]
Unigene11179_All	384	10.1436	6.8438	--	--
Unigene1117_All	1367	4.5039	22.795	--	--
Unigene11180_All	564	0.6683	0	3e-09	C12orf41 homolog [Caligus rogercresseyi]
Unigene11181_All	1004	1.6269	2.2436	--	--
Unigene11182_All	593	0.2119	0	6e-32	centaurin-alpha 1-like protein [Marsupenaeus japonicus]
Unigene11183_All	603	0	0	--	--
Unigene11184_All	1282	0.098	0.0976	--	--
Unigene11185_All	562	6.9309	2.4494	--	--
Unigene11186_All	507	0	0	--	--
Unigene11187_All	556	2.0339	1.5756	3e-62	kinesin-2 subunit [Octopus tankahkeei]
Unigene11188_All	953	4.6146	1.3132	4e-13	similar to NADPH oxidase 4 isoform 1 [Equus caballus]
Unigene11189_All	519	0	0	4e-24	similar to rho-associated protein kinase 1 [Tribolium castaneum]
Unigene1118_All	424	4.4452	5.0176	--	--
Unigene11190_All	561	0	0	--	--
Unigene11191_All	557	4.2861	2.4714	--	--
Unigene11192_All	564	0	0	--	--
Unigene11193_All	493	6.1168	3.8076	--	--
Unigene11194_All	573	2.6314	1.3104	4e-21	GJ20879 [Drosophila virilis] >gi|194144000|gb|EDW60396.1| GJ20879 [Drosophila virilis]
Unigene11195_All	739	3.5706	2.2014	6e-56	MDN1, midasin homolog [Saccoglossus kowalevskii]
Unigene11196_All	579	6.0763	1.7291	7e-06	hypothetical protein [Saccoglossus kowalevskii]
Unigene11197_All	911	3.8619	1.5111	--	--
Unigene11198_All	637	3.3533	2.3575	6e-28	WD repeat-containing protein 32-like protein [Harpegnathos saltator]
Unigene11199_All	520	1.4498	0.2407	5e-30	phosphatidate cytidylyltransferase, photoreceptor-specific-like isoform 1 [Acyrthosiphon pisum]
Unigene1119_All	898	269.21	136.85	1e-141	glutamine: fructose-6-phosphate aminotransferase [Haemaphysalis longicornis]
Unigene111_All	2689	7.4296	38.674	0	casein kinase [Aedes aegypti] >gi|108880012|gb|EAT44237.1| casein kinase [Aedes aegypti]
Unigene11200_All	2168	4.5206	26.5526	0	cathepsin C [Litopenaeus vannamei]
Unigene11201_All	538	2.3355	0	--	--
Unigene11202_All	556	2.7119	0.6752	1e-23	fibroleukin-like [Xenopus (Silurana) tropicalis]
Unigene11203_All	1387	3.986	6.2256	2e-36	sestrin 2 [Oryctolagus cuniculus]
Unigene11204_All	545	0	0.2296	7e-23	similar to LSM1-like protein [Nasonia vitripennis]
Unigene11205_All	641	0	0	2e-12	mediator of RNA polymerase II transcription subunit 21 [Danio rerio] >gi|82188302|sp|Q7ZTI5.1|MED21_DANRE RecName: Full=Mediator of RNA polymerase II transcription subunit 21; AltName: Full=Mediator complex subunit 21; AltName: Full=RNA polymerase II holoenzyme component SRB7; Short=RNAPII complex component SRB7 >gi|29294697|gb|AAH49042.1| Mediator complex subunit 21 [Danio rerio] >gi|94734464|em…
Unigene11206_All	485	2.3316	5.6766	--	--
Unigene11207_All	1665	7.1692	3.4574	3e-08	T. brucei spp.-specific protein [Trypanosoma brucei gambiense DAL972]
Unigene11208_All	1445	2.2608	1.2991	1e-128	uridine phosphorylase 1-like [Apis mellifera]
Unigene11209_All	501	0	0	--	--
Unigene1120_All	1603	240.796	112.106	1e-168	map kinase-interacting serine/threonine [Scylla paramamosain]
Unigene11210_All	928	3.9266	0.8091	--	--
Unigene11211_All	583	4.957	25.5439	--	--
Unigene11212_All	2535	0.1983	0.1481	1e-107	UPF0555 protein KIAA0776-like protein [Camponotus floridanus]
Unigene11213_All	877	6.0174	0.9989	3e-09	inter-alpha (globulin) inhibitor H3 [Danio rerio] >gi|72679321|gb|AAI00122.1| Inter-alpha (globulin) inhibitor H3 [Danio rerio]
Unigene11214_All	942	10.9377	22.7172	6e-30	visgun, isoform C [Drosophila melanogaster] >gi|24661852|ref|NP_729534.1| visgun, isoform D [Drosophila melanogaster] >gi|7294888|gb|AAF50218.1| visgun, isoform C [Drosophila melanogaster] >gi|23093790|gb|AAN11952.1| visgun, isoform D [Drosophila melanogaster] >gi|289526393|gb|ADD01319.1| GH23431p [Drosophila melanogaster]
Unigene11215_All	510	1.7246	0.9815	2e-15	UPF0472 protein C16orf72-like protein [Camponotus floridanus]
Unigene11216_All	726	0	0	--	--
Unigene11217_All	578	15.8693	43.7354	--	--
Unigene11218_All	493	3.0584	0.2538	2e-35	TPA: pol polyprotein [Schistosoma mansoni]
Unigene11219_All	765	0.9855	0.3272	8e-29	Protein FAM44A [Harpegnathos saltator]
Unigene1121_All	1650	11.3466	8.9497	1e-175	similar to CG9448 CG9448-PA [Tribolium castaneum]
Unigene11220_All	982	4.3504	4.078	2e-13	AGAP008432-PA [Anopheles gambiae str. PEST] >gi|116122930|gb|EAA12719.3| AGAP008432-PA [Anopheles gambiae str. PEST]
Unigene11221_All	506	4.2214	1.4839	4e-18	precollagen-D [Mytilus californianus]
Unigene11222_All	536	21.3323	2.8017	--	--
Unigene11223_All	987	1.655	0.8875	2e-26	GD19966 [Drosophila simulans] >gi|194198486|gb|EDX12062.1| GD19966 [Drosophila simulans]
Unigene11224_All	652	1.1563	3.6468	--	--
Unigene11225_All	2308	0.9799	0.2711	1e-101	similar to arylsulfatase D [Ornithorhynchus anatinus]
Unigene11226_All	1052	0.3583	0.2379	6e-30	similar to sulfide dehydrogenase like [Ciona intestinalis]
Unigene11227_All	670	0	0	2e-42	glycosyltransferase-like protein LARGE1 [Danio rerio] >gi|82083911|sp|Q66PG2.1|LARGE_DANRE RecName: Full=Glycosyltransferase-like protein LARGE1; AltName: Full=Acetylglucosaminyltransferase-like 1A >gi|51872295|gb|AAU12251.1| glycosyltransferase-like 1A [Danio rerio] >gi|190336617|gb|AAI62096.1| Like-glycosyltransferase [Danio rerio]
Unigene11228_All	363	11.4227	36.8881	6e-06	THAP domain-containing protein 4 [Anoplopoma fimbria]
Unigene11229_All	557	0.9023	0.674	1e-06	phosphorylated adapter RNA export protein-like [Xenopus (Silurana) tropicalis]
Unigene1122_All	1404	35.1712	70.1482	1e-131	transaldolase [Aedes aegypti] >gi|108874520|gb|EAT38745.1| transaldolase [Aedes aegypti]
Unigene11230_All	545	0.4611	0	--	--
Unigene11231_All	537	0.702	0.233	--	--
Unigene11232_All	526	5.4942	0	--	--
Unigene11233_All	1009	1.1208	0.7442	--	--
Unigene11234_All	567	0	0	5e-06	RecName: Full=Uncharacterized protein C6orf132 homolog
Unigene11235_All	1356	6.3937	5.6296	3e-68	Probable E3 ubiquitin-protein ligase TRIP12 [Harpegnathos saltator]
Unigene11236_All	491	1.2795	0.2549	1e-32	U88 [Brugia malayi]
Unigene11237_All	561	0	0	1e-11	Mediator of RNA polymerase II transcription subunit 13 [Harpegnathos saltator]
Unigene11238_All	538	7.24	1.6283	--	--
Unigene11239_All	554	1.134	0.9036	2e-11	similar to Solute carrier family 44, member 4 [Strongylocentrotus purpuratus]
Unigene1123_All	1669	8.206	13.5716	1e-110	1-acyl-sn-glycerol-3-phosphate acyltransferase theta [Harpegnathos saltator]
Unigene11240_All	1256	2.2009	1.6938	9e-17	histidine-rich protein [Plasmodium falciparum]
Unigene11241_All	535	0.4697	0	2e-13	similar to exocyst complex component sec6 [Nasonia vitripennis]
Unigene11242_All	670	7.5015	0.5603	3e-35	GK16432 [Drosophila willistoni] >gi|194163543|gb|EDW78444.1| GK16432 [Drosophila willistoni]
Unigene11243_All	1027	8.9313	2.0715	--	--
Unigene11244_All	581	0	0	4e-12	AGAP004473-PA [Anopheles gambiae str. PEST] >gi|157017332|gb|EDO64141.1| AGAP004473-PA [Anopheles gambiae str. PEST]
Unigene11245_All	473	2.1252	0.7937	4e-13	alanine--glyoxylate aminotransferase 2-like 1 [Bos taurus] >gi|75060947|sp|Q5E9S4.1|AT2L1_BOVIN RecName: Full=Alanine--glyoxylate aminotransferase 2-like 1 >gi|59858057|gb|AAX08863.1| alanine-glyoxylate aminotransferase 2-like 1 [Bos taurus] >gi|115305318|gb|AAI23421.1| Alanine-glyoxylate aminotransferase 2-like 1 [Bos taurus] >gi|296486758|gb|DAA28871.1| alanine--glyoxylate aminotransferase 2-li…
Unigene11246_All	521	0.2412	0.2402	1e-27	similar to Pecanex-like protein 1 (Pecanex homolog) [Tribolium castaneum]
Unigene11247_All	1825	4.8194	2.4	1e-17	Histidine-rich glycoprotein precursor [Brugia malayi]
Unigene11248_All	904	9.5905	1.6612	9e-37	beat protein [Culex quinquefasciatus] >gi|167879668|gb|EDS43051.1| beat protein [Culex quinquefasciatus]
Unigene11249_All	567	3.7673	1.7657	--	--
Unigene1124_All	2943	126.802	35.5488	0	similar to oligosaccharyl transferase [Tribolium castaneum]
Unigene11250_All	495	6.0921	1.5169	1e-15	cullin 2, isoform CRA_c [Mus musculus]
Unigene11251_All	1086	4.1652	1.959	9e-58	similar to Uncharacterized protein FLJ10769 [Ciona intestinalis]
Unigene11252_All	679	0	0	2e-41	synaptobrevin homolog YKT6-like isoform 2 [Acyrthosiphon pisum] >gi|193676348|ref|XP_001952152.1| synaptobrevin homolog YKT6-like isoform 1 [Acyrthosiphon pisum]
Unigene11253_All	530	3.082	1.6528	--	--
Unigene11254_All	2084	15.6761	0.3603	5e-29	reverse transcriptase [Penaeus monodon]
Unigene11255_All	543	2.314	0.2305	4e-22	Serine/threonine-protein kinase ULK2 [Harpegnathos saltator]
Unigene11256_All	1352	0.2788	0.4628	5e-85	RAB18, member RAS oncogene family [Xenopus (Silurana) tropicalis] >gi|89267454|emb|CAJ81541.1| RAB18, member RAS oncogene family [Xenopus (Silurana) tropicalis] >gi|134026214|gb|AAI35987.1| RAB18, member RAS oncogene family [Xenopus (Silurana) tropicalis]
Unigene11257_All	1437	4.8091	4.7027	2e-45	similar to CG5758 CG5758-PA [Tribolium castaneum]
Unigene11258_All	1434	2.3658	3.4035	5e-68	Protein son of sevenless [Harpegnathos saltator]
Unigene11259_All	2112	5.8898	3.4367	1e-118	Dynein heavy chain, cytoplasmic [Camponotus floridanus]
Unigene1125_All	1442	2.8755	50.422	3e-21	Inositol-tetrakisphosphate 1-kinase [Camponotus floridanus]
Unigene11260_All	465	6.7554	2.4221	--	--
Unigene11261_All	474	0	0	--	--
Unigene11262_All	1884	0.2001	0.1328	0	vacuolar ATP synthase subunit B K form [Carcinus maenas] >gi|7677489|gb|AAF67183.1|AF247971_1 vacuolar ATP synthase subunit B L form [Carcinus maenas]
Unigene11263_All	936	1.8794	4.8132	4e-61	similar to dolichyl-phosphate mannosyltransferase polypeptide 1, catalytic subunit [Equus caballus]
Unigene11264_All	540	4.1883	1.3905	4e-36	fibrillin 1-like [Saccoglossus kowalevskii]
Unigene11265_All	643	2.3449	0.1946	--	--
Unigene11266_All	997	3.4028	5.3974	--	--
Unigene11267_All	546	4.1423	1.6044	1e-23	similar to Midasin (MIDAS-containing protein) [Equus caballus]
Unigene11268_All	541	0	0.2313	2e-09	LOW QUALITY PROTEIN: retinoblastoma-like protein 1-like [Pongo abelii]
Unigene11269_All	900	1.8149	1.8076	7e-47	RNA 3'-terminal phosphate cyclase-like protein [Danio rerio] >gi|49619019|gb|AAT68094.1| RNA 3'-terminal phosphate cyclase-like protein [Danio rerio]
Unigene1126_All	2084	10.4306	64.1932	1e-114	F-actin-capping protein subunit alpha [Harpegnathos saltator]
Unigene11270_All	633	3.7715	2.1747	7e-21	reverse transcriptase [Penaeus monodon]
Unigene11271_All	1167	2.2611	1.3941	--	--
Unigene11272_All	647	2.9131	0.1934	1e-22	staufen [Tribolium castaneum]
Unigene11273_All	564	0	0	9e-25	similar to topoisomerase II [Nasonia vitripennis]
Unigene11274_All	565	3.1134	0.886	--	--
Unigene11275_All	757	0.9959	0.6613	5e-07	GI24295 [Drosophila mojavensis] >gi|251764766|sp|B4K982.1|LST2_DROMO RecName: Full=Lateral signaling target protein 2 homolog >gi|193915628|gb|EDW14495.1| GI24295 [Drosophila mojavensis]
Unigene11276_All	512	2.2087	1.9554	--	--
Unigene11277_All	1638	0.6904	3.2088	4e-09	U88 [Brugia malayi]
Unigene11278_All	2927	2.7045	1.8385	1e-156	sodium-dependent phosphate transporter 1-B-like [Apis mellifera]
Unigene11279_All	688	0.3653	6.0025	3e-53	structural maintenance of chromosomes protein 3 [Apis mellifera]
Unigene1127_All	976	22.5294	59.3664	6e-07	AGAP004873-PA [Anopheles gambiae str. PEST] >gi|157016902|gb|EAA09692.4| AGAP004873-PA [Anopheles gambiae str. PEST]
Unigene11280_All	547	2.2971	2.2878	5e-09	Rho GTPase-activating protein 5 [Camponotus floridanus]
Unigene11281_All	529	2.1377	2.8388	--	--
Unigene11282_All	699	4.1344	7.8774	2e-39	similar to chromosome 1 open reading frame 50 [Ornithorhynchus anatinus]
Unigene11283_All	556	3.6158	0.2251	--	--
Unigene11284_All	513	0.7348	0.9758	2e-14	similar to haloacid dehalogenase-like hydrolase domain containing 1A, partial [Strongylocentrotus purpuratus] >gi|115963108|ref|XP_001183298.1| similar to haloacid dehalogenase-like hydrolase domain containing 1A, partial [Strongylocentrotus purpuratus]
Unigene11285_All	528	0	0	8e-29	similar to Trisn small nuclear ribonucleoprotein [Tribolium castaneum]
Unigene11286_All	573	0.6579	0	7e-49	ruvB-like 2-like [Callithrix jacchus]
Unigene11287_All	916	2.4691	1.6394	--	--
Unigene11288_All	531	3.3128	2.1211	2e-26	similar to LReO_3 [Strongylocentrotus purpuratus] >gi|115924837|ref|XP_001189981.1| similar to LReO_3 [Strongylocentrotus purpuratus]
Unigene11289_All	1048	0.2398	0	1e-102	similar to dre4 CG1828-PA [Tribolium castaneum]
Unigene1128_All	926	179.926	120.414	2e-06	GG11545 [Drosophila erecta] >gi|190656192|gb|EDV53424.1| GG11545 [Drosophila erecta]
Unigene11290_All	521	2.4117	0.7206	--	--
Unigene11291_All	535	0.4697	0	2e-15	zinc finger protein 300-like, partial [Saccoglossus kowalevskii]
Unigene11292_All	1632	3.9266	1.6103	--	--
Unigene11293_All	1756	1.3595	0.0713	--	--
Unigene11294_All	573	0	0.6552	--	--
Unigene11295_All	592	2.7592	3.805	1e-20	Nuclear pore complex protein Nup155 [Camponotus floridanus]
Unigene11296_All	1010	2.2393	2.1064	8e-55	Fas associated factor family member 2 [Taeniopygia guttata]
Unigene11297_All	547	0	0.6863	--	--
Unigene11298_All	1145	3.6213	1.9673	1e-103	Aminoacylase-1 [Salmo salar] >gi|209153984|gb|ACI33224.1| Aminoacylase-1 [Salmo salar] >gi|223649268|gb|ACN11392.1| Aminoacylase-1 [Salmo salar]
Unigene11299_All	603	0.8335	0.4151	--	--
Unigene1129_All	1639	109.014	23.2879	1e-155	Orphan sodium- and chloride-dependent neurotransmitter transporter NTT4 [Camponotus floridanus]
Unigene112_All	1750	28.0738	18.4498	1e-128	similar to synaptic vesicle protein [Tribolium castaneum]
Unigene11300_All	513	2.6942	0.2439	2e-14	similar to MGC83562 protein [Strongylocentrotus purpuratus] >gi|115940449|ref|XP_001183997.1| similar to MGC83562 protein [Strongylocentrotus purpuratus]
Unigene11301_All	575	5.026	2.1764	1e-12	similar to bric-a-brac [Tribolium castaneum]
Unigene11302_All	492	5.6185	1.7805	1e-16	similar to camp and camp-inhibited cgmp 3,5-cyclic phosphodiesterase [Strongylocentrotus purpuratus] >gi|115956163|ref|XP_001188724.1| similar to camp and camp-inhibited cgmp 3,5-cyclic phosphodiesterase [Strongylocentrotus purpuratus]
Unigene11303_All	538	2.8026	2.5587	2e-08	similar to conserved hypothetical protein [Tribolium castaneum]
Unigene11304_All	998	2.2662	0.5016	4e-78	similar to fibrillin 2 [Tribolium castaneum]
Unigene11305_All	552	3.642	2.2671	6e-22	saxophone [Tribolium castaneum]
Unigene11306_All	503	2.498	0	7e-16	similar to mCG115602 [Ciona intestinalis]
Unigene11307_All	553	3.6354	1.1315	3e-15	Probable E3 ubiquitin-protein ligase MYCBP2 [Harpegnathos saltator]
Unigene11308_All	731	0.5157	0	4e-14	GL20244 [Drosophila persimilis] >gi|194105460|gb|EDW27503.1| GL20244 [Drosophila persimilis]
Unigene11309_All	522	4.8142	0.959	--	--
Unigene1130_All	853	60.9836	764.067	1e-99	similar to reticulocalbin [Tribolium castaneum]
Unigene11310_All	856	0.5871	0.2924	3e-39	CRE-MLP-1 protein [Caenorhabditis remanei] >gi|308242701|gb|EFO86653.1| CRE-MLP-1 protein [Caenorhabditis remanei]
Unigene11311_All	599	0	0.4178	7e-23	similar to guanine nucleotide binding protein-like 2 (nucleolar), partial [Ciona intestinalis]
Unigene11312_All	569	0.2208	0.8797	--	--
Unigene11313_All	993	2.4042	0.3781	4e-52	lightoid, isoform C [Drosophila melanogaster] >gi|24652028|ref|NP_724765.1| lightoid, isoform E [Drosophila melanogaster] >gi|17861992|gb|AAL39473.1| LD04613p [Drosophila melanogaster] >gi|21627636|gb|AAM68817.1| lightoid, isoform C [Drosophila melanogaster] >gi|21627637|gb|AAM68818.1| lightoid, isoform E [Drosophila melanogaster]
Unigene11314_All	435	10.1098	1.1507	--	--
Unigene11315_All	624	2.0136	0.8022	5e-16	AGAP002652-PA [Anopheles gambiae str. PEST] >gi|157018022|gb|EAA08164.4| AGAP002652-PA [Anopheles gambiae str. PEST]
Unigene11316_All	547	3.6753	1.8303	--	--
Unigene11317_All	1286	3.6151	4.0871	3e-08	reverse transcriptase [Penaeus monodon]
Unigene11318_All	702	5.3696	3.9219	2e-06	gametogenetin-like [Bos taurus]
Unigene11319_All	567	0	0.2207	8e-06	super cysteine rich protein [Homo sapiens]
Unigene1131_All	1226	18.0378	238.038	--	--
Unigene11320_All	857	1.7594	5.2569	1e-28	Supervillin [Harpegnathos saltator]
Unigene11321_All	412	10.9791	0	--	--
Unigene11322_All	656	6.5123	0	--	--
Unigene11323_All	554	0.4536	0.2259	--	--
Unigene11324_All	566	0	0	1e-07	gem (nuclear organelle) associated protein 6-like [Saccoglossus kowalevskii]
Unigene11325_All	734	0	0	6e-37	GI19176 [Drosophila mojavensis] >gi|193910335|gb|EDW09202.1| GI19176 [Drosophila mojavensis]
Unigene11326_All	854	0.4414	1.3188	--	--
Unigene11327_All	473	2.6564	0.7937	--	--
Unigene11328_All	703	1.6086	0.8901	--	--
Unigene11329_All	544	3.2336	2.0704	8e-09	similar to nucleoredoxin [Nasonia vitripennis]
Unigene1132_All	777	250.491	259.79	2e-41	CD63 antigen-like [Saccoglossus kowalevskii]
Unigene11330_All	954	0	0	1e-30	dual specificity tyrosine-phosphorylation-regulated kinase 1A [Danio rerio]
Unigene11331_All	525	0.9573	0	3e-10	synaptic ras GTPase activating protein [Culex quinquefasciatus] >gi|167876147|gb|EDS39530.1| synaptic ras GTPase activating protein [Culex quinquefasciatus]
Unigene11332_All	731	10.657	0.5136	--	--
Unigene11333_All	591	0.4252	0	--	--
Unigene11334_All	863	1.8928	1.1601	2e-60	similar to n-acetyltransferase [Tribolium castaneum]
Unigene11335_All	975	3.2218	1.9253	7e-14	similar to GA17922-PA [Nasonia vitripennis]
Unigene11336_All	550	2.9699	1.8203	4e-07	hypothetical protein [Gallus gallus]
Unigene11337_All	630	0.9972	4.966	3e-15	GL17837 [Drosophila persimilis] >gi|198462746|ref|XP_001352539.2| GA18625 [Drosophila pseudoobscura pseudoobscura] >gi|194108391|gb|EDW30434.1| GL17837 [Drosophila persimilis] >gi|198150960|gb|EAL30036.2| GA18625 [Drosophila pseudoobscura pseudoobscura]
Unigene11338_All	611	0	0	--	--
Unigene11339_All	1567	1.4433	1.9167	4e-18	similar to Est1p-like protein B [Tribolium castaneum]
Unigene1133_All	1463	5.9261	11.3767	--	--
Unigene11340_All	550	0	0	--	--
Unigene11341_All	1279	3.6349	2.7397	3e-52	clavesin-2 [Danio rerio] >gi|75570919|sp|Q5SPP0.1|CLVS2_DANRE RecName: Full=Clavesin-2; AltName: Full=Retinaldehyde-binding protein 1-like 2 >gi|55962607|emb|CAI11724.1| novel protein [Danio rerio] >gi|94574152|gb|AAI16476.1| Si:ch211-199i15.4 [Danio rerio]
Unigene11342_All	612	6.5699	0.6134	4e-20	similar to RIKEN cDNA 3110050K21 [Monodelphis domestica]
Unigene11343_All	551	0.9122	0.9085	--	--
Unigene11344_All	547	6.8912	0.6863	9e-10	GJ17984 [Drosophila virilis] >gi|194141308|gb|EDW57727.1| GJ17984 [Drosophila virilis]
Unigene11345_All	1063	9.8108	0.1177	6e-16	similar to zinc finger protein, partial [Strongylocentrotus purpuratus] >gi|115976272|ref|XP_001180223.1| similar to zinc finger protein, partial [Strongylocentrotus purpuratus]
Unigene11346_All	541	2.7871	1.6192	--	--
Unigene11347_All	566	1.11	0.2211	3e-29	Dual specificity mitogen-activated protein kinase kinase 7 [Harpegnathos saltator]
Unigene11348_All	1543	6.5146	0.9733	2e-53	Glutaminase kidney isoform, mitochondrial [Harpegnathos saltator]
Unigene11349_All	624	5.034	1.805	--	--
Unigene1134_All	724	13.1898	18.8407	--	--
Unigene11350_All	1936	3.959	2.1331	1e-103	Pre-mRNA-processing factor 39 [Camponotus floridanus]
Unigene11351_All	1058	0.3563	0.3548	1e-16	HLA class III protein Dom3z [Culex quinquefasciatus] >gi|167877280|gb|EDS40663.1| HLA class III protein Dom3z [Culex quinquefasciatus]
Unigene11352_All	1949	4.3839	3.2747	2e-32	similar to CG31534 CG31534-PA [Tribolium castaneum]
Unigene11353_All	583	0.2155	0	--	--
Unigene11354_All	1390	1.9887	0.9003	4e-84	vacuolar ATP synthase subunit ac39 [Aedes aegypti] >gi|94469114|gb|ABF18406.1| vacuolar H+-ATPase V0 sector subunit d [Aedes aegypti] >gi|108872708|gb|EAT36933.1| vacuolar ATP synthase subunit ac39 [Aedes aegypti]
Unigene11355_All	888	7.2164	55.8074	4e-40	protein OPI10 homolog [Apis mellifera]
Unigene11356_All	550	1.3707	0	1e-29	Serine/threonine-protein phosphatase 5 [Camponotus floridanus]
Unigene11357_All	597	0.4209	0	--	--
Unigene11358_All	417	7.8343	2.7009	3e-11	GRAM domain containing 4 [Taeniopygia guttata]
Unigene11359_All	558	2.7021	0.6728	1e-10	centromere/kinetochore protein zw10-like [Saccoglossus kowalevskii]
Unigene1135_All	1997	51.3421	10.9665	1e-161	Na/Pi cotransport system protein [Pseudopleuronectes americanus] >gi|1763236|gb|AAB39696.1| Na/Pi cotransporter [Pseudopleuronectes americanus]
Unigene11360_All	522	18.7753	0.2397	--	--
Unigene11361_All	1256	1.3005	22.219	4e-06	mannose binding lectin (C), isoform CRA_a [Mus musculus]
Unigene11362_All	525	5.026	2.3837	--	--
Unigene11363_All	1892	2.8557	22.2904	1e-153	similar to nop5 CG10206-PA [Tribolium castaneum]
Unigene11364_All	1230	1.2259	0.2035	--	--
Unigene11365_All	567	0	0	9e-17	similar to ENSANGP00000008373 [Nasonia vitripennis]
Unigene11366_All	492	0.2554	0	--	--
Unigene11367_All	1894	0.5971	0.1982	--	--
Unigene11368_All	2576	7.9507	2.1861	6e-71	similar to forkhead box transcription factor subgroup N1 [Tribolium castaneum]
Unigene11369_All	514	3.9113	0.2435	2e-20	AGAP001314-PA [Anopheles gambiae str. PEST] >gi|157012855|gb|EAA01192.4| AGAP001314-PA [Anopheles gambiae str. PEST]
Unigene1136_All	2284	22.7754	112.158	1e-128	similar to GA15301-PA [Tribolium castaneum]
Unigene11370_All	503	0	0.4976	5e-16	similar to DNA repair protein xp-e [Nasonia vitripennis]
Unigene11371_All	545	5.0721	9.8737	--	--
Unigene11372_All	965	0	0	1e-09	vesicle-trafficking protein sec22a [Ictalurus furcatus]
Unigene11373_All	806	11.692	51.3928	7e-11	RPGR [Callithrix jacchus]
Unigene11374_All	592	8.4899	86.0363	1e-25	IQ calmodulin-binding motif domain-containing protein [Toxoplasma gondii ME49] >gi|211962264|gb|EEA97459.1| IQ calmodulin-binding motif domain-containing protein [Toxoplasma gondii ME49]
Unigene11375_All	507	5.2044	2.7152	--	--
Unigene11376_All	541	0.4645	0	--	--
Unigene11377_All	1145	0	0	1e-108	vesicle amine transport protein [Bombyx mori] >gi|95103100|gb|ABF51491.1| vesicle amine transport protein [Bombyx mori]
Unigene11378_All	571	0	0	--	--
Unigene11379_All	1261	1.5943	1.7864	1e-05	sphingomyelin phosphodiesterase 4, neutral membrane (neutral sphingomyelinase-3) [Xenopus (Silurana) tropicalis] >gi|160773900|gb|AAI55502.1| LOC100127861 protein [Xenopus (Silurana) tropicalis]
Unigene1137_All	1005	9.1268	30.1341	1e-87	ras-related protein Rab-35-like [Acyrthosiphon pisum]
Unigene11380_All	494	1.5261	0.5067	--	--
Unigene11381_All	1682	4.258	6.9938	1e-157	RecName: Full=Tryptophanyl-tRNA synthetase, cytoplasmic; AltName: Full=Tryptophan--tRNA ligase; Short=TrpRS; Contains: RecName: Full=T1-TrpRS; Contains: RecName: Full=T2-TrpRS >gi|74354933|gb|AAI02807.1| WARS protein [Bos taurus] >gi|296475163|gb|DAA17278.1| tryptophanyl-tRNA synthetase, cytoplasmic [Bos taurus]
Unigene11382_All	732	4.9779	2.0515	3e-23	Chaoptin [Harpegnathos saltator]
Unigene11383_All	526	1.6721	0	--	--
Unigene11384_All	618	2.6431	0.81	3e-07	hypothetical protein IscW_ISCW023205 [Ixodes scapularis] >gi|215510458|gb|EEC19911.1| hypothetical protein IscW_ISCW023205 [Ixodes scapularis]
Unigene11385_All	544	1.6168	0.6901	2e-09	T-cell receptor beta chain ANA 11 [Brugia malayi]
Unigene11386_All	509	4.1966	2.4586	1e-19	Trinucleotide repeat-containing gene 6C protein [Harpegnathos saltator]
Unigene11387_All	1039	1.6931	1.9271	2e-12	sorting and assembly machinery component 50 homolog B [Xenopus laevis] >gi|82186725|sp|Q6PA35.1|SAM5B_XENLA RecName: Full=Sorting and assembly machinery component 50 homolog B >gi|38014784|gb|AAH60470.1| MGC68698 protein [Xenopus laevis]
Unigene11388_All	606	2.2808	2.0651	9e-08	voltage gated chloride channel domain-containing protein [Toxoplasma gondii ME49] >gi|211966343|gb|EEB01539.1| voltage gated chloride channel domain-containing protein [Toxoplasma gondii ME49]
Unigene11389_All	1001	2.7615	0.5001	3e-47	similar to ENSANGP00000015073 [Nasonia vitripennis]
Unigene1138_All	1819	9.2562	44.994	3e-27	proline-rich protein BstNI subfamily 1 [Mus musculus] >gi|15029903|gb|AAH11176.1| Proline-rich protein BstNI subfamily 1 [Mus musculus]
Unigene11390_All	552	3.8696	2.7205	--	--
Unigene11391_All	1369	0.5507	0.8227	1e-119	GI24684 [Drosophila mojavensis] >gi|193916325|gb|EDW15192.1| GI24684 [Drosophila mojavensis]
Unigene11392_All	542	2.5501	0.2309	4e-27	cytoplasmic FMR1-interacting protein [Culex quinquefasciatus] >gi|167881861|gb|EDS45244.1| cytoplasmic FMR1-interacting protein [Culex quinquefasciatus]
Unigene11393_All	523	0.2402	0	--	--
Unigene11394_All	555	3.6223	6.3136	4e-09	G protein gamma subunit [Ornithodoros parkeri]
Unigene11395_All	506	0.745	0	5e-12	MAX dimerization protein [Apis mellifera] >gi|109289360|gb|ABG29167.1| MAX dimerization protein [Apis mellifera]
Unigene11396_All	682	1.2897	3.1194	3e-12	RIKEN cDNA 1300003B13, isoform CRA_b [Mus musculus]
Unigene11397_All	603	0.8335	1.6603	1e-34	Probable isocitrate dehydrogenase [NAD] subunit beta, mitochondrial [Harpegnathos saltator]
Unigene11398_All	571	1.7604	2.4108	2e-10	transmembrane protein 231 [Danio rerio] >gi|82208325|sp|Q7T316.1|TM231_DANRE RecName: Full=Transmembrane protein 231 >gi|31419584|gb|AAH53293.1| Zgc:64166 [Danio rerio]
Unigene11399_All	967	0.2599	1.2941	--	--
Unigene1139_All	1621	13.875	59.8312	5e-88	Wiskott-Aldrich syndrome protein family member 3 [Camponotus floridanus]
Unigene113_All	1896	46.7873	63.2319	1e-162	similar to coatomer delta subunit [Nasonia vitripennis]
Unigene11400_All	1139	1.4341	0.3296	2e-31	protein kibra-like isoform 2 [Apis mellifera]
Unigene11401_All	568	3.7606	3.5252	--	--
Unigene11402_All	526	6.4497	6.6616	3e-12	similar to camp and camp-inhibited cgmp 3,5-cyclic phosphodiesterase [Strongylocentrotus purpuratus] >gi|115956163|ref|XP_001188724.1| similar to camp and camp-inhibited cgmp 3,5-cyclic phosphodiesterase [Strongylocentrotus purpuratus]
Unigene11403_All	1081	7.439	6.2514	7e-82	vacuolar sorting protein 35 [Polysphondylium pallidum PN500]
Unigene11404_All	632	5.9644	2.7722	4e-08	GK13847 [Drosophila willistoni] >gi|194168977|gb|EDW83878.1| GK13847 [Drosophila willistoni]
Unigene11405_All	987	0.2546	0	1e-89	electron-transfer-flavoprotein beta polypeptide [Bombyx mori] >gi|87248127|gb|ABD36116.1| electron-transfer-flavoprotein beta polypeptide [Bombyx mori]
Unigene11406_All	626	0.4014	0	1e-26	cop9 complex subunit 7a [Culex quinquefasciatus] >gi|167863003|gb|EDS26386.1| cop9 complex subunit 7a [Culex quinquefasciatus]
Unigene11407_All	674	1.6778	2.7851	4e-06	RNA-binding protein 27 [Callithrix jacchus]
Unigene11408_All	1146	0.4386	0	9e-40	dual specificity protein phosphatase cdc14 [Schistosoma mansoni]
Unigene11409_All	2066	2.1286	4.6035	--	--
Unigene1140_All	2890	6.739	17.7107	0	LOW QUALITY PROTEIN: acetyl-CoA carboxylase-like [Xenopus (Silurana) tropicalis]
Unigene11410_All	564	0	0	--	--
Unigene11411_All	569	2.8707	0.2199	--	--
Unigene11412_All	948	2.6508	3.5642	5e-52	similar to CG9031-PA [Nasonia vitripennis]
Unigene11413_All	556	5.4237	0.6752	1e-07	sec1 family domain containing 2-like [Saccoglossus kowalevskii]
Unigene11414_All	588	3.6327	0.4257	7e-13	similar to acetylcholinesterase T-form [Strongylocentrotus purpuratus] >gi|115950569|ref|XP_001194209.1| similar to acetylcholinesterase T-form [Strongylocentrotus purpuratus]
Unigene11415_All	548	0	0.2284	5e-25	Broad-complex core protein isoform 6 [Harpegnathos saltator]
Unigene11416_All	950	0.6613	0.3952	1e-23	anamorsin [Ictalurus punctatus]
Unigene11417_All	873	0.1439	1.7202	2e-72	DNA ligase 1 [Danio rerio] >gi|169153944|emb|CAQ14309.1| novel protein similar to H.sapiens LIG1, ligase I, DNA, ATP-dependent (LIG1) [Danio rerio] >gi|169154007|emb|CAQ15121.1| novel protein similar to H.sapiens LIG1, ligase I, DNA, ATP-dependent (LIG1) [Danio rerio]
Unigene11418_All	516	3.8961	10.1861	--	--
Unigene11419_All	1144	8.8965	1.2033	1e-36	similar to coagulation factor-like protein 3 [Nasonia vitripennis]
Unigene1141_All	1070	9.3944	23.6253	--	--
Unigene11420_All	690	1.6389	2.1764	5e-55	LOC553478 protein [Danio rerio]
Unigene11421_All	639	2.163	0.5875	5e-25	similar to hect (homologous to the E6-AP (UBE3A) carboxyl terminus) domain and RCC1 (CHC1)-like domain (RLD) 2 [Nasonia vitripennis]
Unigene11422_All	703	1.4299	2.1362	1e-40	LOC398471 protein [Xenopus laevis]
Unigene11423_All	702	10.9183	2.4957	5e-06	C. elegans protein Y45F10B.9, partially confirmed by transcript evidence [Caenorhabditis elegans]
Unigene11424_All	590	8.9446	1.6969	7e-10	LOW QUALITY PROTEIN: sushi, von Willebrand factor type A, EGF and pentraxin domain-containing protein 1-like [Pongo abelii]
Unigene11425_All	517	5.5898	2.6626	1e-27	LOW QUALITY PROTEIN: low-density lipoprotein receptor-related protein 6-like [Pongo abelii]
Unigene11426_All	837	0.4504	0	--	--
Unigene11427_All	479	0.5246	2.0901	7e-14	protein cereblon-like [Sus scrofa]
Unigene11428_All	493	2.2938	1.523	1e-23	Beta-1-syntrophin [Camponotus floridanus]
Unigene11429_All	670	1.5003	0.5603	1e-09	Rs1-like [Saccoglossus kowalevskii]
Unigene1142_All	1675	6.7513	31.9023	1e-85	similar to AGAP011318-PA [Tribolium castaneum]
Unigene11430_All	958	5.1152	0.5225	--	--
Unigene11431_All	554	1.134	2.4848	--	--
Unigene11432_All	552	0.4553	0	2e-50	long-chain acyl-CoA dehydrogenase-like [Saccoglossus kowalevskii]
Unigene11433_All	753	2.1693	1.1634	5e-41	AGAP006038-PA [Anopheles gambiae str. PEST] >gi|157015928|gb|EAA11204.4| AGAP006038-PA [Anopheles gambiae str. PEST]
Unigene11434_All	636	0	0	--	--
Unigene11435_All	1334	0.9419	1.0319	6e-09	similar to AGAP002006-PA [Tribolium castaneum]
Unigene11436_All	622	2.4241	1.8108	--	--
Unigene11437_All	671	0.3745	0	1e-22	similar to lethal (1) G0431 CG14788-PA [Tribolium castaneum]
Unigene11438_All	1026	0.9797	0.4879	4e-57	wilms tumor 1 associated protein [Culex quinquefasciatus] >gi|167864727|gb|EDS28110.1| wilms tumor 1 associated protein [Culex quinquefasciatus]
Unigene11439_All	544	2.5407	9.2017	--	--
Unigene1143_All	2815	15.935	14.9817	2e-44	similar to FLJ35848 protein [Gallus gallus]
Unigene11440_All	763	6.4225	0.492	--	--
Unigene11441_All	917	3.8366	2.8659	5e-38	G-protein signaling modulator 2-like protein [Metapenaeus ensis]
Unigene11442_All	697	0	0	--	--
Unigene11443_All	559	4.046	0.2239	--	--
Unigene11444_All	560	0.4487	0	1e-19	fmr [Gryllus bimaculatus]
Unigene11445_All	1059	0.2373	5.4359	8e-70	similar to phosphoacetylglucosamine mutase [Tribolium castaneum]
Unigene11446_All	521	0.9647	0	2e-08	similar to lethal (2) 44DEa CG8732-PB isoform 1 [Tribolium castaneum]
Unigene11447_All	534	0	0.4687	5e-24	actin-related protein 5 [Apis mellifera]
Unigene11448_All	561	5.8233	0.8923	--	--
Unigene11449_All	1150	2.513	8.9233	1e-122	abhydrolase domain-containing protein FAM108C1 [Homo sapiens] >gi|156630444|sp|Q6PCB6.2|F108C_HUMAN RecName: Full=Abhydrolase domain-containing protein FAM108C1 >gi|119619519|gb|EAW99113.1| hCG26607 [Homo sapiens] >gi|145207305|gb|AAH59401.2| FAM108C1 protein [Homo sapiens]
Unigene1144_All	1800	116.924	135.642	0	chaperonin containing TCP1, subunit 5 (epsilon) [Acyrthosiphon pisum]
Unigene11450_All	1092	2.3013	19.2529	--	--
Unigene11451_All	694	1.4484	0.3606	--	--
Unigene11452_All	528	3.8076	3.0812	--	--
Unigene11453_All	505	3.2345	8.1777	9e-24	glutathione S-transferase O1 [Nasonia vitripennis]
Unigene11454_All	540	2.3268	0.4635	4e-11	7-dehydrocholesterol reductase [Lepeophtheirus salmonis] >gi|290462921|gb|ADD24508.1| 7-dehydrocholesterol reductase [Lepeophtheirus salmonis]
Unigene11455_All	762	2.3085	2.4635	1e-24	similar to AGAP003656-PA [Tribolium castaneum]
Unigene11456_All	1006	0.3747	0.3732	3e-60	similar to Ocrl protein [Tribolium castaneum]
Unigene11457_All	1140	2.6453	1.7564	1e-83	similar to attractin [Nasonia vitripennis]
Unigene11458_All	1211	4.7728	2.3768	1e-55	acyl-CoA dehydrogenase family member 9, mitochondrial [Danio rerio] >gi|108742117|gb|AAI17590.1| Zgc:136367 [Danio rerio] >gi|182891452|gb|AAI64553.1| Zgc:136367 protein [Danio rerio]
Unigene11459_All	518	0.9703	1.9327	--	--
Unigene1145_All	1269	8.5153	37.0796	9e-72	similar to kismet CG3696-PA [Tribolium castaneum]
Unigene11460_All	904	0.834	0.1384	8e-11	KIAA0225-like [Saccoglossus kowalevskii]
Unigene11461_All	1042	4.7028	1.0809	4e-26	RecName: Full=DENN domain-containing protein 5B; AltName: Full=Rab6IP1-like protein
Unigene11462_All	527	3.5764	3.3245	--	--
Unigene11463_All	532	0.9447	0.2352	--	--
Unigene11464_All	516	2.9221	0.4851	--	--
Unigene11465_All	1408	4.2835	1.8665	7e-36	GK14913 [Drosophila willistoni] >gi|194161084|gb|EDW75985.1| GK14913 [Drosophila willistoni]
Unigene11466_All	631	0.3983	0	--	--
Unigene11467_All	1620	17.2962	1.0042	3e-70	L amino acid transporter-1 LAT-1-like [Saccoglossus kowalevskii]
Unigene11468_All	541	2.0903	0.4626	3e-21	Uncharacterized protein KIAA1109 [Harpegnathos saltator]
Unigene11469_All	915	2.0598	7.3855	2e-55	Syntaxin-12 [Caligus rogercresseyi]
Unigene1146_All	2098	46.3551	36.4456	1e-168	similar to mannosidase alpha class 2a [Tribolium castaneum]
Unigene11470_All	564	3.5645	1.7751	2e-21	kinase A-anchor protein neurobeachin [Simulium vittatum]
Unigene11471_All	1506	6.4243	12.7138	1e-38	CD9 antigen [Apis mellifera]
Unigene11472_All	1075	0.2338	0	--	--
Unigene11473_All	473	5.3129	0.5291	2e-21	ring finger and FYVE-like domain containing 1 [Nasonia vitripennis]
Unigene11474_All	530	0	0	1e-16	phosphoglucomutase [Culex quinquefasciatus] >gi|167882476|gb|EDS45859.1| phosphoglucomutase [Culex quinquefasciatus]
Unigene11475_All	542	5.7957	0	6e-17	beta 1,4-endoglucanase [Cherax quadricarinatus]
Unigene11476_All	537	23.1645	9.7878	2e-07	NADH dehydrogenase [Palaemonetes varians]
Unigene11477_All	1530	5.5844	9.897	1e-121	aldehyde dehydrogenase 16 family, member A1 [Xenopus (Silurana) tropicalis]
Unigene11478_All	1031	2.9249	4.4911	--	--
Unigene11479_All	417	5.4237	3.001	4e-13	DNA-dependent protein kinase catalytic subunit [Gallus gallus] >gi|11761137|dbj|BAA36956.1| DNA-dependent protein kinase catalytic subunit [Gallus gallus]
Unigene1147_All	1995	14.6749	24.7778	2e-37	GI20245 [Drosophila mojavensis] >gi|193910098|gb|EDW08965.1| GI20245 [Drosophila mojavensis]
Unigene11480_All	1434	0.0876	0	6e-72	AGAP000406-PA [Anopheles gambiae str. PEST] >gi|157018778|gb|EAA06535.5| AGAP000406-PA [Anopheles gambiae str. PEST]
Unigene11481_All	709	4.4305	2.2946	1e-61	splicing factor 3B subunit 3 [Culex quinquefasciatus] >gi|167864946|gb|EDS28329.1| splicing factor 3B subunit 3 [Culex quinquefasciatus]
Unigene11482_All	556	0.226	0	--	--
Unigene11483_All	460	1.9121	2.4485	--	--
Unigene11484_All	564	0.4456	0	--	--
Unigene11485_All	533	0	0	--	--
Unigene11486_All	1039	3.0233	1.5658	7e-14	similar to histone deacetylase [Nasonia vitripennis]
Unigene11487_All	424	0	1.1806	--	--
Unigene11488_All	1821	5.727	7.3533	1e-156	similar to prolidase [Equus caballus]
Unigene11489_All	383	6.5613	1.307	1e-15	similar to DRIM protein [Gallus gallus]
Unigene1148_All	1160	47.6603	29.4519	--	--
Unigene11490_All	529	3.0878	0	1e-05	eukaryotic peptide chain release factor GTP-binding subunit (erf2) (tr [Aedes aegypti] >gi|108883862|gb|EAT48087.1| eukaryotic peptide chain release factor GTP-binding subunit (erf2) (tr [Aedes aegypti]
Unigene11491_All	546	2.0712	0	--	--
Unigene11492_All	536	0.4688	0	2e-07	Coiled-coil domain-containing protein 58 [Camponotus floridanus]
Unigene11493_All	714	2.6397	3.5054	1e-17	Histidine-rich glycoprotein precursor [Brugia malayi]
Unigene11494_All	586	0	0	--	--
Unigene11495_All	817	1.6917	0.7659	3e-16	U88 [Brugia malayi]
Unigene11496_All	550	0	3.1855	6e-09	c-Myc-binding protein-like [Apis mellifera]
Unigene11497_All	929	0.2705	0.4041	2e-10	Glutamine and serine-rich protein 1 [Harpegnathos saltator]
Unigene11498_All	554	0	0	--	--
Unigene11499_All	526	4.5387	3.3308	7e-06	tripartite motif protein 2-like [Saccoglossus kowalevskii]
Unigene1149_All	1212	18.9719	21.0638	--	--
Unigene114_All	1405	37.1136	75.5316	--	--
Unigene11500_All	599	0.2098	0	7e-31	similar to Sirtuin 5 (silent mating type information regulation 2 homolog) 5 (S. cerevisiae) [Ornithorhynchus anatinus]
Unigene11501_All	1373	0	0	1e-06	cytosolic cyclophilin [Trichomonas vaginalis G3]
Unigene11502_All	493	0.7646	0.5077	2e-18	Translin [Harpegnathos saltator]
Unigene11503_All	1573	4.7927	9.7856	1e-136	glycylpeptide N-tetradecanoyltransferase 1-like [Acyrthosiphon pisum]
Unigene11504_All	516	0	0	--	--
Unigene11505_All	530	2.8449	1.889	--	--
Unigene11506_All	1328	3.69	1.1308	--	--
Unigene11507_All	1946	1.937	0.5145	--	--
Unigene11508_All	1034	0.8506	1.2103	1e-144	similar to Dual specificity tyrosine-phosphorylation-regulated kinase [Nasonia vitripennis]
Unigene11509_All	559	4.4955	0.4477	--	--
Unigene1150_All	2145	9.3725	70.1855	--	--
Unigene11510_All	642	0	0	1e-07	similar to a kinase anchor protein [Tribolium castaneum]
Unigene11511_All	824	5.1846	9.568	3e-48	GI11808 [Drosophila mojavensis] >gi|193920058|gb|EDW18925.1| GI11808 [Drosophila mojavensis]
Unigene11512_All	533	0.943	0.2348	--	--
Unigene11513_All	586	0.8577	0	5e-40	GI23978 [Drosophila mojavensis] >gi|193915054|gb|EDW13921.1| GI23978 [Drosophila mojavensis]
Unigene11514_All	502	2.2527	3.7394	3e-34	autophagy related protein Atg3-like protein [Bombyx mori] >gi|213390044|gb|ACJ46061.1| autophagy related protein Atg3-like protein [Bombyx mori]
Unigene11515_All	534	4.4707	0	1e-20	CaTaLase family member (ctl-2) [Caenorhabditis elegans] >gi|90111822|sp|Q27487.3|CATA1_CAEEL RecName: Full=Peroxisomal catalase 1 >gi|558565|emb|CAA57665.1| catalase [Caenorhabditis elegans] >gi|4008444|emb|CAA22451.1| C. elegans protein Y54G11A.5, confirmed by transcript evidence [Caenorhabditis elegans]
Unigene11516_All	2031	7.1146	7.4556	0	relish [Eriocheir sinensis]
Unigene11517_All	1202	1.3589	1.874	5e-25	methyltransferase like 7A [Danio rerio] >gi|116284237|gb|AAI24485.1| Zgc:153889 [Danio rerio]
Unigene11518_All	515	0	0	--	--
Unigene11519_All	408	7.6991	0.6134	6e-09	salivary gland secretion 1 [Drosophila melanogaster] >gi|55380421|gb|AAF50957.4| salivary gland secretion 1 [Drosophila melanogaster]
Unigene1151_All	2872	8.3562	45.9703	5e-53	Poly polymerase 12 [Salmo salar]
Unigene11520_All	558	3.6029	0.4485	1e-13	GK16068 [Drosophila willistoni] >gi|194171331|gb|EDW86232.1| GK16068 [Drosophila willistoni]
Unigene11521_All	990	1.2692	0.632	--	--
Unigene11522_All	541	3.9483	2.5445	--	--
Unigene11523_All	528	4.2835	0.9481	8e-08	Pre-mRNA cleavage complex 2 protein Pcf11 [Camponotus floridanus]
Unigene11524_All	577	2.1776	1.5182	--	--
Unigene11525_All	575	3.7149	0.2176	--	--
Unigene11526_All	553	5.4532	0	--	--
Unigene11527_All	498	3.28	4.0207	--	--
Unigene11528_All	2182	0.3455	0.2294	0	ALG-2 interacting protein x [Penaeus monodon]
Unigene11529_All	522	1.4443	1.1987	8e-16	HSPC300-like [Saccoglossus kowalevskii]
Unigene1152_All	1538	11.7643	31.5707	0	ATP-dependent RNA helicase [Aedes aegypti] >gi|108872147|gb|EAT36372.1| ATP-dependent RNA helicase [Aedes aegypti]
Unigene11530_All	962	1.8286	0.6504	--	--
Unigene11531_All	726	1.3846	3.6199	3e-10	similar to piccolo [Equus caballus]
Unigene11532_All	656	4.0223	3.8154	--	--
Unigene11533_All	626	2.6093	0	--	--
Unigene11534_All	2284	11.4427	0.3287	2e-46	pol-like protein [Biomphalaria glabrata]
Unigene11535_All	568	0.2212	0.4406	--	--
Unigene11536_All	560	3.8144	0.2235	--	--
Unigene11537_All	409	8.9092	4.5896	2e-23	similar to sorting nexin associated golgi protein 1, partial [Taeniopygia guttata]
Unigene11538_All	987	2.6734	1.9019	4e-64	GA11321 [Drosophila pseudoobscura pseudoobscura] >gi|195152597|ref|XP_002017223.1| GL22188 [Drosophila persimilis] >gi|54639142|gb|EAL28544.1| GA11321 [Drosophila pseudoobscura pseudoobscura] >gi|194112280|gb|EDW34323.1| GL22188 [Drosophila persimilis]
Unigene11539_All	947	2.7863	2.1144	--	--
Unigene1153_All	1712	48.4398	35.3794	--	--
Unigene11540_All	794	1.899	3.4675	--	--
Unigene11541_All	511	3.1966	0.9796	4e-30	cryptochrome [Euphausia superba]
Unigene11542_All	533	5.8935	0.4696	1e-10	colmedin [Culex quinquefasciatus] >gi|167868812|gb|EDS32195.1| colmedin [Culex quinquefasciatus]
Unigene11543_All	704	7.4962	18.6649	--	--
Unigene11544_All	563	2.6781	2.2228	--	--
Unigene11545_All	746	8.2531	0	2e-37	GK10886 [Drosophila willistoni] >gi|194166781|gb|EDW81682.1| GK10886 [Drosophila willistoni]
Unigene11546_All	1078	0.6993	0.1161	--	--
Unigene11547_All	634	0.3964	0	2e-83	NADH dehydrogenase iron-sulfur protein 8, mitochondrial [Culex quinquefasciatus] >gi|167864397|gb|EDS27780.1| NADH dehydrogenase iron-sulfur protein 8, mitochondrial [Culex quinquefasciatus]
Unigene11548_All	593	1.2713	0	1e-20	similar to NMD3 homolog (S. cerevisiae), like [Strongylocentrotus purpuratus] >gi|115935694|ref|XP_001196646.1| similar to NMD3 homolog (S. cerevisiae), like [Strongylocentrotus purpuratus]
Unigene11549_All	567	4.6537	0.6621	4e-08	GM13974 [Drosophila sechellia] >gi|194128446|gb|EDW50489.1| GM13974 [Drosophila sechellia]
Unigene1154_All	750	69.1911	170.029	1e-117	coatomer subunit beta'-like [Ailuropoda melanoleuca]
Unigene11550_All	497	5.3091	2.0144	7e-08	huntingtin [Danio rerio] >gi|220678509|emb|CAX13379.1| huntingtin [Danio rerio] >gi|220679358|emb|CAX13234.1| huntingtin [Danio rerio]
Unigene11551_All	632	4.5727	1.7821	8e-21	Late embryogenesis abundant protein B19.4 [Brugia malayi]
Unigene11552_All	649	2.9041	4.8206	4e-07	DNA polymerase zeta [Oryctolagus cuniculus]
Unigene11553_All	919	0.4102	0.2723	--	--
Unigene11554_All	3218	8.5901	5.5611	5e-95	Thioredoxin domain-containing protein 11 [Harpegnathos saltator]
Unigene11555_All	530	0	0	1e-31	similar to Aminoadipate aminotransferase [Equus caballus]
Unigene11556_All	1810	3.6098	2.4199	1e-163	Protein furry [Harpegnathos saltator]
Unigene11557_All	1335	0.2824	0.1875	6e-31	pre-mRNA-splicing factor 38B [Rattus norvegicus] >gi|81891333|sp|Q6AXY7.1|PR38B_RAT RecName: Full=Pre-mRNA-splicing factor 38B >gi|50925827|gb|AAH79264.1| PRP38 pre-mRNA processing factor 38 (yeast) domain containing B [Rattus norvegicus] >gi|149025727|gb|EDL81970.1| similar to sarcoma antigen NY-SAR-27 [Rattus norvegicus]
Unigene11558_All	510	9.1158	0	1e-06	GJ11407 [Drosophila virilis] >gi|194155491|gb|EDW70675.1| GJ11407 [Drosophila virilis]
Unigene11559_All	1359	5.6399	0.4604	5e-16	mannose receptor C type 1-like [Saccoglossus kowalevskii]
Unigene1155_All	745	10.6254	103.642	2e-12	histone H3 domain-containing protein [Dictyostelium discoideum AX4] >gi|74851544|sp|Q54F38.1|H3V1_DICDI RecName: Full=Histone H3.v1 >gi|60463694|gb|EAL61876.1| histone H3 domain-containing protein [Dictyostelium discoideum AX4]
Unigene11560_All	1291	0.1947	0.1939	1e-116	Methionine aminopeptidase 1 [Camponotus floridanus]
Unigene11561_All	1424	1.4118	1.1425	8e-36	mCG5393 [Mus musculus]
Unigene11562_All	600	2.7224	1.6686	2e-22	AGAP001650-PA [Anopheles gambiae str. PEST] >gi|116116267|gb|EAA00932.3| AGAP001650-PA [Anopheles gambiae str. PEST]
Unigene11563_All	505	0.4976	1.4869	5e-08	DIS3-like exonuclease 2 [Sus scrofa] >gi|285818458|gb|ADC38902.1| DIS3 mitotic control-like protein [Sus scrofa]
Unigene11564_All	879	0	0.1424	--	--
Unigene11565_All	624	3.6245	0.4011	2e-51	AGAP001482-PA [Anopheles gambiae str. PEST] >gi|157012738|gb|EAA01809.4| AGAP001482-PA [Anopheles gambiae str. PEST]
Unigene11566_All	1308	3.8425	2.3919	--	--
Unigene11567_All	592	1.0612	2.5367	--	--
Unigene11568_All	714	4.5755	1.5774	6e-48	similar to g-protein signalling modulator [Tribolium castaneum]
Unigene11569_All	572	9.885	145.272	--	--
Unigene1156_All	1390	18.0791	38.8036	3e-95	LOC446971 protein [Xenopus laevis]
Unigene11570_All	561	0	0	7e-08	GRIP and coiled-coil domain-containing protein 1 [Harpegnathos saltator]
Unigene11571_All	593	0	0	--	--
Unigene11572_All	563	7.1417	0	--	--
Unigene11573_All	538	0	0	--	--
Unigene11574_All	538	2.1019	0.2326	--	--
Unigene11575_All	620	0.4053	0	5e-06	GH11591 [Drosophila grimshawi] >gi|193905203|gb|EDW04070.1| GH11591 [Drosophila grimshawi]
Unigene11576_All	2626	24.5462	1.239	1e-101	CRE-ABTS-3 protein [Caenorhabditis remanei] >gi|308263643|gb|EFP07596.1| CRE-ABTS-3 protein [Caenorhabditis remanei]
Unigene11577_All	592	4.8817	0	--	--
Unigene11578_All	709	0.7089	0	--	--
Unigene11579_All	553	2.4994	1.3578	--	--
Unigene1157_All	871	83.5261	53.0173	2e-35	Protein FAM151A [Camponotus floridanus]
Unigene11580_All	558	0.9007	0	9e-16	Puratrophin-1 [Harpegnathos saltator]
Unigene11581_All	1052	1.4333	3.6877	2e-66	suppressor of G2 allele of SKP1 homolog [Gallus gallus]
Unigene11582_All	561	2.2397	0	--	--
Unigene11583_All	1001	2.7615	0.7501	5e-22	similar to Elongation factor Tu GTP-binding domain-containing protein 1 [Ciona intestinalis]
Unigene11584_All	533	4.4791	1.8783	3e-15	LOC100149074 protein [Danio rerio]
Unigene11585_All	1053	0	0	--	--
Unigene11586_All	561	6.0473	0.4461	5e-06	hypothetical protein DDB_G0268184 [Dictyostelium discoideum AX4] >gi|60475610|gb|EAL73545.1| hypothetical protein DDB_G0268184 [Dictyostelium discoideum AX4]
Unigene11587_All	905	2.9156	1.3828	2e-14	Ketohexokinase [Harpegnathos saltator]
Unigene11588_All	1738	4.6269	3.4562	1e-54	Trinucleotide repeat-containing gene 6A protein [Camponotus floridanus]
Unigene11589_All	596	1.0541	1.6798	1e-13	zinc finger CCCH domain-containing protein 14 [Gallus gallus] >gi|82075352|sp|Q5F3Z9.1|ZC3HE_CHICK RecName: Full=Zinc finger CCCH domain-containing protein 14
Unigene1158_All	6727	5.5662	28.128	1e-98	viral A-type inclusion protein [Trichomonas vaginalis G3]
Unigene11590_All	582	5.1814	2.3653	--	--
Unigene11591_All	859	4.6808	14.1315	3e-16	Histidine-rich glycoprotein precursor [Brugia malayi]
Unigene11592_All	633	0.5955	0	9e-17	super cysteine rich protein [Homo sapiens]
Unigene11593_All	807	3.4254	1.0855	1e-51	similar to BTB/POZ domain-containing protein 9 [Tribolium castaneum]
Unigene11594_All	648	4.2659	3.6693	--	--
Unigene11595_All	1111	1.9226	0.5632	--	--
Unigene11596_All	1602	7.059	31.7156	--	--
Unigene11597_All	881	0	0	--	--
Unigene11598_All	3881	7.0903	5.8041	1e-110	ubiquitin specific peptidase 10-like [Saccoglossus kowalevskii]
Unigene11599_All	569	2.6499	1.5396	2e-14	myomodulin neuropeptides 1-like [Callithrix jacchus]
Unigene1159_All	1696	15.4099	110.239	3e-55	Clathrin light chain [Harpegnathos saltator]
Unigene115_All	6235	6.9526	30.2874	1e-117	similar to ran-binding protein [Tribolium castaneum]
Unigene11600_All	635	4.5511	0.3942	3e-17	similar to CG6650 CG6650-PA [Ciona intestinalis]
Unigene11601_All	1214	11.3851	14.1225	2e-36	methyltransferase like 7A-like [Saccoglossus kowalevskii]
Unigene11602_All	563	0.2232	0	--	--
Unigene11603_All	580	3.2496	0.2158	--	--
Unigene11604_All	585	2.7922	5.7759	6e-29	glutaredoxin 5 [Haliotis discus discus]
Unigene11605_All	598	3.7821	136.863	1e-08	rCG21007 [Rattus norvegicus]
Unigene11606_All	592	1.698	1.6911	9e-57	ubiquitin-conjugating enzyme E2N-like [Homo sapiens]
Unigene11607_All	805	0.1561	0.1555	--	--
Unigene11608_All	794	3.165	5.2012	3e-40	SID-1-like protein [Litopenaeus vannamei]
Unigene11609_All	1358	2.7758	4.8841	5e-27	LOC733159 protein [Xenopus laevis]
Unigene1160_All	2021	31.2726	21.4868	--	--
Unigene11610_All	519	4.5999	1.4467	2e-33	3-hydroxybutyrate dehydrogenase type 2 isoform 1 [Mus musculus] >gi|148680220|gb|EDL12167.1| 3-hydroxybutyrate dehydrogenase, type 2, isoform CRA_b [Mus musculus]
Unigene11611_All	763	10.2101	0	--	--
Unigene11612_All	2832	2.174	1.9443	2e-24	similar to split ends CG18497-PA [Tribolium castaneum]
Unigene11613_All	996	2.9016	2.6386	1e-28	glycerol-3-phosphate dehydrogenase-1 [Bombyx mori] >gi|51555846|dbj|BAD38674.1| glycerol-3-phosphate dehydrogenase-1 [Bombyx mori]
Unigene11614_All	1012	0.745	1.9786	6e-07	CRE-LOV-1 protein [Caenorhabditis remanei] >gi|308242165|gb|EFO86117.1| CRE-LOV-1 protein [Caenorhabditis remanei]
Unigene11615_All	1191	2.0045	0.3152	2e-53	Dual specificity mitogen-activated protein kinase kinase 1 [Camponotus floridanus]
Unigene11616_All	579	0	0	1e-60	inositol 1,4,5-trisphosphate receptor [Panulirus argus]
Unigene11617_All	647	0	0	--	--
Unigene11618_All	441	7.9778	0.8513	1e-13	sodium/glucose cotransporter [Crassostrea gigas]
Unigene11619_All	1829	3.8471	1.9842	--	--
Unigene1161_All	1622	9.0635	224.981	--	--
Unigene11620_All	572	0	0	--	--
Unigene11621_All	719	5.4174	1.9146	--	--
Unigene11622_All	572	1.318	0	--	--
Unigene11623_All	569	1.1041	0	1e-20	Estradiol 17-beta-dehydrogenase 12-B-like [Saccoglossus kowalevskii]
Unigene11624_All	725	0	0	3e-26	Histone demethylase JARID1A [Harpegnathos saltator]
Unigene11625_All	713	25.5529	1.9307	--	--
Unigene11626_All	683	1.2878	0.9161	2e-47	GA23806 [Drosophila pseudoobscura pseudoobscura] >gi|198150243|gb|EDY73636.1| GA23806 [Drosophila pseudoobscura pseudoobscura]
Unigene11627_All	584	0.6455	0.4286	--	--
Unigene11628_All	651	0	0	--	--
Unigene11629_All	550	7.0821	1.3652	--	--
Unigene1162_All	1069	19.394	86.1607	5e-32	similar to CG18619 CG18619-PB [Tribolium castaneum]
Unigene11630_All	672	3.1786	1.1174	--	--
Unigene11631_All	513	0.2449	0	--	--
Unigene11632_All	869	3.3256	1.5841	4e-85	similar to like-glycosyltransferase [Taeniopygia guttata]
Unigene11633_All	1019	0.4932	0	1e-102	ARP3 actin-related protein 3 homolog [Taeniopygia guttata]
Unigene11634_All	2195	0.3435	0.057	3e-88	similar to microtubule associated serine/threonine kinase 2 [Nasonia vitripennis]
Unigene11635_All	884	3.127	0.5663	5e-65	similar to isocitrate dehydrogenase [Tribolium castaneum]
Unigene11636_All	992	11.273	0.7569	5e-54	solute carrier family 13, member 5 [Danio rerio]
Unigene11637_All	570	0	2.4151	2e-21	similar to DOM-3 homolog Z [Monodelphis domestica]
Unigene11638_All	1742	3.5344	1.3649	4e-65	Autophagy-related protein 2-like protein A [Harpegnathos saltator]
Unigene11639_All	570	8.3767	1.976	--	--
Unigene1163_All	1932	7.4141	70.9278	4e-71	nucleoporin 50kDa [Xenopus (Silurana) tropicalis] >gi|89269526|emb|CAJ82997.1| nucleoporin 50kDa [Xenopus (Silurana) tropicalis]
Unigene11640_All	539	2.7974	0.4644	--	--
Unigene11641_All	781	1.4479	1.4421	7e-73	similar to Prdx3 protein [Gallus gallus]
Unigene11642_All	505	5.4739	4.9562	--	--
Unigene11643_All	523	0	0	9e-23	Aspartate aminotransferase, mitochondrial precursor [Caligus rogercresseyi]
Unigene11644_All	1491	2.5282	0.7554	5e-34	WW domain-containing adapter protein with coiled-coil [Camponotus floridanus]
Unigene11645_All	618	0	0	--	--
Unigene11646_All	659	3.8133	15.0021	1e-34	keratin 9 [Mus musculus]
Unigene11647_All	548	1.605	0.6851	1e-39	similar to GH09096p [Nasonia vitripennis]
Unigene11648_All	628	5.4021	5.9782	--	--
Unigene11649_All	546	4.3724	2.292	9e-31	GF22076 [Drosophila ananassae] >gi|190617047|gb|EDV32571.1| GF22076 [Drosophila ananassae]
Unigene1164_All	1207	31.4385	188.078	1e-105	proteasome subunit alpha type 6 [Culex quinquefasciatus] >gi|167867923|gb|EDS31306.1| proteasome subunit alpha type 6 [Culex quinquefasciatus]
Unigene11650_All	1251	0.6026	1.6006	1e-21	yorkie isoform b [Gryllus bimaculatus]
Unigene11651_All	601	0	0	5e-21	similar to U4/U6 snRNP-associated 61 kDa protein [Monodelphis domestica]
Unigene11652_All	537	18.7188	362.381	--	--
Unigene11653_All	1273	4.1456	3.9322	6e-51	similar to AGAP005275-PA [Tribolium castaneum]
Unigene11654_All	618	6.5061	3.0375	--	--
Unigene11655_All	577	0.6533	2.3858	--	--
Unigene11656_All	882	4.5587	1.5607	1e-15	Hypothetical protein CBG06965 [Caenorhabditis briggsae]
Unigene11657_All	642	4.11	0.1949	3e-37	RecName: Full=Glutamine synthetase; AltName: Full=Glutamate--ammonia ligase >gi|160786|gb|AAA02583.1| glutamine synthetase [Panulirus argus]
Unigene11658_All	512	5.1536	1.7109	--	--
Unigene11659_All	878	0.1431	0	--	--
Unigene1165_All	1037	25.5662	36.0829	--	--
Unigene11660_All	1066	4.9506	3.9915	2e-07	hypothetical protein CRE_28355 [Caenorhabditis remanei] >gi|308259147|gb|EFP03100.1| hypothetical protein CRE_28355 [Caenorhabditis remanei]
Unigene11661_All	542	0	0	--	--
Unigene11662_All	388	6.8006	5.4831	2e-21	transformer-2a [Oryzias latipes] >gi|49204529|dbj|BAD24699.1| transformer-2a3 [Oryzias latipes]
Unigene11663_All	559	6.7433	37.8342	4e-27	Prefoldin subunit 1 [Caligus clemensi]
Unigene11664_All	967	1.2994	1.2941	5e-15	ATP-dependent RNA helicase DHX8-like isoform 1 [Apis mellifera]
Unigene11665_All	719	2.0971	5.9178	--	--
Unigene11666_All	531	0	0	--	--
Unigene11667_All	352	7.1392	2.8442	1e-32	similar to integrin alpha 1 [Nasonia vitripennis]
Unigene11668_All	542	1.6228	0.2309	--	--
Unigene11669_All	935	0	0.4015	4e-91	similar to GA19679-PA [Tribolium castaneum]
Unigene1166_All	552	284.078	535.488	--	--
Unigene11670_All	590	7.6668	10.6054	--	--
Unigene11671_All	1429	0.5276	0	9e-56	Sox14 protein [Scylla paramamosain]
Unigene11672_All	558	0	0.6728	2e-10	similar to LOC494994 protein [Strongylocentrotus purpuratus] >gi|115964510|ref|XP_001192618.1| similar to LOC494994 protein [Strongylocentrotus purpuratus]
Unigene11673_All	547	0	0	--	--
Unigene11674_All	547	4.8238	1.6015	4e-63	projectin [Procambarus clarkii]
Unigene11675_All	1086	6.4792	14.1737	1e-124	similar to TRAF4-associated factor 2 [Strongylocentrotus purpuratus] >gi|115934007|ref|XP_001193020.1| similar to TRAF4-associated factor 2 [Strongylocentrotus purpuratus]
Unigene11676_All	566	0.444	0.8844	7e-14	similar to GA10108-PA [Tribolium castaneum]
Unigene11677_All	1392	0.2708	0.0899	2e-32	transmembrane protein 214-like, partial [Saccoglossus kowalevskii]
Unigene11678_All	565	0	0	6e-54	cyclin B [Fenneropenaeus penicillatus]
Unigene11679_All	577	1.9599	3.2533	--	--
Unigene1167_All	1399	7.724	23.4365	5e-22	general transcription factor 3C polypeptide 6 [Mus musculus] >gi|81905677|sp|Q9D8P7.1|TF3C6_MOUSE RecName: Full=General transcription factor 3C polypeptide 6; AltName: Full=Transcription factor IIIC 35 kDa subunit; Short=TFIIIC 35 kDa subunit; Short=TFIIIC35; AltName: Full=Transcription factor IIIC subunit 6 >gi|29144899|gb|AAH48446.1| General transcription factor IIIC, polypeptide 6, alpha [Mus …
Unigene11680_All	507	0.4957	0	--	--
Unigene11681_All	604	0	0	1e-26	polymerase (RNA) III (DNA directed) polypeptide H (22.9kD) [Xenopus (Silurana) tropicalis]
Unigene11682_All	1682	9.2631	25.1478	3e-47	estrogen sulfotransferase-like [Apis mellifera]
Unigene11683_All	633	5.3595	17.3976	--	--
Unigene11684_All	937	2.1456	4.1403	1e-09	AGAP005952-PA [Anopheles gambiae str. PEST] >gi|157015857|gb|EAA11805.5| AGAP005952-PA [Anopheles gambiae str. PEST]
Unigene11685_All	554	0	0.2259	--	--
Unigene11686_All	657	0	0	5e-34	Vacuolar protein sorting-associated protein 13D [Camponotus floridanus]
Unigene11687_All	784	0.3205	0	4e-24	similar to Beta-1,3-N-acetylgalactosaminyltransferase 2 [Gallus gallus]
Unigene11688_All	911	1.793	0.5495	1e-102	hypoxia-inducible factor alpha [Metacarcinus magister]
Unigene11689_All	1176	11.8598	1.1706	6e-23	Growth arrest-specific protein 2 [Camponotus floridanus]
Unigene1168_All	1766	11.0282	11.2672	1e-153	protein ariadne-1 homolog [Apis mellifera]
Unigene11690_All	627	0.2004	0	--	--
Unigene11691_All	751	9.704	173.802	4e-06	GK13298 [Drosophila willistoni] >gi|194169248|gb|EDW84149.1| GK13298 [Drosophila willistoni]
Unigene11692_All	509	3.9497	3.9338	--	--
Unigene11693_All	708	5.8566	73.8843	--	--
Unigene11694_All	573	1.535	0.6552	--	--
Unigene11695_All	606	3.3175	12.8035	2e-11	similar to AGAP000207-PA [Tribolium castaneum]
Unigene11696_All	526	2.1499	5.9479	1e-29	similar to growth factor receptor-bound protein [Tribolium castaneum]
Unigene11697_All	674	5.7791	29.3364	2e-64	charged multivesicular body protein 5 [Aedes aegypti] >gi|94469372|gb|ABF18535.1| vacuolar sorting protein [Aedes aegypti] >gi|108871302|gb|EAT35527.1| charged multivesicular body protein 5 [Aedes aegypti]
Unigene11698_All	6814	3.061	2.0202	0	target of rapamycin [Blattella germanica]
Unigene11699_All	1268	0.6937	3.553	3e-72	Nuclear receptor corepressor 1 [Camponotus floridanus]
Unigene1169_All	1346	10.5486	7.5309	1e-146	GJ23552 [Drosophila virilis] >gi|194151129|gb|EDW66563.1| GJ23552 [Drosophila virilis]
Unigene116_All	2740	24.1211	32.4734	1e-103	serine/threonine protein kinase [Aedes aegypti] >gi|108872081|gb|EAT36306.1| serine/threonine protein kinase [Aedes aegypti]
Unigene11700_All	550	5.4829	1.1377	--	--
Unigene11701_All	873	7.7722	2.7236	2e-72	similar to tyrosine-protein kinase drl [Tribolium castaneum]
Unigene11702_All	1443	4.615	8.7592	2e-70	similar to Component of oligomeric golgi complex 8 [Gallus gallus]
Unigene11703_All	1832	1.5089	0.6831	1e-119	similar to AGAP002284-PA [Tribolium castaneum]
Unigene11704_All	690	1.821	1.995	--	--
Unigene11705_All	1193	0	0	--	--
Unigene11706_All	532	2.8342	0.4705	9e-12	similar to Hypothetical protein MGC31278 [Rattus norvegicus]
Unigene11707_All	575	4.5889	0.6529	2e-08	Titin [Camponotus floridanus]
Unigene11708_All	615	2.656	4.2732	3e-16	fmr [Gryllus bimaculatus]
Unigene11709_All	579	14.9738	57.7088	--	--
Unigene1170_All	1294	50.2017	74.4673	3e-81	similar to Protein YIF1B (YIP1-interacting factor homolog B) [Ciona intestinalis]
Unigene11710_All	730	2.0655	1.3714	8e-36	GJ16792 [Drosophila virilis] >gi|194146697|gb|EDW62416.1| GJ16792 [Drosophila virilis]
Unigene11711_All	791	6.5128	1.1075	1e-34	cadherin [Culex quinquefasciatus] >gi|167870411|gb|EDS33794.1| cadherin [Culex quinquefasciatus]
Unigene11712_All	495	14.4688	1.0113	--	--
Unigene11713_All	2108	3.934	7.777	0	structural maintenance of chromosomes protein 1A isoform 1 [Apis mellifera]
Unigene11714_All	919	3.2814	5.8555	4e-30	RNA-binding protein 9 [Lepeophtheirus salmonis]
Unigene11715_All	528	1.9038	0.474	7e-06	testis expressed 10 [Xenopus (Silurana) tropicalis]
Unigene11716_All	492	0.7662	4.8328	--	--
Unigene11717_All	942	9.4704	1.5942	4e-55	Uncharacterized sodium-dependent transporter CG3252 [Harpegnathos saltator]
Unigene11718_All	701	2.6887	3.3919	4e-18	Zgc:152951 [Danio rerio]
Unigene11719_All	538	3.9703	0.2326	2e-11	AGAP006880-PA [Anopheles gambiae str. PEST] >gi|116132557|gb|EAA04252.3| AGAP006880-PA [Anopheles gambiae str. PEST]
Unigene1171_All	2609	2.7933	33.9601	7e-58	Death-inducer obliterator 1 [Camponotus floridanus]
Unigene11720_All	1095	0.459	0.6857	--	--
Unigene11721_All	530	3.7932	1.6528	7e-12	macrophage migration inhibitory factor [Anisakis simplex]
Unigene11722_All	659	0.3813	0	8e-32	similar to heterogeneous nuclear ribonucleoprotein [Tribolium castaneum]
Unigene11723_All	1944	2.2622	1.1587	--	--
Unigene11724_All	547	16.5389	2.2878	--	--
Unigene11725_All	1491	1.854	1.0072	1e-92	hexosaminidase D-like isoform 1 [Apis mellifera]
Unigene11726_All	534	5.8825	0.7031	--	--
Unigene11727_All	585	5.1549	5.7759	--	--
Unigene11728_All	352	1.0709	4.2663	5e-19	GI23166 [Drosophila mojavensis] >gi|193915857|gb|EDW14724.1| GI23166 [Drosophila mojavensis]
Unigene11729_All	797	1.4189	1.0991	5e-46	similar to CG7872 CG7872-PA [Tribolium castaneum]
Unigene1172_All	2564	3.7734	17.1316	3e-59	similar to spri CG34414-PG [Tribolium castaneum]
Unigene11730_All	942	1.734	10.6279	--	--
Unigene11731_All	596	1.8974	0.8399	--	--
Unigene11732_All	951	0.2642	0	7e-42	similar to pleckstrin homology-like domain, family B, member 2 [Tribolium castaneum]
Unigene11733_All	420	8.3767	3.2776	5e-06	WNT1 inducible signaling pathway protein 3 [Oryctolagus cuniculus]
Unigene11734_All	976	0.2575	0	--	--
Unigene11735_All	1282	1.3722	1.8547	1e-18	broad Z1 isoform [Thermobia domestica]
Unigene11736_All	540	0.4654	0	--	--
Unigene11737_All	918	0.1369	0	4e-61	UDP-glucuronic acid decarboxylase 1 [Culex quinquefasciatus] >gi|167870050|gb|EDS33433.1| UDP-glucuronic acid decarboxylase 1 [Culex quinquefasciatus]
Unigene11738_All	582	0.4318	0.215	4e-31	similar to ribosomal protein P0-like protein [Ciona intestinalis]
Unigene11739_All	688	0	0	3e-28	Kinesin-like protein Klp10A [Harpegnathos saltator]
Unigene1173_All	806	7.0152	10.7133	--	--
Unigene11740_All	662	5.3145	0.3781	9e-12	similar to ENSANGP00000029021 [Nasonia vitripennis]
Unigene11741_All	499	3.0216	1.5047	--	--
Unigene11742_All	1351	2.3251	3.9831	7e-56	tubulin folding cofactor D [Xenopus (Silurana) tropicalis] >gi|111305929|gb|AAI21492.1| tubulin folding cofactor D [Xenopus (Silurana) tropicalis]
Unigene11743_All	918	4.9274	0.6816	--	--
Unigene11744_All	1863	2.6303	0.6046	--	--
Unigene11745_All	2113	1.5461	2.3098	1e-133	Formin-binding protein 1-like [Camponotus floridanus]
Unigene11746_All	675	0.3723	0	1e-31	CTP synthase [Culex quinquefasciatus] >gi|167880463|gb|EDS43846.1| CTP synthase [Culex quinquefasciatus]
Unigene11747_All	592	0	0	--	--
Unigene11748_All	539	0.4662	0	9e-21	novel protein (zgc:86811) [Danio rerio]
Unigene11749_All	791	1.9062	5.2209	2e-60	LOW QUALITY PROTEIN: inositol-3-phosphate synthase 1-like [Ailuropoda melanoleuca]
Unigene1174_All	1507	37.6032	17.2727	1e-73	MOXD1-like protein 2 [Harpegnathos saltator]
Unigene11750_All	542	4.6365	0.9236	2e-10	similar to colmedin [Tribolium castaneum]
Unigene11751_All	579	3.9062	2.3775	--	--
Unigene11752_All	520	5.5576	23.8254	7e-20	similar to arginine/serine-rich splicing factor [Nasonia vitripennis]
Unigene11753_All	546	0	0	--	--
Unigene11754_All	1243	0.4043	3.6244	--	--
Unigene11755_All	1170	20.7268	0.3209	3e-29	solute carrier family 6 member 9 transcript-like [Saccoglossus kowalevskii]
Unigene11756_All	574	0	0	9e-25	casein kinase 1 epsilon [Nasonia vitripennis]
Unigene11757_All	700	11.488	1.0727	9e-35	cadherin [Culex quinquefasciatus] >gi|167870411|gb|EDS33794.1| cadherin [Culex quinquefasciatus]
Unigene11758_All	541	5.1096	2.5445	2e-08	GK13548 [Drosophila willistoni] >gi|194168780|gb|EDW83681.1| GK13548 [Drosophila willistoni]
Unigene11759_All	547	0.9188	1.6015	1e-11	PCF11, cleavage and polyadenylation factor subunit, homolog [Xenopus (Silurana) tropicalis] >gi|189442711|gb|AAI67611.1| pcf11 protein [Xenopus (Silurana) tropicalis]
Unigene1175_All	1285	29.139	44.7012	--	--
Unigene11760_All	570	2.8657	0.8782	4e-18	HexA [Drosophila simulans] >gi|197125905|gb|ACH43390.1| HexA [Drosophila simulans] >gi|197125907|gb|ACH43391.1| HexA [Drosophila simulans] >gi|197125909|gb|ACH43392.1| HexA [Drosophila simulans] >gi|197125911|gb|ACH43393.1| HexA [Drosophila simulans] >gi|197125913|gb|ACH43394.1| HexA [Drosophila simulans] >gi|197125915|gb|ACH43395.1| HexA [Drosophila simulans] >gi|197125917|gb|ACH43396.1| HexA [D…
Unigene11761_All	559	4.9451	5.3729	--	--
Unigene11762_All	622	0.404	0	9e-11	lines [Nasonia vitripennis]
Unigene11763_All	607	0.621	1.237	3e-30	Vacuolar protein sorting-associated protein 41-like protein [Harpegnathos saltator]
Unigene11764_All	554	1.3608	0.2259	--	--
Unigene11765_All	568	1.3273	0.4406	1e-22	Zgc:110758 protein [Danio rerio]
Unigene11766_All	515	0	0	1e-07	conserved hypothetical protein [Pediculus humanus corporis] >gi|212506163|gb|EEB10460.1| conserved hypothetical protein [Pediculus humanus corporis]
Unigene11767_All	678	0.556	0.9229	1e-12	T-cell receptor beta chain ANA 11 [Brugia malayi]
Unigene11768_All	554	0	0	--	--
Unigene11769_All	1108	4.0825	2.146	4e-85	GI17000 [Drosophila mojavensis] >gi|193912288|gb|EDW11155.1| GI17000 [Drosophila mojavensis]
Unigene1176_All	1044	39.7169	180.524	1e-111	proteasome subunit alpha type 7-1 [Culex quinquefasciatus] >gi|167865546|gb|EDS28929.1| proteasome subunit alpha type 7-1 [Culex quinquefasciatus]
Unigene11770_All	550	2.513	0	4e-07	E-box binding protein 2 [Ictalurus punctatus]
Unigene11771_All	599	7.9711	1.2535	2e-14	BBSome-interacting protein of 10 kDa-like isoform 1 [Saccoglossus kowalevskii] >gi|291234538|ref|XP_002737199.1| BBSome-interacting protein of 10 kDa-like isoform 2 [Saccoglossus kowalevskii]
Unigene11772_All	1135	1.6606	4.8514	--	--
Unigene11773_All	929	0.2705	0	1e-104	similar to glycogen debranching enzyme [Tribolium castaneum]
Unigene11774_All	790	0.4772	0	2e-23	GG20202 [Drosophila erecta] >gi|190659249|gb|EDV56462.1| GG20202 [Drosophila erecta]
Unigene11775_All	556	6.3277	1.8006	7e-08	conserved hypothetical protein [Ixodes scapularis] >gi|215494929|gb|EEC04570.1| conserved hypothetical protein [Ixodes scapularis]
Unigene11776_All	522	1.685	4.0756	--	--
Unigene11777_All	516	4.3831	1.9402	3e-24	novel protein similar to vertebrate bromodomain and WD repeat domain containing 2 (BRWD2) [Danio rerio] >gi|220678588|emb|CAX12559.1| novel protein similar to vertebrate bromodomain and WD repeat domain containing 2 (BRWD2) [Danio rerio]
Unigene11778_All	655	4.4121	1.5285	7e-06	GK24739 [Drosophila willistoni] >gi|194163012|gb|EDW77913.1| GK24739 [Drosophila willistoni]
Unigene11779_All	549	0	0	--	--
Unigene1177_All	2145	6.8536	13.2437	5e-55	no ocelli [Tribolium castaneum]
Unigene11780_All	580	10.8319	27.1864	--	--
Unigene11781_All	548	7.5665	0.4567	1e-16	retinaldehyde binding protein-related [Schistosoma mansoni] >gi|238665358|emb|CAZ36105.1| retinaldehyde binding protein-related [Schistosoma mansoni]
Unigene11782_All	964	8.8633	3.3752	--	--
Unigene11783_All	1226	3.4846	1.9394	4e-37	Protein diaphanous [Harpegnathos saltator]
Unigene11784_All	866	0.2902	0	--	--
Unigene11785_All	934	0.6726	0.134	2e-28	similar to Methyltransferase-like protein 7B [Monodelphis domestica]
Unigene11786_All	544	3.4646	0	8e-27	GEX Interacting protein family member (gei-7)-like [Saccoglossus kowalevskii]
Unigene11787_All	680	0	0	--	--
Unigene11788_All	1380	1.6389	0.6348	--	--
Unigene11789_All	1600	3.4554	4.0672	1e-65	similar to synapse-associated protein [Nasonia vitripennis]
Unigene1178_All	1139	16.9886	16.7005	6e-23	hCG1793893 [Homo sapiens]
Unigene11790_All	1065	0.5899	0.8225	--	--
Unigene11791_All	1224	4.0035	1.5336	1e-08	similar to hkf-1 [Monodelphis domestica]
Unigene11792_All	592	0	0	6e-11	hypothetical protein IscW_ISCW009247 [Ixodes scapularis] >gi|215502295|gb|EEC11789.1| hypothetical protein IscW_ISCW009247 [Ixodes scapularis]
Unigene11793_All	620	5.2692	2.0184	--	--
Unigene11794_All	581	5.6229	1.9385	5e-10	Brefeldin A-inhibited guanine nucleotide-exchange protein 3 [Harpegnathos saltator]
Unigene11795_All	549	3.2042	1.3677	--	--
Unigene11796_All	1085	1.8529	1.1534	--	--
Unigene11797_All	607	0.207	0	--	--
Unigene11798_All	643	0.7816	0.7785	3e-25	Protein diaphanous [Harpegnathos saltator]
Unigene11799_All	927	1.8976	1.62	7e-45	similar to CG8557 CG8557-PB [Tribolium castaneum]
Unigene1179_All	918	11.4974	84.5198	7e-20	Zgc:152791 protein [Danio rerio]
Unigene117_All	1157	95.5677	76.1462	5e-86	RecName: Full=Crustacean calcium-binding protein 23; Short=CCBP-23
[truncated: 63,536 more rows]
